# Supplementary material for: Association between periductal fibrosis and bile duct dilatation among a population at high risk of cholangiocarcinoma: a cross-sectional study of cholangiocarcinoma screening in Northeast Thailand
Source: PubMed Central journal article supplement — BMJ Open. 2019 Mar 20;9(3):e023217. doi: 10.1136/bmjopen-2018-023217 (PMC6475358; doi:10.1136/bmjopen-2018-023217), 2019-03-20
Supplement: bmjopen-2018-023217.draft_revisions.pdf [file bmjopen-2018-023217.draft_revisions.pdf]

# BMJ Open

BMJ Open is committed to open peer review. As part of this commitment we make the peer review history of every article we publish publicly available.

When an article is published we post the peer reviewers' comments and the authors' responses online. We also post the versions of the paper that were used during peer review. These are the versions that the peer review comments apply to.

The versions of the paper that follow are the versions that were submitted during the peer review process. They are not the versions of record or the final published versions. They should not be cited or distributed as the published version of this manuscript.

BMJ Open is an open access journal and the full, final, typeset and author-corrected version of record of the manuscript is available on our site with no access controls, subscription charges or pay-per-view fees (<http://bmjopen.bmj.com>).

If you have any questions on BMJ Open's open peer review process please email [info.bmjopen@bmj.com](mailto:info.bmjopen@bmj.com)

# BMJ Open

## Periductal fibrosis and bile duct dilatation: pathways to diagnosis for cholangiocarcinoma in Northeast Thailand

|                               |                                                                                                                                                                                                                                                                                                                                                                                                                                                                                                                                                                                                                   |
|-------------------------------|-------------------------------------------------------------------------------------------------------------------------------------------------------------------------------------------------------------------------------------------------------------------------------------------------------------------------------------------------------------------------------------------------------------------------------------------------------------------------------------------------------------------------------------------------------------------------------------------------------------------|
| Journal:                      | <i>BMJ Open</i>                                                                                                                                                                                                                                                                                                                                                                                                                                                                                                                                                                                                   |
| Manuscript ID                 | bmjopen-2018-023217                                                                                                                                                                                                                                                                                                                                                                                                                                                                                                                                                                                               |
| Article Type:                 | Research                                                                                                                                                                                                                                                                                                                                                                                                                                                                                                                                                                                                          |
| Date Submitted by the Author: | 04-Apr-2018                                                                                                                                                                                                                                                                                                                                                                                                                                                                                                                                                                                                       |
| Complete List of Authors:     | Chamadol, Nittaya; Khon Kaen University Faculty of Medicine Khuntikeo, Narong; Khon Kaen University Faculty of Medicine Thinkhamrop , Bandit; Faculty of Public Health, Khon Kaen University, Department of Biostatistics and Epidemiology Thinkamrop, Kavin; Faculty of Public Health, Khon Kaen University, Department of Biostatistics and Epidemiology Suwannatarai, Apiporn; Khon Kaen University Faculty of Medicine Kelly, Matthew; The Australian National University, Research School of Population Health Promthet, Supanee; Faculty of Public Health, Khon Kaen University, Department of Epidemiology |
| Keywords:                     | bile duct dilatation, periductal fibrosis, ULTRASONOGRAPHY, cholangiocarcinoma, screening, Thailand                                                                                                                                                                                                                                                                                                                                                                                                                                                                                                               |
|                               |                                                                                                                                                                                                                                                                                                                                                                                                                                                                                                                                                                                                                   |

SCHOLARONE™  
Manuscripts

1  
2  
3 **1 TITLE PAGE**  
4

5  
6  
7  
8  
9  
10  
11  
12  
13  
14  
15  
16  
17  
18  
19  
20  
21  
22  
23  
24  
25  
26  
27  
28  
29  
30  
31  
32  
33  
34  
35  
36  
37  
38  
39  
40  
41  
42  
43  
44  
45  
46  
47  
48  
49  
50  
51  
52  
53  
54  
55  
56  
57  
58  
59  
60

2

3 **Title:** Periductal fibrosis and bile duct dilatation: pathways to diagnosis for

4 cholangiocarcinoma in Northeast Thailand

6 **Authors:** Nittaya Chamadol,<sup>1,2,3</sup> Narong Khuntikeo,<sup>1,2,4</sup> Bandit Thinkhamrop,<sup>1,2,5,6</sup> Kavin  
7 Thinkhamrop,<sup>1,2,6</sup> Apiporn T. Suwannatrai,<sup>1,2,7</sup> Matthew Kelly,<sup>8</sup> and Supanee Promthet<sup>1,5,9</sup>

9 **Affiliations:**

10 <sup>1</sup>Cholangiocarcinoma Screening and Care Program (CASCAP), Khon Kaen University, Khon  
11 Kaen, Thailand.

12 <sup>2</sup>Cholangiocarcinoma Research Institute, Khon Kaen University, Khon Kaen, Thailand.

13 <sup>3</sup>Department of Radiology, Faculty of Medicine, Khon Kaen University, Khon Kaen,  
14 Thailand.

15 <sup>4</sup>Department of Surgery, Faculty of Medicine, Khon Kaen University, Khon Kaen, Thailand.

16 <sup>5</sup>Epidemiology and Biostatistics Section, Faculty of Public Health, Khon Kaen University,  
17 Khon Kaen, Thailand.

18 <sup>6</sup>Data Management and Statistical Analysis Center (DAMASAC), Faculty of Public Health,  
19 Khon Kaen University, Khon Kaen, Thailand.

20 <sup>7</sup>Department of Parasitology, Faculty of Medicine, Khon Kaen University, Khon Kaen,  
21 Thailand.

22 <sup>8</sup>Department of Global Health, Research School of Population Health, Australian National  
23 University, Canberra, Australia.

24 <sup>9</sup>ASEAN Cancer Epidemiology and Prevention Research Group, Khon Kaen University,  
25 Khon Kaen, Thailand.

1  
2  
3 26  
4

5 **Email address:**

6  
7 NC: Nittaya Chamadol (nittayachamadol@yahoo.com)

8  
9 NK: Narong Khuntikeo (nkhuntikeo@gmail.com)

10  
11 BT: Bandit Thinkhamrop (bandit@kku.ac.th)

12  
13 KT: Kavin Thinkhamrop (kvinth@gmail.com)

14  
15 AT: Apiporn T. Suwannatrai (apiporn@kku.ac.th)

16  
17 MK: Matthew Kelly (matthew.kelly@anu.edu.au)

18  
19 SP: Supanee Promthet (supanee@kku.ac.th)

20  
21  
22 35  
23

24 **Corresponding authors:**

25  
26 Name: Supanee Promthet

27  
28 Address: ASEAN Cancer Epidemiology and Prevention Research Group,  
29  
30  
31 Khon Kaen University, Khon Kaen 40002, Thailand.

32  
33 Telephone: +66-82 668 1995

34  
35 e-Mail: supanee@kku.ac.th

36  
37 42  
38

39 **Type of contribution:** Research article

40  
41 **Number of words in the abstract:** 298

42  
43 **Number of words in the text:** 3,086 (excluding references and tables)

44  
45 **Number of tables:** 2

46  
47 **Number of figures:** 3

48  
49  
50  
51  
52  
53  
54  
55  
56  
57  
58  
59  
60

1  
2  
3 48 **ABSTRACT**

4  
5 49 **Objectives** To assess associations between periductal fibrosis (PDF) and bile duct dilatation  
6  
7 50 (BDD) in ultrasonography (US) screening of population at risk of cholangiocarcinoma  
8  
9 51 (CCA) due to residence in an endemic area for *Opisthorchis viverrini*. CCA survival rates  
10  
11 52 are low and early identification of risk factors is essential. BDD is one symptom which can  
12  
13 53 identify patients at risk of CCA. Detection of PDF by US can also identify at risk patients, at  
14  
15 54 an earlier stage of CCA development. Identification of association between PDF and BDD  
16  
17 55 will inform screening practices for CCA risk, by increasing the viability of PDF screening for  
18  
19 56 CCA risk.

22 57 **Setting** Nine tertiary care hospitals in Northeast Thailand.

24 58 **Design** Cross-sectional study.

26 59 **Participants** Study subjects in the Cholangiocarcinoma Screening and Care Program  
27  
28 60 (CASCAP) in Northeast Thailand. CASCAP inclusion criteria are all residents of Northeast  
29  
30 61 Thailand aged 40 years and over. Participants are recruited through CCA screening centers  
31  
32 62 and through primary health care units. So far 394 026 have been enrolled.

35 63 **Methods** PDF and BDD were identified through US. PDF was categorized into three groups,  
36  
37 64 PDF1, 2 and 3, depending on their high echo locality in the peripheral, segmental and main  
38  
39 65 bile duct, respectively. Associations between PDF and BDD were determined by adjusted  
40  
41 66 odds ratio (OR) and 95% confidence interval (CI) using multiple logistic regression.

44 67 **Results** BDD was found in 6.6% of PDF3, 1.7% of PDF2, and 1.4% of PDF1 cases. Among  
45  
46 68 PDF cases, especially in PDF3, BDD was found in male more than female (8.9% and 4.6%,  
47  
48 69 respectively). Compared to non-PDF, the association between PDF3 and BDD was highly  
49  
50 70 significant (adjusted OR=5.74, 95% CI 4.57 to 7.21, P<0.001).

1  
2  
3 71 **Conclusions** Our findings reveal that there is a relationship between PDF and BDD, which is  
4  
5 72 associated with CCA. Therefore, PDF can also be an indicator for suspected-CCA diagnosis  
6  
7 73 through US.  
8

9 74

10  
11 75 **Keywords** bile duct dilatation; periductal fibrosis; ultrasonography; cholangiocarcinoma;  
12  
13 76 screening; Thailand  
14

15  
16 77

17  
18 78 **Article summary**

19  
20 79 **Strengths and limitations of the study**

- 21  
22 80 • The large size of the study population and its geographic distribution across Northeast  
23  
24 81 Thailand are a significant strength.  
25  
26 82 • This is the first and largest screening program for cholangiocarcinoma (CCA) in an  
27  
28 83 area with the highest incidence in the world.  
29  
30 84 • CCA risk factors (PDF and BDD) were measured using ultrasonography by skilled  
31  
32 85 radiologists.  
33  
34 86 • Demographic, and some health, data were self-reported leading to potential bias in  
35  
36 87 measurement of liver fluke infection, praziquantel treatment, and pre-existing medical  
37  
38 88 conditions including HB, HC, and DM.  
39  
40 89 • Self-report could lead to prevalence underestimates due to the fact that subjects may  
41  
42 90 not have been willing to disclose sensitive or personal information.  
43  
44  
45  
46  
47  
48  
49  
50  
51  
52  
53  
54  
55  
56  
57  
58  
59  
60

## 93 INTRODUCTION

94 Cholangiocarcinoma (CCA) and hepatocellular carcinoma (HCC), are ranked the most  
95 prevalent cancers in Southeast Asia.<sup>1-3</sup> The early-stages of CCA can manifest through  
96 obstructive jaundice, which is found in 30% of patients who are diagnosed with primary  
97 sclerosing cholangitis.<sup>4</sup> Other liver disorders: fatty liver disease, cirrhosis, and liver mass are  
98 likewise recognized risk factors for both CCA and HCC.<sup>5-10</sup> Suspected CCA cases can also be  
99 identified through the presence of bile duct dilatation (BDD), which can be identified in  
100 suspected CCA cases through ultrasonography (US) screening.<sup>11 12</sup> A previous study  
101 demonstrated that US screening is highly sensitive in identifying CCA through confirmed  
102 incidences of BDD.<sup>13</sup> However, upon the detection and diagnosis of bile duct and liver  
103 disorders, it is often too late to save patients with CCA and HCC due to the rapid progression  
104 to advanced stages of hepatic carcinoma.<sup>14</sup> As well, detection of BDD by US requires the  
105 services of specialist radiologists, who are generally only available in major hospitals,  
106 limiting access to screening. Thus, the best way to save a patient's life and prevent the  
107 likelihood of cancer development is through early, easily accessible, screenings to detect the  
108 risk factors that may lead to cancer among high-risk populations.

109 As well as BDD there are several other indicators for CCA risk including well-accepted  
110 premalignant lesions such as biliary intraepithelial neoplasm (BilIN), and intraductal  
111 papillary neoplasm of the bile duct (IPNB).<sup>15 16</sup> Periductal fibrosis (PDF) is another  
112 abnormality of the bile duct which has been used to identify people at risk of developing  
113 CCA, especially in those infected with *Opisthorchis viverrini*.<sup>17-21</sup> PDF is caused by the  
114 thickening of the bile duct wall, along the periportal space.<sup>22</sup> PDF can be categorized into  
115 three groups (PDF1, 2, and 3), which were first classified by the World Health Organization  
116 (WHO).<sup>23</sup> Based on certain US findings, PDF1 is defined as having a high echo in the wall of  
117 small bile ducts scattered in the liver as a starry sky pattern, PDF2 is a high echo along the

1  
2  
3 118 segmental bile duct wall running parallel with the portal vein, and PDF3 is a high echo along  
4  
5 119 the main bile duct wall running parallel with the portal vein in the periportal space.<sup>19</sup>  
6

7 120 The relationship between PDF and CCA is indicated by the regular detection of PDF in  
8  
9 121 confirmed CCA cases, and this has been particularly common in Northeast Thailand where  
10  
11 122 *O. viverrini* is endemic and a leading potential cause of CCA.<sup>8</sup> As a result of this relationship,  
12  
13 123 US detection has been utilized to identify people with PDF as a risk group for CCA  
14  
15 124 development.<sup>8 20 24 25</sup> Importantly, PDF can be identified through US, but does not require the  
16  
17 125 services of a specialist radiologist increasing the potential access to screening, and PDF can  
18  
19 126 be detected earlier than BDD allowing more effective intervention.  
20  
21

22 127 The potential to detect the risk of CCA earlier and without the need for specialist  
23  
24 128 radiologists, through the identification of PDF may be an important breakthrough in reducing  
25  
26 129 CCA incidence. So, both PDF and BDD have been recognized as indicators of CCA<sup>8 17</sup>, but  
27  
28 130 their relationship to one another has yet to be established or even studied in depth.  
29  
30 131 Determining their relationship, such as learning if one precedes the other may make a  
31  
32 132 significant change in how we screen for CCA via US. Therefore, this study seeks to  
33  
34 133 determine if there is an association between PDF and BDD among people at a high-risk CCA  
35  
36 134 population in Northeast Thailand. The results of this work will clarify necessary directions  
37  
38 135 toward early screening methodologies and appropriate cancer treatment.  
39  
40  
41

42 136

## 43 137 **METHODS**

### 44 138 **Study design**

45  
46  
47 139 This cross-sectional study collected data from the Cholangiocarcinoma Screening and Care  
48  
49 140 Program (CASCAP) in Northeast Thailand. CASCAP is a prospective cohort study that is  
50  
51 141 considered the first project for CCA screening in a high-risk population with a community-  
52  
53 142 based bottom-up approach.<sup>26</sup> This cohort study was conducted at 9 tertiary care hospitals in  
54  
55  
56  
57  
58  
59  
60



1  
2  
3 143 Northeast of Thailand. These hospitals serve as the main source of affordable tertiary care for  
4  
5 144 local people in the region. The study aims to recruit all people living in Northeast Thailand  
6  
7 145 and aged 40 years and over, including patients attending screening for CCA and the general  
8  
9 146 population attending primary health care units. All participants were asked to join the project  
10  
11 147 by signing a consent form. All CCA patients were diagnosed and treated according to routine,  
12  
13 148 real world clinical practice by participating hospitals. Patients were followed-up and provided  
14  
15 149 with either clinical or palliative care depending on the stage of their disease. Treatment  
16  
17 150 outcomes were recorded. Follow-up took place every 3-6 months depending on the patient's  
18  
19 151 condition and unless scheduled otherwise.  
20  
21  
22  
23

152

### 24 153 **Study population**

26 154 Our study recruited subjects from among people who participated the CASCAP project.  
27  
28 155 These subjects form two groups (screening and walk-in). The screening group was people  
29  
30 156 who have undergone routine US and who showed no symptoms that could be related to CCA.  
31  
32 157 The walk-in group was people who come to the hospital with symptoms indicating CCA  
33  
34 158 which has been diagnosed with US. The subjects included in our study only those enrolled in  
35  
36 159 the CASCAP database from 2013-2017 with a total of 394 026 subjects.  
37  
38  
39

160

### 43 161 **Patient and Public Involvement**

45 162 The CASCAP project is a comprehensive screening and treatment program for CCA. Patients  
46  
47 163 in the screening arm will be contacted at least annually to be screening for CCA risk. Patients  
48  
49 164 identified as having CCA will receive standard care for the condition through the project. For  
50  
51 165 the screening procedures covered by this report patients are informed of the purpose,  
52  
53 166 outcomes and implications of these procedures.  
54  
55

167

## 168 **Main outcome and independent variables**

169 The primary outcome for this study was BDD which was categorized into two groups  
170 (no/yes). The independent variable of interest was PDF which was categorized into three  
171 groups (PDF1, 2 and 3) depending on their ultrasound detectable high echo locality in the  
172 peripheral, segmental and main bile duct, respectively. Both BDD and PDF diagnosed via US  
173 by radiologist from the CASCAP. Demographic characteristics of PDF and non-PDF subjects  
174 were the independent variables includes gender, age, education levels, occupations, having a  
175 relative diagnosed with CCA, liver fluke infection, praziquantel (PZQ) treatments, smoking  
176 (current or previous), alcohol consumption (current or previous) and diagnosis with hepatitis  
177 B (HB), hepatitis C (HC), and diabetes mellitus (DM). All demographic characteristics listed  
178 above were collected via face-to-face interview by interviewer from the CASCAP using  
179 questionnaire.

## 181 **Statistical analysis**

182 The demographic characteristics that were categorical data were summarized using  
183 frequencies and percentages (i.e. gender, age groups, education levels, occupations, having a  
184 relative diagnosed with CCA, liver fluke infection, PZQ treatments, smoking history, alcohol  
185 consumption history and diagnosis with HB, HC, DM, and PDFs). The continuous data, such  
186 as the age of the subjects, were summarized by their mean, standard deviation, median,  
187 minimum and maximum range.

188 The prevalence of BDD was calculated and the percentage of the prevalence was  
189 computed based on a normal approximation to a binomial distribution. Bivariate analysis  
190 using simple logistic regression was performed to investigate the association between the  
191 independent factors listed above and BDD. They were determined by crude odds ratio (OR)  
192 and their 95% confidence intervals (CI). Then multivariable analysis using multiple logistic

1  
2  
3 193 regression was carried out to investigate the association between PDF and BDD as  
4  
5 194 determined by the adjusted OR and 95% CI. The final multivariate model was adjusted for all  
6  
7 195 factors which previous studies have reported to be associated with the hepatobiliary disease:  
8  
9 196 PDF, gender, age, education levels, occupations, having a relative diagnosed with CCA, liver  
10  
11 197 fluke infection, PZQ treatments, smoking, alcohol consumption as well as diagnosis with HB,  
12  
13 198 HC, and DM.

15  
16 199 There were missing values for some variables due to unwillingness of some participants  
17  
18 200 to answer some socio-demographic or health history questions or from errors in data  
19  
20 201 collection. Missing values for most variables were rare with proportions missing less than 3%  
21  
22 202 of participants. The only variable with a significant proportion of missing values was that of  
23  
24 203 previous liver fluke diagnosis (n=211 869), but this number includes those who had reported  
25  
26 204 never having been tested for infection.

28  
29 205 All test statistics were two-tailed and a p-value of less than 0.05 was considered  
30  
31 206 statistically significant. All analyses were performed by using a statistical package, Stata  
32  
33 207 version 15 (StataCorp, College Station, Texas, USA).

34  
35 208

## 37 209 **RESULTS**

### 39 210 **Descriptive summary**

41 211 The demographic characteristics of subjects were presented as numbers and percentages. A  
42  
43 212 total of 394 026 subjects who underwent US screenings for CCA were enrolled in our study.  
44  
45 213 The subjects were all between the ages of 40-100 years old and reported a mean age of  
46  
47 214 54.92±9.03 years old. Of these, approximately two-thirds were female (61.4%) and the  
48  
49 215 majority of them completed primary school education level (72.9%) and worked as farmers  
50  
51 216 (77.9%). About one-third (29.7%) had ever used PZQ treatment, and about one-fourth  
52  
53 217 (21.3%) reported being a smoker or ex-smoker. The data of PDF diagnosis, 17.6% have  
54  
55  
56  
57  
58  
59  
60

1  
2  
3 218 positive diagnosed and the highest percentage was in subjects diagnosed with PDF1 (12.3%)  
4  
5 219 while only 0.6% for PDF3 (table 1).  
6

7 220

8  
9 221 <Table 1 located here>  
10

11 222

### 12 13 223 **Prevalence of BDD**

14  
15 224 From this study, the overall prevalence of BDD was reported to be 1.2%. The highest  
16  
17 225 prevalence of BDD was 6.6% from the PDF3 group under periductal fibrosis. PDF1 and  
18  
19 226 PDF2 subjects reported a low prevalence rate of only 1.4% and 1.7%, respectively (table 2).  
20  
21 227 Our study found that the prevalence of BDD occurring in PDF subjects was high in male  
22  
23 228 more than female, particularly in PDF3 (8.9% and 4.6%, respectively) (figure 1). Meanwhile,  
24  
25 229 we also found the number of BDD in PDF1 subjects was highest among people aged 55 years  
26  
27 230 old (figure 2).  
28  
29  
30

31 231

### 32 33 232 **Associations with BDD**

#### 34 35 233 **Bivariate analysis**

36  
37 234 The crude analysis using simple logistic regression found the variable with the strongest  
38  
39 235 association to BDD to be PDF3 compared to non-PDF (OR=6.35, 95% CI 5.40 to 7.46,  
40  
41 236 P<0.001). Other factors that were significantly associated with BDD included: gender, with  
42  
43 237 male being more affected by BDD than female; age, with a progressively increasing OR;  
44  
45 238 lower education levels; occupations that was unemployed; infected liver fluke; PZQ used,  
46  
47 239 with a progressively increasing OR; having a history of smoking and alcohol consumption;  
48  
49 240 being positive for DM diagnosis (table 2).  
50

51 241

#### 52 53 242 **Multivariable analysis**

54  
55  
56  
57  
58  
59  
60

1  
2  
3 243 Through the multivariable analysis using multiple logistic regression, all factors were  
4  
5 244 adjusted and the association of PDF3 subjects having BDD remained significantly high  
6  
7 245 compared with non-PDF subjects (adjusted OR=5.74, 95% CI 4.57 to 7.21, P<0.001) (table  
8  
9 246 2). Compared to crude OR, the adjusted OR of gender, age, occupations, liver fluke infection,  
10  
11 247 smoking history and alcohol consumption history, and a positive diagnosis of DM remained  
12  
13 248 statistically significant, while a positive diagnosis of HB and HC remained non-significant  
14  
15 249 (figure 3). Our study also found that relatives diagnosed with CCA changed from non-  
16  
17 250 significant in bivariate analysis to significant in multivariable analysis, while education levels  
18  
19 251 and PZQ treatment changed from significant to non-significant.  
20  
21

22 252

23 253 &lt;Table 2 located here&gt;

24 254

25 255 &lt;Figure 1 located here&gt;

26 256

27 257 &lt;Figure 2 located here&gt;

28 258

29 259 &lt;Figure 3 located here&gt;

30 260

31 261 **DISCUSSION**

32 262 Liver cancer is one of the leading causes of death throughout the world.<sup>27</sup> CCA accounts for  
33 263 more than 60% of these liver cancer cases with Northeast Thailand reporting the highest  
34 264 incidence in the world.<sup>28 29</sup> PDF and BDD have been recognized as the key risk factors of  
35 265 CCA development.<sup>8 17 21</sup> Due to ambiguities in the relationship between PDF and BDD, our  
36 266 study investigated the prevalence of PDF and BDD in a high-risk CCA population to find if  
37 267 there was a presence of a statistically significant relationship between the two factors. Our  
38  
39  
40  
41  
42  
43  
44  
45  
46  
47  
48  
49  
50  
51  
52  
53  
54  
55  
56  
57  
58  
59  
60

1  
2  
3 268 study specifically found that the prevalence of BDD was significantly higher (6.6%) among  
4  
5 269 subjects who were diagnosed with PDF3 and it was the most statistically significant  
6  
7 270 associated factor of BDD (adjusted OR=5.74, 95% CI 4.57 to 7.21, P<0.001). Although a  
8  
9 271 study conducted in Japan, concluded fibrosis and BDD as being indicators of CCA, they did  
10  
11 272 not mention an association between them.<sup>17</sup> In addition, studies conducted in Thailand report  
12  
13 273 only PDF as a major risk factor of CCA development.<sup>8 21 30</sup>

14  
15 274 We conducted a bivariate analysis via a simple logistic regression and found that gender,  
16  
17 275 age, and smoking history were the three most significant factors associated with BDD and  
18  
19 276 remained significant in the multivariable analysis. The factor of relatives diagnosed with  
20  
21 277 CCA became significant in multivariable analysis, but the magnitude of association was still  
22  
23 278 relatively low, while education levels and PZQ treatment became non-significant. The other  
24  
25 279 factors that were statistically significant in the bivariate analysis became less significant after  
26  
27 280 adjusting for all factors in the multivariable analysis included occupations, alcohol  
28  
29 281 consumption history, and being diagnosed with DM.

30  
31 282 Our study found that those aged 60-years-old and over are more likely to have BDD than  
32  
33 283 other age groups. Meanwhile, our study also found the association of BDD increased with  
34  
35 284 increasing age. We conclude that age plays a role in BDD development. This result is similar  
36  
37 285 to a study conducted in Israel between 2001-2002 which found that bile duct size increases  
38  
39 286 with age and reported age was positively correlated with bile duct size.<sup>31</sup> A study from  
40  
41 287 Canada in 2014 found that older age was associated with bile duct diameters which increases  
42  
43 288 with age.<sup>32</sup> Therefore, it is not a surprise that those who were in the oldest age group in our  
44  
45 289 study had a strong association with BDD, which causes the bile duct to grow.

46  
47 290 Subjects positive for HB and HC diagnosis demonstrated a non-significant association  
48  
49 291 with BDD (adjusted OR=1.16, 95% CI 0.88 to 1.52, P=0.298 and adjusted OR=1.69, 95% CI  
50  
51 292 0.87 to 3.31, P=0.124, respectively). Our findings are close to results reported by Barusrux

1  
2  
3 293 and colleagues in 2012 which found that HB and HC were not related to CCA.<sup>33</sup> However, it  
4  
5 294 is also important to mention contradictory results reported in South Korea which found that  
6  
7 295 HBV infection was a significant risk factor for intrahepatic cholangiocarcinoma (ICC)  
8  
9 296 development with OR=2.3, 95% CI 1.6 to 3.3 P<0.05.<sup>34</sup> HBV infection was also related to a  
10  
11 297 3.4-fold risk of ICC in China.<sup>35</sup> Another study conducted in Northeast Thailand in 2010,  
12  
13 298 examined the association of HB and HC with CCA and reported a greater risk of CCA for  
14  
15 299 those carrying the virus (OR=4, 95% CI 1.29 to 16.44, P<0.05).<sup>36</sup>

16  
17  
18 300 And interestingly, those who had CCA diagnosed relatives, had a higher association to  
19  
20 301 BDD than those who did not have CCA diagnosed relatives only 12% (adjusted OR=1.12,  
21  
22 302 95% CI 1.02 to 1.24, P=0.018). However, our results were consistent with Zhou et al. (2014),  
23  
24 303 who identified genetic and familial risk factors as significantly contributing to the  
25  
26 304 development of combined HCC-CCA through a bivariate analysis.<sup>37</sup> It is worth mentioning  
27  
28 305 that this significance could not be confirmed through a multivariable analysis. Other studies  
29  
30 306 also demonstrate that having a family history of cancer is a significant associated factor for  
31  
32 307 CCA development.<sup>38 39</sup> A risk factor study of CCA in Northeast Thailand also reported  
33  
34 308 patients who had a family history of cancer were more likely to develop CCA than those  
35  
36 309 without a family history of liver cancer.<sup>40</sup> Death or traumatic incidences influence the  
37  
38 310 decision-making process. This may be the reason behind the lack of association between  
39  
40 311 family history of CCA and BDD in our statistical analysis. Perhaps family members who  
41  
42 312 experience a death of CCA-diagnosed family member are more likely to take measures in  
43  
44 313 preventing the occurrence of a second CCA incidence in the family. A CCA traumatic  
45  
46 314 experience may have served as a warning for family members to avoid this rapid and fatal  
47  
48 315 outcome. These results reveal the complicated nature of understanding the true risk factors of  
49  
50 316 CCA and pathogenesis to hepatic carcinoma in certain Asian societies.  
51  
52  
53  
54  
55  
56  
57  
58  
59  
60

## 318 **CONCLUSIONS**

319 In conclusion, our key findings included identifying the factors associated with biliary tract  
320 disease in a high-risk population for CCA: PDF3, male gender, older age, having CCA-  
321 diagnosed relatives, infected liver fluke, and smoking history. Based on our results, patients  
322 should be considered suspected-CCA cases during US screenings in high-risk areas through  
323 the detection of PDF, old age (50 and over), if they were infected for liver fluke, have CCA-  
324 diagnosed relatives, and are current or previous smokers. The interesting results regarding  
325 HB and HC diagnoses may need further evaluation and review due to some contradictions in  
326 the data. Greater consideration toward CCA and HCC prevention should be aimed at those in  
327 older age groups. Despite certain limitations, our data was based on a very large sample size  
328 and suggests a statistically robust association between PDF and BDD, specifically the PDF3  
329 grouping. Early and routine screening of BDD and PDF may provide a means to reduce the  
330 incidence of liver-related diseases and CCA. Future planning of CCA surveillance should  
331 focus on early screening for both PDF and BDD.

332

## 333 **Recommendations**

334 This study was conducted in Northeast Thailand and may not reflect the general population.  
335 Further study is necessary in the region to test the generality of our results. Nevertheless, the  
336 methodology and results of our study can be used as a guideline in formulating clinical  
337 practice and future research priorities.

338

## 339 **List of abbreviations**

340 BDD, Bile duct dilatation; CASCAP, Cholangiocarcinoma Screening and Care Program;  
341 CCA, Cholangiocarcinoma; CI, Confidence interval; DM, Diabetes mellitus, HB, Hepatitis  
342 B; HC, Hepatitis C; HCC, Hepatocellular carcinoma; ICC, Intrahepatic cholangiocarcinoma;



1  
2  
3 343 N/A, Not applicable; OR, Odds ratios; PDF, Periductal fibrosis; PZQ, Praziquantel; US,  
4  
5 344 Ultrasonography; WHO, World Health Organization.

6  
7 345

8  
9 346 **Conflict of interest**

10  
11 347 All authors declare no conflict of interest.

12  
13 348

14  
15 349 **Acknowledgements** This study was supported by Khon Kaen University (KKU) through  
16  
17 350 CASCAP project and the National Research Council of Thailand through the Medical  
18  
19 351 Research Network of the Consortium of Thai Medical Schools. The study was also supported  
20  
21 352 by the Data Management and Statistical Analysis Center (DAMASAC), Faculty of Public  
22  
23 353 Health, KKU, Thailand. We would like to acknowledge and thank Dr.Malcolm Anthony  
24  
25 354 Moore for his comments and suggestions over the final version of the manuscript.

26  
27 355

28  
29 356 **Author contributions** NC, SP, and KT conceived and designed this study. KT and BT  
30  
31 357 performed the analysis. NC, SP, NK, BT, KT, ATS and MK wrote the manuscript. NC, NK,  
32  
33 358 BT and KT collected the data and generated the clinical database. All authors have been  
34  
35 359 involved in revising the manuscript, and all authors have read and approved the final  
36  
37 360 manuscript.

38  
39 361

40  
41 362 **Funding** This work was supported by Khon Kaen University through CASCAP) Grant No .  
42  
43 363 CASCAP 1/60(, the National Research Council of Thailand through the Medical Research  
44  
45 364 Network of the Consortium of Thai Medical Schools) Grant No .MRF.59-076 (and National  
46  
47 365 Research Council of Thailand )NRCT/2559-134.(

48  
49 366

50  
51 367 **Competing interests** The authors declare that they have no competing interests.

1  
2  
3 368

4  
5 369 **Patient consent** All patients gave written informed consent for the study.

6  
7 370

8  
9 371 **Ethics approval** The research protocol was approved by Khon Kaen University Ethics

10  
11 372 Committee for Human Research, reference number HE591067.

12  
13 373

14  
15 374 **Provenance and peer review** Not commissioned; externally peer reviewed.

16  
17 375

18  
19 376 **Data sharing statement** No additional data are available.

20  
21 377

22  
23 378

24  
25 379

26  
27  
28  
29 380 **REFERENCES**

30  
31 381 1. Moore MA, Attasara P, Khuhaprema T, et al. Cancer epidemiology in mainland South-  
32 East Asia - past, present and future. *Asian Pacific journal of cancer prevention : APJCP*  
33 2010;11 Suppl 2:67-80.

34  
35 382  
36  
37 384 2. Moore MA, Manan AA, Chow KY, et al. Cancer epidemiology and control in peninsular  
38 and island South-East Asia - past, present and future. *Asian Pacific journal of cancer*  
39 *prevention : APJCP* 2010;11 Suppl 2:81-98.

40  
41 385  
42 386  
43  
44 387 3. National Cancer Institute. Hospital based cancer registry annual report 2012. Bangkok:  
45 Eastern Printing Public Company Limited PCL.157 2012.

46  
47 388  
48 389 4. Rosen CB, Nagorney DM, Wiesner RH, et al. Cholangiocarcinoma complicating primary  
49 sclerosing cholangitis. *Annals of surgery* 1991;213(1):21-5.

50  
51 390  
52 391 5. Songserm N, Promthet S, Sithithaworn P, et al. Risk factors for cholangiocarcinoma in  
53 high-risk area of Thailand: role of lifestyle, diet and methylenetetrahydrofolate reductase  
54  
55 392

- 1  
2  
3 393 polymorphisms. *Cancer epidemiology* 2012;36(2):e89-94. doi:  
4  
5 394 10.1016/j.canep.2011.11.007  
6  
7 395 6. Tao LY, He XD, Qu Q, et al. Risk factors for intrahepatic and extrahepatic  
8  
9 396 cholangiocarcinoma: a case-control study in China. *Liver international : official journal*  
10  
11 397 *of the International Association for the Study of the Liver* 2010;30(2):215-21. doi:  
12  
13 398 10.1111/j.1478-3231.2009.02149.x  
14  
15 399 7. Shaib YH, El-Serag HB, Nooka AK, et al. Risk factors for intrahepatic and extrahepatic  
16  
17 400 cholangiocarcinoma: a hospital-based case-control study. *The American journal of*  
18  
19 401 *gastroenterology* 2007;102(5):1016-21. doi: 10.1111/j.1572-0241.2007.01104.x  
20  
21  
22 402 8. Chamadol N, Pairojkul C, Khuntikeo N, et al. Histological confirmation of periductal  
23  
24 403 fibrosis from ultrasound diagnosis in cholangiocarcinoma patients. *Journal of hepato-*  
25  
26 404 *biliary-pancreatic sciences* 2014;21(5):316-22. doi: 10.1002/jhbp.64  
27  
28  
29 405 9. Welzel TM, Graubard BI, El-Serag HB, et al. Risk factors for intrahepatic and  
30  
31 406 extrahepatic cholangiocarcinoma in the United States: a population-based case-control  
32  
33 407 study. *Clinical gastroenterology and hepatology : the official clinical practice journal of*  
34  
35 408 *the American Gastroenterological Association* 2007;5(10):1221-8. doi:  
36  
37 409 10.1016/j.cgh.2007.05.020  
38  
39 410 10. Shaib YH, El-Serag HB, Davila JA, et al. Risk factors of intrahepatic cholangiocarcinoma  
40  
41 411 in the United States: a case-control study. *Gastroenterology* 2005;128(3):620-6.  
42  
43  
44 412 11. Hamilton SR, Aaltonen LA. Pathology and genetics of tumours of the digestive system.  
45  
46 413 France: Lyon : Oxford : IARC Press ; Oxford University Press (distributor). 2000.  
47  
48 414 12. Khan SA, Davidson BR, Goldin RD, et al. Guidelines for the diagnosis and treatment of  
49  
50 415 cholangiocarcinoma: an update. *Gut* 2012;61(12):1657-69. doi: 10.1136/gutjnl-2011-  
51  
52 416 301748  
53  
54  
55  
56  
57  
58  
59  
60

- 1  
2  
3 417 13. Saini S. Imaging of the hepatobiliary tract. *The New England journal of medicine*  
4  
5 418 1997;336(26):1889-94. doi: 10.1056/NEJM199706263362607  
6  
7 419 14. Blechacz B, Gores GJ. Cholangiocarcinoma: advances in pathogenesis, diagnosis, and  
8  
9 420 treatment. *Hepatology* 2008;48(1):308-21. doi: 10.1002/hep.22310  
10  
11 421 15. Zen Y, Adsay NV, Bardadin K, et al. Biliary intraepithelial neoplasia: an international  
12  
13 422 interobserver agreement study and proposal for diagnostic criteria. *Modern pathology* :  
14  
15 423 *an official journal of the United States and Canadian Academy of Pathology, Inc*  
16  
17 424 2007;20(6):701-9. doi: 10.1038/modpathol.3800788  
18  
19  
20 425 16. Nakanuma Y, Sasaki M, Sato Y, et al. Multistep carcinogenesis of perihilar  
21  
22 426 cholangiocarcinoma arising in the intrahepatic large bile ducts. *World journal of*  
23  
24 427 *hepatology* 2009;1(1):35-42. doi: 10.4254/wjh.v1.i1.35  
25  
26  
27 428 17. Maetani Y, Itoh K, Watanabe C, et al. MR imaging of intrahepatic cholangiocarcinoma  
28  
29 429 with pathologic correlation. *AJR American journal of roentgenology* 2001;176(6):1499-  
30  
31 430 507. doi: 10.2214/ajr.176.6.1761499  
32  
33 431 18. National Cancer Institue. Guidelines for screening, diagnosis and treatment of liver  
34  
35 432 cancer and cholangiocarcinoma. Bangkok: National Office of Buddhism 2011:81.  
36  
37 433 19. Nittaya Chamadol. Imaging in Cholangiocarcinoma. Khon Kaen, Thailand: Department  
38  
39 434 of Radiology, Faculty of Medicine, Khon Kaen University, Khon Kaen, Thailand 2014.  
40  
41  
42 435 20. Xu HX, Chen LD, Liu LN, et al. Contrast-enhanced ultrasound of intrahepatic  
43  
44 436 cholangiocarcinoma: correlation with pathological examination. *The British journal of*  
45  
46 437 *radiology* 2012;85(1016):1029-37. doi: 10.1259/bjr/21653786  
47  
48 438 21. Sripa B, Mairiang E, Thinkhamrop B, et al. Advanced periductal fibrosis from infection  
49  
50 439 with the carcinogenic human liver fluke *Opisthorchis viverrini* correlates with elevated  
51  
52 440 levels of interleukin-6. *Hepatology* 2009;50(4):1273-81. doi: 10.1002/hep.23134  
53  
54  
55  
56  
57  
58  
59  
60

- 1  
2  
3 441 22. Benedetti NJ, Desser TS, Jeffrey RB. Imaging of hepatic infections. *Ultrasound Q*  
4  
5 442 2008;24(4):267-78. doi: 10.1097/RUQ.0b013e31818e5981  
6  
7 443 23. Berhe N, Geitung JT, Medhin G, et al. Large scale evaluation of WHO's ultrasonographic  
8  
9 444 staging system of schistosomal periportal fibrosis in Ethiopia. *Tropical Medicine &*  
10  
11 445 *International Health* 2006;11(8):1286-94. doi: DOI 10.1111/j.1365-3156.2006.01665.x  
12  
13 446 24. Loria F, Loria G, Basile S, et al. Contrast-enhanced ultrasound appearances of  
14  
15 447 enhancement patterns of intrahepatic cholangiocarcinoma: correlation with pathological  
16  
17 448 findings. *Updates in surgery* 2014;66(2):135-43. doi: 10.1007/s13304-014-0251-6  
18  
19 449 25. Elkins DB, Mairiang E, Sithithaworn P, et al. Cross-sectional patterns of hepatobiliary  
20  
21 450 abnormalities and possible precursor conditions of cholangiocarcinoma associated with  
22  
23 451 *Opisthorchis viverrini* infection in humans. *The American journal of tropical medicine*  
24  
25 452 *and hygiene* 1996;55(3):295-301.  
26  
27 453 26. Khuntikeo N, Chamadol N, Yongvanit P, et al. Cohort profile: cholangiocarcinoma  
28  
29 454 screening and care program (CASCAP). *BMC cancer* 2015;15:459. doi: 10.1186/s12885-  
30  
31 455 015-1475-7  
32  
33 456 27. Ferlay J, Soerjomataram I, Dikshit R, et al. Cancer incidence and mortality worldwide:  
34  
35 457 sources, methods and major patterns in GLOBOCAN 2012. *International journal of*  
36  
37 458 *cancer Journal international du cancer* 2015;136(5):E359-86. doi: 10.1002/ijc.29210  
38  
39 459 28. Sripa B, Pairojkul C. Cholangiocarcinoma: lessons from Thailand. *Current opinion in*  
40  
41 460 *gastroenterology* 2008;24(3):349-56. doi: 10.1097/MOG.0b013e3282fbf9b3  
42  
43 461 29. Srivatanakul P, Sriplung H, Deerasamee S. Epidemiology of liver cancer: an overview.  
44  
45 462 *Asian Pacific journal of cancer prevention : APJCP* 2004;5(2):118-25.  
46  
47 463 30. Prakobwong S, Yongvanit P, Hiraku Y, et al. Involvement of MMP-9 in peribiliary  
48  
49 464 fibrosis and cholangiocarcinogenesis via Rac1-dependent DNA damage in a hamster  
50  
51  
52  
53  
54  
55  
56  
57  
58  
59  
60

- 1  
2  
3 465 model. *International journal of cancer Journal internationale du cancer*  
4  
5 466 2010;127(11):2576-87. doi: 10.1002/ijc.25266  
6  
7 467 31. Bachar GN, Cohen M, Belenky A, et al. Effect of aging on the adult extrahepatic bile  
8  
9 468 duct: a sonographic study. *Journal of ultrasound in medicine : official journal of the*  
10  
11 469 *American Institute of Ultrasound in Medicine* 2003;22(9):879-82; quiz 83-5.  
12  
13 470 32. Landry D, Tang A, Murphy-Lavallee J, et al. Dilatation of the bile duct in patients after  
14  
15 471 cholecystectomy: a retrospective study. *Canadian Association of Radiologists journal =*  
16  
17 472 *Journal l'Association canadienne des radiologistes* 2014;65(1):29-34. doi:  
18  
19 473 10.1016/j.carj.2012.09.004  
20  
21 474 33. Barusrux S, Nanok C, Puthisawas W, et al. Viral hepatitis B, C infection and genotype  
22  
23 475 distribution among cholangiocarcinoma patients in northeast Thailand. *Asian Pacific*  
24  
25 476 *journal of cancer prevention : APJCP* 2012;13 Suppl:83-7.  
26  
27 477 34. Lee TY, Lee SS, Jung SW, et al. Hepatitis B virus infection and intrahepatic  
28  
29 478 cholangiocarcinoma in Korea: a case-control study. *The American journal of*  
30  
31 479 *gastroenterology* 2008;103(7):1716-20. doi: 10.1111/j.1572-0241.2008.01796.x  
32  
33 480 35. Li M, Li J, Li P, et al. Hepatitis B virus infection increases the risk of  
34  
35 481 cholangiocarcinoma: a meta-analysis and systematic review. *Journal of gastroenterology*  
36  
37 482 *and hepatology* 2012;27(10):1561-8. doi: 10.1111/j.1440-1746.2012.07207.x  
38  
39 483 36. Srivatanakul P, Honjo S, Kittiwatanachot P, et al. Hepatitis viruses and risk of  
40  
41 484 cholangiocarcinoma in northeast Thailand. *Asian Pacific journal of cancer prevention :*  
42  
43 485 *APJCP* 2010;11(4):985-8.  
44  
45 486 37. Zhou YM, Zhang XF, Wu LP, et al. Risk factors for combined hepatocellular-  
46  
47 487 cholangiocarcinoma: a hospital-based case-control study. *World journal of*  
48  
49 488 *gastroenterology : WJG* 2014;20(35):12615-20. doi: 10.3748/wjg.v20.i35.12615  
50  
51  
52  
53  
54  
55  
56  
57  
58  
59  
60

- 1  
2  
3 489 38. Kamsa-Ard S, Luvira V, Pugkhem A, et al. Association between praziquantel treatment  
4  
5 490 and cholangiocarcinoma: a hospital-based matched case-control study. *BMC cancer*  
6  
7 491 2015;15:776. doi: 10.1186/s12885-015-1788-6  
8  
9 492 39. Liu ZY, Zhou YM, Shi LH, et al. Risk factors of intrahepatic cholangiocarcinoma in  
10  
11 493 patients with hepatolithiasis: a case-control study. *Hepatobiliary & pancreatic diseases*  
12  
13 494 *international : HBPD INT* 2011;10(6):626-31.  
14  
15 495 40. Manwong M, Songserm N, Promthet S, et al. Risk factors for cholangiocarcinoma in the  
16  
17 496 lower part of Northeast Thailand: a hospital-based case-control study. *Asian Pacific*  
18  
19 497 *journal of cancer prevention : APJCP* 2013;14(10):5953-6.  
20  
21  
22 498  
23  
24 499  
25  
26  
27  
28  
29  
30  
31  
32  
33  
34  
35  
36  
37  
38  
39  
40  
41  
42  
43  
44  
45  
46  
47  
48  
49  
50  
51  
52  
53  
54  
55  
56  
57  
58  
59  
60

1  
2  
3 500 **Captions for the figures:**  
4

5 501

6  
7 502 **Figure 1** Percentage of BDD between male and female according to PDF1, 2, and 3.  
8

9 503

10  
11 504 **Figure 2** Number of BDD in PDF subjects by age range.  
12

13 505

14  
15 506 **Figure 3** The adjusted OR and crude OR of the associated factors of BDD.  
16

17 507  
18  
19

20 **Table 1** Baseline demographic and clinical characteristics of subjects  
21

| Characteristics            | Number (n=394 026) | Percentage |
|----------------------------|--------------------|------------|
| Gender                     |                    |            |
| Female                     | 242 115            | 61.4       |
| Male                       | 151 866            | 38.6       |
| Missing data (n=45)        |                    |            |
| Age group (years)          |                    |            |
| 40-44                      | 49 281             | 12.9       |
| 45-49                      | 71 564             | 18.7       |
| 50-54                      | 78 428             | 20.5       |
| 55-59                      | 69 530             | 18.2       |
| 60 years and over          | 114 305            | 29.8       |
| Mean±Standard deviation    | 54.92±9.03         |            |
| Median (minimum : maximum) | 54 (40 : 100)      |            |
| Missing data (n=10 918)    |                    |            |
| Education levels           |                    |            |
| None                       | 6561               | 1.7        |
| Primary                    | 286 840            | 72.9       |



**Table 1** Baseline demographic and clinical characteristics of subjects

| Characteristics                       | Number (n=394 026) | Percentage |
|---------------------------------------|--------------------|------------|
| Secondary                             | 78 090             | 19.9       |
| Certificate/Bachelor                  | 18 632             | 4.7        |
| Higher than bachelor                  | 3055               | 0.8        |
| Missing data (n=848)                  |                    |            |
| Occupation                            |                    |            |
| Unemployed                            | 15 582             | 4.0        |
| Farmer                                | 306 421            | 77.9       |
| Labor                                 | 32 420             | 8.2        |
| Own business                          | 13 467             | 3.4        |
| Government official/State enterprises | 13 997             | 3.6        |
| Others                                | 11 335             | 2.9        |
| Missing data (n=804)                  |                    |            |
| Relatives diagnosed with CCA          |                    |            |
| No                                    | 319 902            | 81.4       |
| Yes                                   | 73 286             | 18.6       |
| Missing data (n=838)                  |                    |            |
| Liver fluke infection                 |                    |            |
| No                                    | 113 178            | 62.1       |
| Yes                                   | 68 979             | 37.9       |
| Missing data (n=211 869)              |                    |            |
| Praziquantel treatment                |                    |            |
| None                                  | 270 183            | 70.3       |
| One time                              | 84 136             | 21.9       |
| Two times                             | 18 126             | 4.7        |
| Three times                           | 5264               | 1.4        |

**Table 1** Baseline demographic and clinical characteristics of subjects

| Characteristics             | Number (n=394 026) | Percentage |
|-----------------------------|--------------------|------------|
| More than three times       | 6414               | 1.7        |
| Missing data (n=9903)       |                    |            |
| Smoking history             |                    |            |
| No                          | 308 776            | 78.7       |
| Yes, current or previous    | 83 754             | 21.3       |
| Missing data (n=1496)       |                    |            |
| Alcohol consumption history |                    |            |
| No                          | 214 495            | 54.6       |
| Yes, current or previous    | 178 564            | 45.4       |
| Missing data (n=967)        |                    |            |
| Hepatitis B                 |                    |            |
| No                          | 382 058            | 98.2       |
| Yes                         | 6803               | 1.8        |
| Missing data (n=5165)       |                    |            |
| Hepatitis C                 |                    |            |
| No                          | 388 114            | 99.8       |
| Yes                         | 747                | 0.2        |
| Missing data (n=5165)       |                    |            |
| Diabetes mellitus           |                    |            |
| No                          | 362 296            | 93.2       |
| Yes                         | 26 565             | 6.8        |
| Missing data (n=5165)       |                    |            |
| Periductal fibrosis         |                    |            |
| None                        | 324 482            | 82.4       |
| PDF1                        | 48 383             | 12.3       |

**Table 1** Baseline demographic and clinical characteristics of subjects

| Characteristics | Number (n=394 026) | Percentage |
|-----------------|--------------------|------------|
| PDF2            | 18 686             | 4.7        |
| PDF3            | 2475               | 0.6        |

508

**Table 2** Prevalence, and crude and adjusted odd ratios of BDD associated factors and their 95% confidence interval

| Factors              | Subjects | % BDD | Crude OR | Adjusted OR | 95% CI       | P value |
|----------------------|----------|-------|----------|-------------|--------------|---------|
| Over all             | 394 026  | 1.2   | N/A      | N/A         | N/A          | N/A     |
| Periductal fibrosis  |          |       |          |             |              | <0.001  |
| None                 | 324 482  | 1.1   | 1        | 1           |              |         |
| PDF1                 | 48 383   | 1.4   | 1.23     | 1.25        | 1.11 to 1.40 |         |
| PDF2                 | 18 686   | 1.7   | 1.55     | 1.24        | 1.04 to 1.47 |         |
| PDF3                 | 2475     | 6.6   | 6.35     | 5.74        | 4.57 to 7.21 |         |
| Gender               |          |       |          |             |              | <0.001  |
| Female               | 242 115  | 0.9   | 1        | 1           |              |         |
| Male                 | 151 866  | 1.7   | 2.00     | 1.46        | 1.31 to 1.63 |         |
| Age group (years)    |          |       |          |             |              | <0.001  |
| 40-44                | 49 281   | 0.6   | 1        | 1           |              |         |
| 45-49                | 71 564   | 0.6   | 1.04     | 1.10        | 0.88 to 1.38 |         |
| 50-54                | 78 428   | 0.9   | 1.44     | 1.42        | 1.15 to 1.75 |         |
| 55-59                | 69 530   | 1.1   | 1.77     | 1.74        | 1.42 to 2.14 |         |
| 60 years and over    | 114 305  | 2.1   | 3.46     | 3.14        | 2.59 to 3.81 |         |
| Education levels     |          |       |          |             |              | 0.472   |
| None                 | 6561     | 1.6   | 1        | 1           |              |         |
| Primary              | 286 840  | 1.3   | 0.82     | 0.91        | 0.65 to 1.27 |         |
| Secondary            | 78 090   | 0.8   | 0.53     | 0.72        | 0.51 to 1.03 |         |
| Certificate/Bachelor | 18 632   | 1.1   | 0.71     | 0.81        | 0.53 to 1.24 |         |
| Higher than bachelor | 3055     | 1.5   | 0.98     | 0.94        | 0.52 to 1.71 |         |

**Table 2** Prevalence, and crude and adjusted odd ratios of BDD associated factors and their 95% confidence interval

| Factors                      | Subjects | % BDD | Crude OR | Adjusted OR | 95% CI       | P value |
|------------------------------|----------|-------|----------|-------------|--------------|---------|
| Occupations                  |          |       |          |             |              | <0.001  |
| Unemployed                   | 15 582   | 2.5   | 1        | 1           |              |         |
| Farmer                       | 306 421  | 1.1   | 0.45     | 0.47        | 0.40 to 0.55 |         |
| Labor                        | 32 420   | 1.0   | 0.39     | 0.53        | 0.41 to 0.67 |         |
| Own business                 | 13 467   | 1.0   | 0.40     | 0.65        | 0.48 to 0.87 |         |
| Government/State enterprises | 13 997   | 1.5   | 0.59     | 0.87        | 0.63 to 1.20 |         |
| Others                       | 11 335   | 1.4   | 0.57     | 0.60        | 0.44 to 0.80 |         |
| Relatives diagnosed with CCA |          |       |          |             |              | 0.018   |
| No                           | 319 902  | 1.2   | 1        | 1           |              |         |
| Yes                          | 73 286   | 1.2   | 0.99     | 1.12        | 1.02 to 1.24 |         |
| Liver fluke infection        |          |       |          |             |              | <0.001  |
| No                           | 113 178  | 1.2   | 1        | 1           |              |         |
| Yes                          | 68 979   | 1.5   | 1.24     | 1.25        | 1.12 to 1.39 |         |
| Praziquantel treatment       |          |       |          |             |              | 0.067   |
| None                         | 270 183  | 1.1   | 1        | 1           |              |         |
| One time                     | 84 136   | 1.3   | 1.20     | 0.85        | 0.75 to 0.95 |         |
| Two times                    | 18 126   | 1.5   | 1.33     | 0.93        | 0.79 to 1.10 |         |
| Three times                  | 5264     | 1.7   | 1.56     | 1.10        | 0.85 to 1.43 |         |
| More than three times        | 6414     | 1.8   | 1.63     | 1.26        | 1.00 to 1.59 |         |
| Smoking history              |          |       |          |             |              | <0.001  |
| No                           | 308 776  | 1.0   | 1        | 1           |              |         |
| Yes, current or previous     | 83 754   | 2.0   | 2.11     | 1.31        | 1.17 to 1.46 |         |
| Alcohol consumption history  |          |       |          |             |              | 0.002   |
| No                           | 214 495  | 1.0   | 1        | 1           |              |         |
| Yes, current or previous     | 178 564  | 1.4   | 1.45     | 1.17        | 1.06 to 1.29 |         |
| Hepatitis B virus            |          |       |          |             |              | 0.298   |

**Table 2** Prevalence, and crude and adjusted odd ratios of BDD associated factors and their 95% confidence interval

| Factors           | Subjects | % BDD | Crude OR | Adjusted OR | 95% CI       | P value |
|-------------------|----------|-------|----------|-------------|--------------|---------|
| No                | 382 058  | 1.2   | 1        | 1           |              |         |
| Yes               | 6803     | 1.4   | 1.13     | 1.16        | 0.88 to 1.52 |         |
| Hepatitis C virus |          |       |          |             |              | 0.124   |
| No                | 388 114  | 1.2   | 1        | 1           |              |         |
| Yes               | 747      | 2.0   | 1.69     | 1.69        | 0.87 to 3.31 |         |
| Diabetes mellitus |          |       |          |             |              | 0.011   |
| No                | 362 296  | 1.2   | 1        | 1           |              |         |
| Yes               | 26 565   | 1.6   | 1.37     | 1.20        | 1.04 to 1.37 |         |

509 N/A, Not applicable.

510

1  
2  
3  
4  
5  
6  
7  
8  
9  
10  
11  
12  
13  
14  
15  
16  
17  
18  
19  
20  
21  
22  
23  
24  
25  
26  
27  
28  
29  
30  
31  
32  
33  
34  
35  
36  
37  
38  
39  
40  
41  
42  
43  
44  
45  
46  
47  
48  
49  
50  
51  
52  
53  
54  
55  
56  
57  
58  
59  
60

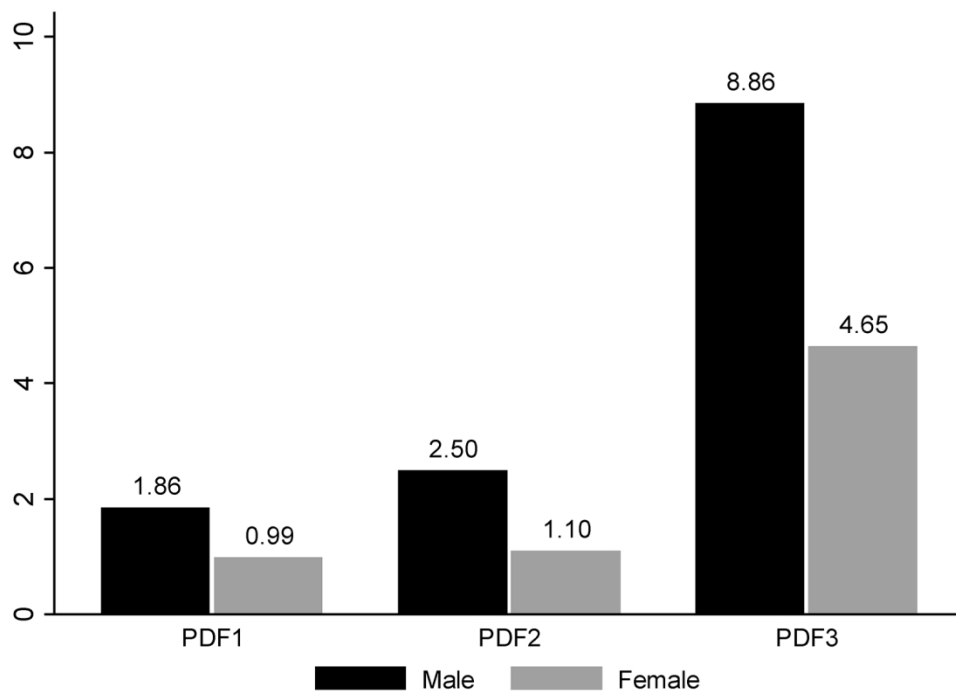

Figure 1 Percentage of BDD between male and female according to PDF1, 2, and 3.

143x104mm (300 x 300 DPI)

1  
2  
3  
4  
5  
6  
7  
8  
9  
10  
11  
12  
13  
14  
15  
16  
17  
18  
19  
20  
21  
22  
23  
24  
25  
26  
27  
28  
29  
30  
31  
32  
33  
34  
35  
36  
37  
38  
39  
40  
41  
42  
43  
44  
45  
46  
47  
48  
49  
50  
51  
52  
53  
54  
55  
56  
57  
58  
59  
60

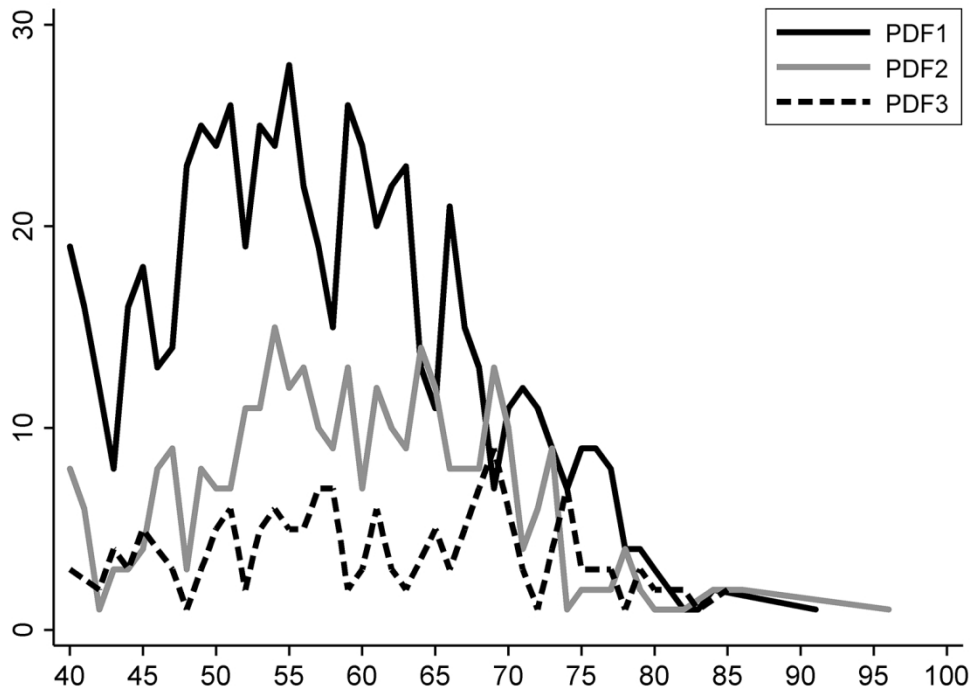

Figure 2 Number of BDD in PDF subjects by age range.  
141x103mm (300 x 300 DPI)

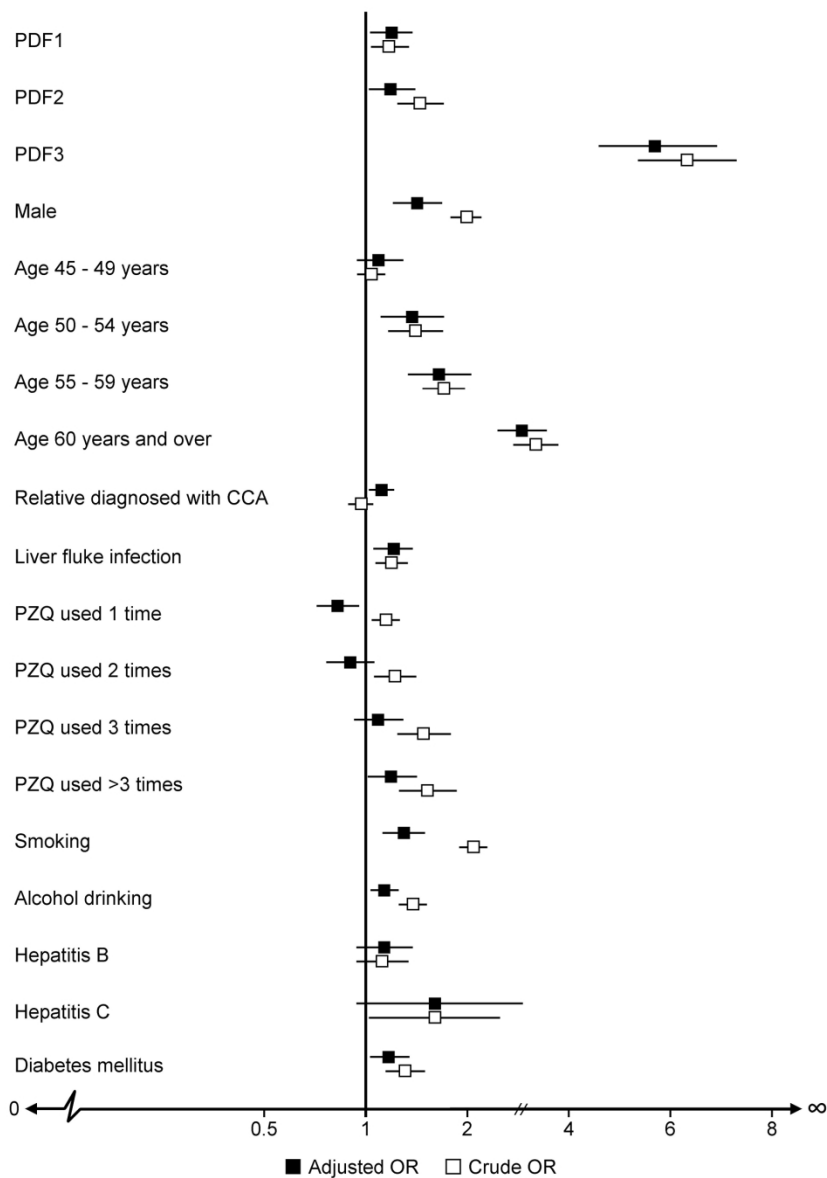

Figure 3 The adjusted OR and crude OR of the associated factors of BDD.

154x215mm (300 x 300 DPI)



## STROBE Statement—checklist of items that should be included in reports of observational studies

|                              | Item No                                                                                                      | Location                              | Recommendation                                                                                                                                                                             |
|------------------------------|--------------------------------------------------------------------------------------------------------------|---------------------------------------|--------------------------------------------------------------------------------------------------------------------------------------------------------------------------------------------|
| Title and abstract           | 1                                                                                                            | Pg3                                   | (a) Indicate the study's design with a commonly used term in the title or the abstract                                                                                                     |
|                              |                                                                                                              | Pg3                                   | (b) Provide in the abstract an informative and balanced summary of what was done and what was found                                                                                        |
| <b>Introduction</b>          |                                                                                                              |                                       |                                                                                                                                                                                            |
| Background/rationale         | 2                                                                                                            | Pgs5-6                                | Explain the scientific background and rationale for the investigation being reported                                                                                                       |
| Objectives                   | 3                                                                                                            | Pg6                                   | State specific objectives, including any prespecified hypotheses                                                                                                                           |
| <b>Methods</b>               |                                                                                                              |                                       |                                                                                                                                                                                            |
| Study design                 | 4                                                                                                            | Pgs 6-7                               | Present key elements of study design early in the paper                                                                                                                                    |
| Setting                      | 5                                                                                                            | Pgs 6-7                               | Describe the setting, locations, and relevant dates, including periods of recruitment, exposure, follow-up, and data collection                                                            |
| Participants                 | 6                                                                                                            | Pgs6-7                                | (a) <i>Cohort study</i> —Give the eligibility criteria, and the sources and methods of selection of participants. Describe methods of follow-up                                            |
|                              |                                                                                                              |                                       | <i>Case-control study</i> —Give the eligibility criteria, and the sources and methods of case ascertainment and control selection. Give the rationale for the choice of cases and controls |
|                              |                                                                                                              | N/A                                   | (b) <i>Cohort study</i> —For matched studies, give matching criteria and number of exposed and unexposed                                                                                   |
|                              |                                                                                                              |                                       | <i>Case-control study</i> —For matched studies, give matching criteria and the number of controls per case                                                                                 |
| Variables                    | 7                                                                                                            | Pg8                                   | Clearly define all outcomes, exposures, predictors, potential confounders, and effect modifiers. Give diagnostic criteria, if applicable                                                   |
| Data sources/<br>measurement | 8*                                                                                                           | Pgs7-8                                | For each variable of interest, give sources of data and details of methods of assessment (measurement). Describe comparability of assessment methods if there is more than one group       |
| Bias                         | 9                                                                                                            | Pg4                                   | Describe any efforts to address potential sources of bias                                                                                                                                  |
| Study size                   | 10                                                                                                           | Pg6-7                                 | Explain how the study size was arrived at                                                                                                                                                  |
| Quantitative variables       | 11                                                                                                           | Pg8-9                                 | Explain how quantitative variables were handled in the analyses. If applicable, describe which groupings were chosen and why                                                               |
| Statistical methods          | 12                                                                                                           | Pg8-9                                 | (a) Describe all statistical methods, including those used to control for confounding                                                                                                      |
|                              |                                                                                                              |                                       | N/A                                                                                                                                                                                        |
|                              |                                                                                                              | Pg9                                   | (c) Explain how missing data were addressed                                                                                                                                                |
|                              |                                                                                                              | N/A                                   | (d) <i>Cohort study</i> —If applicable, explain how loss to follow-up was addressed                                                                                                        |
|                              |                                                                                                              |                                       | <i>Case-control study</i> —If applicable, explain how matching of cases and controls was addressed                                                                                         |
|                              | <i>Cross-sectional study</i> —If applicable, describe analytical methods taking account of sampling strategy |                                       |                                                                                                                                                                                            |
|                              | N/A                                                                                                          | (e) Describe any sensitivity analyses |                                                                                                                                                                                            |

Continued on next page

For peer review only

1  
2  
3  
4  
5  
6  
7  
8  
9  
10  
11  
12  
13  
14  
15  
16  
17  
18  
19  
20  
21  
22  
23  
24  
25  
26  
27  
28  
29  
30  
31  
32  
33  
34  
35  
36  
37  
38  
39  
40  
41  
42  
43  
44  
45  
46  
47  
48  
49  
50  
51  
52  
53  
54  
55  
56  
57  
58  
59  
60

| Location         |     | Results                  |                                                                                                                                                                                                              |
|------------------|-----|--------------------------|--------------------------------------------------------------------------------------------------------------------------------------------------------------------------------------------------------------|
| Participants     | 13* | Pg9                      | (a) Report numbers of individuals at each stage of study—eg numbers potentially eligible, examined for eligibility, confirmed eligible, included in the study, completing follow-up, and analysed            |
|                  |     | N/A                      | (b) Give reasons for non-participation at each stage                                                                                                                                                         |
|                  |     | N/A                      | (c) Consider use of a flow diagram                                                                                                                                                                           |
| Descriptive data | 14* | Pg9                      | (a) Give characteristics of study participants (eg demographic, clinical, social) and information on exposures and potential confounders                                                                     |
|                  |     | Pgs22-24                 | (b) Indicate number of participants with missing data for each variable of interest                                                                                                                          |
|                  |     | N/A                      | (c) <i>Cohort study</i> —Summarise follow-up time (eg, average and total amount)                                                                                                                             |
| Outcome data     | 15* | Pgs9-10                  | <i>Cohort study</i> —Report numbers of outcome events or summary measures over time                                                                                                                          |
|                  |     | N/A                      | <i>Case-control study</i> —Report numbers in each exposure category, or summary measures of exposure                                                                                                         |
|                  |     | Pg25                     | <i>Cross-sectional study</i> —Report numbers of outcome events or summary measures                                                                                                                           |
| Main results     | 16  | Pgs9-10                  | (a) Give unadjusted estimates and, if applicable, confounder-adjusted estimates and their precision (eg, 95% confidence interval). Make clear which confounders were adjusted for and why they were included |
|                  |     | N/a                      | (b) Report category boundaries when continuous variables were categorized                                                                                                                                    |
|                  |     | N/a                      | (c) If relevant, consider translating estimates of relative risk into absolute risk for a meaningful time period                                                                                             |
| Other analyses   | 17  | N/A                      | Report other analyses done—eg analyses of subgroups and interactions, and sensitivity analyses                                                                                                               |
|                  |     | <b>Discussion</b>        |                                                                                                                                                                                                              |
| Key results      | 18  | Pg11-12                  | Summarise key results with reference to study objectives                                                                                                                                                     |
| Limitations      | 19  | Pg4                      | Discuss limitations of the study, taking into account sources of potential bias or imprecision. Discuss both direction and magnitude of any potential bias                                                   |
| Interpretation   | 20  | Pg14                     | Give a cautious overall interpretation of results considering objectives, limitations, multiplicity of analyses, results from similar studies, and other relevant evidence                                   |
| Generalisability | 21  | Pg14                     | Discuss the generalisability (external validity) of the study results                                                                                                                                        |
|                  |     | <b>Other information</b> |                                                                                                                                                                                                              |
| Funding          | 22  | Pg15                     | Give the source of funding and the role of the funders for the present study and, if applicable, for the original study on which the present article is based                                                |

\*Give information separately for cases and controls in case-control studies and, if applicable, for exposed and unexposed groups in cohort and cross-sectional studies.

**Note:** An Explanation and Elaboration article discusses each checklist item and gives methodological background and published examples of transparent reporting. The STROBE checklist is best used in conjunction with this article (freely available on the Web sites of PLoS Medicine at <http://www.plosmedicine.org/>, Annals of Internal Medicine at <http://www.annals.org/>, and Epidemiology at <http://www.epidem.com/>). Information on the STROBE Initiative is available at [www.strobe-statement.org](http://www.strobe-statement.org).

# BMJ Open

## Periductal fibrosis and bile duct dilatation: pathways to diagnosis for cholangiocarcinoma in Northeast Thailand

|                                 |                                                                                                                                                                                                                                                                                                                                                                                                                                                                                                                                                                                                                  |
|---------------------------------|------------------------------------------------------------------------------------------------------------------------------------------------------------------------------------------------------------------------------------------------------------------------------------------------------------------------------------------------------------------------------------------------------------------------------------------------------------------------------------------------------------------------------------------------------------------------------------------------------------------|
| Journal:                        | <i>BMJ Open</i>                                                                                                                                                                                                                                                                                                                                                                                                                                                                                                                                                                                                  |
| Manuscript ID                   | bmjopen-2018-023217.R1                                                                                                                                                                                                                                                                                                                                                                                                                                                                                                                                                                                           |
| Article Type:                   | Research                                                                                                                                                                                                                                                                                                                                                                                                                                                                                                                                                                                                         |
| Date Submitted by the Author:   | 30-Sep-2018                                                                                                                                                                                                                                                                                                                                                                                                                                                                                                                                                                                                      |
| Complete List of Authors:       | Chamadol, Nittaya; Khon Kaen University Faculty of Medicine Khuntikeo, Narong; Khon Kaen University Faculty of Medicine Thinkhamrop , Bandit; Faculty of Public Health, Khon Kaen University, Department of Biostatistics and Epidemiology Thinkamrop, Kavin; Faculty of Public Health, Khon Kaen University, Department of Biostatistics and Epidemiology Suwannatrai, Apiporn; Khon Kaen University Faculty of Medicine Kelly, Matthew; The Australian National University, Research School of Population Health Promthet, Supanee; Faculty of Public Health, Khon Kaen University, Department of Epidemiology |
| <b>Primary Subject Heading</b>: | Public health                                                                                                                                                                                                                                                                                                                                                                                                                                                                                                                                                                                                    |
| Secondary Subject Heading:      | Global health                                                                                                                                                                                                                                                                                                                                                                                                                                                                                                                                                                                                    |
| Keywords:                       | bile duct dilatation, periductal fibrosis, ULTRASONOGRAPHY, cholangiocarcinoma, screening, Thailand                                                                                                                                                                                                                                                                                                                                                                                                                                                                                                              |
|                                 |                                                                                                                                                                                                                                                                                                                                                                                                                                                                                                                                                                                                                  |

SCHOLARONE™  
Manuscripts

1  
2  
3 **1 TITLE PAGE**  
4

5  
6  
7 **2**

8 **3 Title:** Periductal fibrosis and bile duct dilatation: pathways to diagnosis for

9  
10  
11  
12  
13  
14  
15  
16  
17  
18  
19  
20  
21  
22  
23  
24  
25  
26  
27  
28  
29  
30  
31  
32  
33  
34  
35  
36  
37  
38  
39  
40  
41  
42  
43  
44  
45  
46  
47  
48  
49  
50  
51  
52  
53  
54  
55  
56  
57  
58  
59  
60  
4 cholangiocarcinoma in Northeast Thailand

5  
6 **6 Authors:** Nittaya Chamadol,<sup>1,2,3</sup> Narong Khuntikeo,<sup>1,2,4</sup> Bandit Thinkhamrop,<sup>1,2,5,6</sup> Kavin  
7 Thinkhamrop,<sup>1,2,6</sup> Apiporn T. Suwannatrai,<sup>1,2,7</sup> Matthew Kelly,<sup>8</sup> and Supanee Promthet<sup>1,5,9</sup>  
8

9  
10  
11  
12  
13  
14  
15  
16  
17  
18  
19  
20  
21  
22  
23  
24  
25  
26  
27  
28  
29  
30  
31  
32  
33  
34  
35  
36  
37  
38  
39  
40  
41  
42  
43  
44  
45  
46  
47  
48  
49  
50  
51  
52  
53  
54  
55  
56  
57  
58  
59  
60  
**9 Affiliations:**

10 <sup>1</sup>Cholangiocarcinoma Screening and Care Program (CASCAP), Khon Kaen University, Khon  
11 Kaen, Thailand.

12 <sup>2</sup>Cholangiocarcinoma Research Institute, Khon Kaen University, Khon Kaen, Thailand.

13 <sup>3</sup>Department of Radiology, Faculty of Medicine, Khon Kaen University, Khon Kaen,  
14 Thailand.

15 <sup>4</sup>Department of Surgery, Faculty of Medicine, Khon Kaen University, Khon Kaen, Thailand.

16 <sup>5</sup>Epidemiology and Biostatistics Section, Faculty of Public Health, Khon Kaen University,  
17 Khon Kaen, Thailand.

18 <sup>6</sup>Data Management and Statistical Analysis Center (DAMASAC), Faculty of Public Health,  
19 Khon Kaen University, Khon Kaen, Thailand.

20 <sup>7</sup>Department of Parasitology, Faculty of Medicine, Khon Kaen University, Khon Kaen,  
21 Thailand.

22 <sup>8</sup>Department of Global Health, Research School of Population Health, Australian National  
23 University, Canberra, Australia.

24 <sup>9</sup>ASEAN Cancer Epidemiology and Prevention Research Group, Khon Kaen University,  
25 Khon Kaen, Thailand.

1  
2  
3 26  
4

5 27 **Email address:**

6  
7 28 NC: Nittaya Chamadol (nittayachamadol@yahoo.com)

8  
9 29 NK: Narong Khuntikeo (nkhuntikeo@gmail.com)

10  
11 30 BT: Bandit Thinkhamrop (bandit@kku.ac.th)

12  
13 31 KT: Kavin Thinkhamrop (kvinth@gmail.com)

14  
15 32 ATS: Apiporn T. Suwannatrai (apiporn@kku.ac.th)

16  
17 33 MK: Matthew Kelly (matthew.kelly@anu.edu.au)

18  
19 34 SP: Supanee Promthet (supanee@kku.ac.th)

20  
21  
22 35  
23

24 36 **Corresponding authors:**

25  
26 37 Name: Supanee Promthet

27  
28 38 Address: ASEAN Cancer Epidemiology and Prevention Research Group,

29  
30  
31 39 Khon Kaen University, Khon Kaen 40002, Thailand.

32  
33 40 Telephone: +66-82 668 1995

34  
35 41 e-Mail: supanee@kku.ac.th

36  
37 42  
38

39 43 **Type of contribution:** Research article

40  
41 44 **Number of words in the abstract:** 298

42  
43 45 **Number of words in the text:** 3,086 (excluding references and tables)

44  
45 46 **Number of tables:** 2

46  
47 47 **Number of figures:** 3  
48  
49  
50  
51  
52  
53  
54  
55  
56  
57  
58  
59  
60

1  
2  
3 48 **ABSTRACT**

4  
5 49 **Objectives** To assess associations between periductal fibrosis (PDF) and bile duct dilatation  
6  
7 50 (BDD) in ultrasonography (US) screening of population at risk of cholangiocarcinoma (CCA)  
8  
9 51 due to residence in an endemic area for *Opisthorchis viverrini*. CCA survival rates are low  
10  
11 52 and early identification of risk factors is essential. BDD is one symptom which can identify  
12  
13 53 patients at risk of CCA. Detection of PDF by US can also identify at risk patients, at an  
14  
15 54 earlier stage of CCA development. Identification of association between PDF and BDD will  
16  
17 55 inform screening practices for CCA risk, by increasing the viability of PDF screening for  
18  
19 56 CCA risk.

20  
21  
22 57 **Setting** Nine tertiary care hospitals in Northeast Thailand.

23  
24 58 **Design** Cross-sectional study.

25  
26 59 **Participants** Study subjects in the Cholangiocarcinoma Screening and Care Program  
27  
28 60 (CASCAP) in Northeast Thailand. CASCAP inclusion criteria are all residents of Northeast  
29  
30 61 Thailand aged 40 years and over. Participants are recruited through CCA screening centers  
31  
32 62 and through primary health care units. So far 394 026 have been enrolled.

33  
34 63 **Methods** PDF and BDD were identified through US. PDF was categorized into three groups,  
35  
36 64 PDF1, 2 and 3, depending on their high echo locality in the peripheral, segmental and main  
37  
38 65 bile duct, respectively. Associations between PDF and BDD were determined by adjusted  
39  
40 66 odds ratio (OR) and 95% confidence interval (CI) using multiple logistic regression.

41  
42 67 **Results** BDD was found in 6.6% of PDF3, 1.7% of PDF2, and 1.4% of PDF1 cases. Among  
43  
44 68 PDF cases, especially in PDF3, BDD was found in male more than female (8.9% and 4.6%,  
45  
46 69 respectively). Compared to non-PDF, the association between PDF3 and BDD was highly  
47  
48 70 significant (adjusted OR=5.74, 95% CI 4.57 to 7.21, P<0.001).

1  
2  
3 71 **Conclusions** Our findings reveal that there is a relationship between PDF and BDD, which is  
4  
5 72 associated with CCA. Therefore, PDF can also be an indicator for suspected-CCA diagnosis  
6  
7 73 through US.  
8

9 74

10  
11 75 **Keywords** bile duct dilatation; periductal fibrosis; ultrasonography; cholangiocarcinoma;  
12  
13 76 screening; Thailand  
14

15  
16 77

17  
18 78 **Article summary**

19  
20 79 **Strengths and limitations of the study**

- 21  
22 80 • The large size of the study population and its geographic distribution across Northeast  
23  
24 81 Thailand are a significant strength.  
25  
26 82 • This is the first and largest screening program for cholangiocarcinoma (CCA) in an  
27  
28 83 area with the highest incidence in the world.  
29  
30 84 • CCA risk factors (PDF and BDD) were measured using ultrasonography by skilled  
31  
32 85 radiologists.  
33  
34 86 • Demographic, and some health, data were self-reported leading to potential bias in  
35  
36 87 measurement of liver fluke infection, praziquantel treatment, and pre-existing medical  
37  
38 88 conditions including HB, HC, and DM.  
39  
40 89 • Self-report could lead to prevalence underestimates due to the fact that subjects may  
41  
42 90 not have been willing to disclose sensitive or personal information.  
43  
44  
45

46 91

47  
48  
49 92



## 93 INTRODUCTION

94 Cholangiocarcinoma (CCA) and hepatocellular carcinoma (HCC), are ranked the most  
95 prevalent cancers in Southeast Asia.<sup>1-3</sup> The early-stages of CCA can manifest through  
96 obstructive jaundice, which is found in 30% of patients who are diagnosed with primary  
97 sclerosing cholangitis.<sup>4</sup> Other liver disorders: fatty liver disease, cirrhosis, and liver mass are  
98 likewise recognized risk factors for both CCA and HCC.<sup>5-10</sup> Suspected CCA cases can also be  
99 identified through the presence of bile duct dilatation (BDD), which can be identified in  
100 suspected CCA cases through ultrasonography (US) screening.<sup>11 12</sup> A previous study  
101 demonstrated that US screening is highly sensitive in identifying CCA through confirmed  
102 incidences of BDD.<sup>13</sup> However, upon the detection and diagnosis of bile duct and liver  
103 disorders, it is often too late to save patients with CCA and HCC due to the rapid progression  
104 to advanced stages of hepatic carcinoma.<sup>14</sup> As well, detection of BDD by US requires the  
105 services of specialist radiologists, who are generally only available in major hospitals,  
106 limiting access to screening. Thus, the best way to save a patient's life and prevent the  
107 likelihood of cancer development is through early, easily accessible, screenings to detect the  
108 risk factors that may lead to cancer among high-risk populations.

109 As well as BDD there are several other indicators for CCA risk including well-accepted  
110 premalignant lesions such as biliary intraepithelial neoplasm (BilIN), and intraductal  
111 papillary neoplasm of the bile duct (IPNB).<sup>15 16</sup> Periductal fibrosis (PDF) is another  
112 abnormality of the bile duct which has been used to identify people at risk of developing  
113 CCA. This hepatobiliary abnormality is particularly prominent among people infected with  
114 the liver fluke, *Opisthorchis viverrini*.<sup>17-21</sup> This infection is caused by the consumption of raw  
115 or lightly fermented fish products and is one of the key risk factors for development of CCA  
116 in the region. PDF is caused by the thickening of the bile duct wall, along the periportal  
117 space.<sup>22</sup>

1  
2  
3 118 The relationship between PDF and CCA is indicated by the regular detection of PDF in  
4  
5 119 confirmed CCA cases, and this has been particularly common in Northeast Thailand where  
6  
7 120 *O. viverrini* is endemic and a leading potential cause of CCA.<sup>8</sup> As a result of this relationship,  
8  
9 121 US detection has been utilized to identify people with PDF as a risk group for CCA  
10  
11 122 development.<sup>8 20 23 24</sup> Hepatobiliary abnormalities identified through ultrasound have been  
12  
13 123 shown in other studies to correlate well with histopathological confirmation making US a  
14  
15 124 valuable tool in early identification of these health issues.<sup>8</sup> Importantly, PDF can be identified  
16  
17 125 through US, but does not require the services of a specialist radiologist increasing the  
18  
19 126 potential access to screening, and PDF can be detected earlier than BDD allowing more  
20  
21 127 effective intervention.  
22  
23

24 128 The potential to detect the risk of CCA earlier and without the need for specialist  
25  
26 129 radiologists, through the identification of PDF may be an important breakthrough in reducing  
27  
28 130 CCA incidence. So, both PDF and BDD have been recognized as indicators of CCA<sup>8 17</sup>, but  
29  
30 131 their relationship to one another has yet to be established or even studied in depth.  
31  
32 132 Determining their relationship, such as learning if one precedes the other may make a  
33  
34 133 significant change in how we screen for CCA via US. Therefore, this study seeks to  
35  
36 134 determine if there is an association between PDF and BDD among people at a high-risk CCA  
37  
38 135 population in Northeast Thailand. The results of this work will clarify necessary directions  
39  
40 136 toward early screening methodologies and appropriate cancer treatment.  
41  
42  
43

44 137

## 45 138 **METHODS**

### 46 139 **Study design**

47  
48 140 This study presents data collected from the Cholangiocarcinoma Screening and Care Program  
49  
50 141 (CASCAP) in Northeast Thailand. CASCAP is a prospective cohort study that is considered  
51  
52 142 the first project for CCA screening in a high-risk population with a community-based bottom-  
53  
54  
55  
56  
57  
58  
59  
60

1  
2  
3 143 up approach.<sup>25</sup> Although this overall project is a prospective cohort study, the results  
4  
5 144 presented here use cross sectional data from the baseline study carried out with participants.

6  
7 145

8  
9 146 The overall aim of the study is to recruit all adults aged 40 years or over who reside in  
10  
11 147 Northeast Thailand and to screen them for cholangiocarcinoma and its risk factors in terms of  
12  
13 148 hepatobiliary abnormalities and infection with the liver fluke *Opisthorchis viverrini*. As such  
14  
15  
16 149 there are no strict inclusion or exclusion criteria apart from age group and place of residence.  
17  
18 150 Once consent has been obtained, the participants will be enrolled in the program. The  
19  
20 151 primary place of recruitment for this cohort study were 9 tertiary care hospitals in the  
21  
22 152 Northeast of Thailand. These hospitals serve as the main source of affordable tertiary care for  
23  
24 153 local people in the region. Subjects were recruited at these hospitals in two ways. Firstly the  
25  
26 154 screening group comprised individuals who had attended the hospital for other reasons and  
27  
28 155 were invited to receive ultrasound screening without evidencing any symptoms. The second  
29  
30 156 group, the walk-in group, were individuals who were attending the hospital because of CCA  
31  
32 157 symptoms and this group can then receive treatment. All participants were asked to join the  
33  
34 158 project by signing a consent form. All CCA patients were diagnosed and treated according to  
35  
36 159 routine, real world clinical practice by participating hospitals. Patients were followed-up and  
37  
38 160 provided with either clinical or palliative care depending on the stage of their disease.  
39  
40 161 Treatment outcomes were recorded. Follow-up took place every 3-6 months depending on the  
41  
42 162 patient's condition and unless scheduled otherwise.

43  
44  
45 163

#### 46 47 48 164 **Study population**

49  
50 165 Our study recruited subjects from among people who participated the CASCAP project.  
51  
52 166 These subjects form two groups (screening and walk-in). The screening group was people  
53  
54 167 who have undergone routine US and who showed no symptoms that could be related to CCA.  
55  
56  
57  
58  
59  
60

1  
2  
3 168 The walk-in group was people who come to the hospital with symptoms indicating CCA  
4  
5 169 which has been diagnosed with US. The subjects included in our study only those enrolled in  
6  
7 170 the CASCAP database from 2013-2017 with a total of 394 026 subjects.  
8  
9

10 171

## 12 172 **Patient and Public Involvement**

13  
14  
15 173 The CASCAP project is a comprehensive screening and treatment program for CCA.  
16  
17 174 Members of the public were first involved in the research in two ways. Firstly when members  
18  
19 175 of the public attended a participating hospital for any reason, hospital staff would actively  
20  
21 176 recruit them to the study. Village health volunteers also recruited participants while carrying  
22  
23 177 out their work. A second group were those who already has some suspected symptoms and  
24  
25 178 attended a hospital for screening at which point they were recruited into the study. The study  
26  
27 179 participants were not directly involved in the design of the study. Participants will be  
28  
29 180 contacted at least annually to be screened for CCA risk. Patients identified as having CCA  
30  
31 181 will receive standard care for the condition through the project. For the screening procedures  
32  
33 182 covered by this report participants are informed of the purpose, outcomes and implications of  
34  
35 183 these procedures.  
36  
37  
38

39 184

## 41 185 **Main outcome and independent variables**

42  
43 186 The primary outcome for this study was BDD which was categorized into two groups  
44  
45 187 (no/yes). The independent variable of interest was PDF. We classify PDF into 3 categories  
46  
47 188 (PDF1, 2 and 3) using a World Health Organization standard methodology originally  
48  
49 189 developed for use in the assessment of schistosomal periportal fibrosis (PPF) but which is  
50  
51 190 also valid for the study of PDF given that PPF and PDF have the same ultrasound images of  
52  
53 191 Increased Periportal Echo.<sup>26</sup> We only use 3 of the 5 classifications utilized in this  
54  
55 192 methodology since anatomically extra and intra hepatic bile ducts run in parallel to the portal  
56  
57  
58

1  
2  
3 193 vein in the periportal space, so the pathology of the bile duct should be detected first in the  
4  
5 194 periportal space. This identification system has been validated by comparing US diagnoses  
6  
7 195 with histopathologically proven cases of PDF with good agreement between the methods.<sup>8</sup>  
8  
9 196 Using this system PDF is categorized based on the anatomical location of the intrahepatic and  
10  
11 197 extrahepatic bile duct. PDF1 is defined as having a high echo in the wall of small bile ducts  
12  
13 198 scattered in the liver as a starry sky pattern, PDF2 is a high echo along the segmental bile  
14  
15 199 duct wall running parallel with the portal vein, and PDF3 is a high echo along the main bile  
16  
17 200 duct wall running parallel with the portal vein in the periportal space.<sup>19</sup>  
18  
19  
20 201 Both BDD and PDF diagnosed via US by radiologists from the CASCAP project all of whom  
21  
22 202 took part in a special training course for ultrasound examination including all criteria to  
23  
24 203 diagnose hepatobiliary abnormalities. A teleconsultation system was also set up to confirm  
25  
26 204 diagnoses from radiologists. Demographic characteristics of PDF and non-PDF subjects were  
27  
28 205 the independent variables includes gender, age, education levels, occupations, having a  
29  
30 206 relative diagnosed with CCA, liver fluke infection, praziquantel (PZQ) treatments, smoking  
31  
32 207 (current or previous), alcohol consumption (current or previous) and diagnosis with hepatitis  
33  
34 208 B (HB), hepatitis C (HC), and diabetes mellitus (DM). All demographic characteristics listed  
35  
36 209 above were collected via face-to-face interview by interviewer from the CASCAP using  
37  
38 210 questionnaire.  
39  
40  
41  
42 211

### 43 212 **Statistical analysis**

44  
45  
46 213 The demographic characteristics that were categorical data were summarized using  
47  
48 214 frequencies and percentages (i.e. gender, age groups, education levels, occupations, having a  
49  
50 215 relative diagnosed with CCA, liver fluke infection, PZQ treatments, smoking history, alcohol  
51  
52 216 consumption history and diagnosis with HB, HC, DM, and PDFs). The continuous data, such  
53  
54  
55  
56  
57  
58  
59  
60

1  
2  
3 217 as the age of the subjects, were summarized by their mean, standard deviation, median,  
4  
5 218 minimum and maximum range.

6  
7 219 The prevalence of BDD was calculated and the percentage of the prevalence was  
8  
9 220 computed based on a normal approximation to a binomial distribution. Bivariate analysis  
10  
11 221 using simple logistic regression was performed to investigate the association between the  
12  
13 222 independent factors listed above and BDD. They were determined by crude odds ratio (OR)  
14  
15 223 and their 95% confidence intervals (CI). Then multivariable analysis using multiple logistic  
16  
17 224 regression was carried out to investigate the association between PDF and BDD as  
18  
19 225 determined by the adjusted OR and 95% CI. The final multivariate model was adjusted for all  
20  
21 226 factors which previous studies have reported to be associated with the hepatobiliary disease:  
22  
23 227 PDF, gender, age, education levels, occupations, having a relative diagnosed with CCA, liver  
24  
25 228 fluke infection, PZQ treatments, smoking, alcohol consumption as well as diagnosis with HB,  
26  
27 229 HC, and DM.

28  
29  
30  
31 230 There were missing values for some variables due to unwillingness of some participants  
32  
33 231 to answer some socio-demographic or health history questions or from errors in data  
34  
35 232 collection. Missing values for most variables were rare with proportions missing less than 3%  
36  
37 233 of participants. The only variable with a significant proportion of missing values was that of  
38  
39 234 previous liver fluke diagnosis (n=211 869), but this number includes those who had reported  
40  
41 235 never having been tested for infection.

42  
43  
44 236 All test statistics were two-tailed and a p-value of less than 0.05 was considered  
45  
46 237 statistically significant. All analyses were performed by using a statistical package, Stata  
47  
48 238 version 15 (StataCorp, College Station, Texas, USA).

49  
50 239

## 51 52 240 **RESULTS**

### 53 54 241 **Descriptive summary**

1  
2  
3 242 The demographic characteristics of subjects were presented as numbers and percentages. A  
4  
5 243 total of 394 026 subjects who underwent US screenings for CCA were enrolled in our study.  
6  
7 244 The subjects were all between the ages of 40-100 years old and reported a mean age of  
8  
9 245 54.92±9.03 years old. Of these, approximately two-thirds were female (61.4%) and the  
10  
11 246 majority of them completed primary school education level (72.9%) and worked as farmers  
12  
13 247 (77.9%). About one-third (29.7%) had ever used PZQ treatment, and about one-fourth  
14  
15 248 (21.3%) reported being a smoker or ex-smoker. The data of PDF diagnosis, 17.6% have  
16  
17 249 positive diagnosed and the highest percentage was in subjects diagnosed with PDF1 (12.3%)  
18  
19 250 while only 0.6% for PDF3 (table 1).  
20  
21

251

252 &lt;Table 1 located here&gt;

253

### 254 **Prevalence of BDD**

255 From this study, the overall prevalence of BDD was reported to be 1.2%. The highest  
256 prevalence of BDD was 6.6% from the PDF3 group under periductal fibrosis. PDF1 and  
257 PDF2 subjects reported a low prevalence rate of only 1.4% and 1.7%, respectively (table 2).  
258 Our study found that the prevalence of BDD occurring in PDF subjects was high in male  
259 more than female, particularly in PDF3 (8.9% and 4.6%, respectively) (figure 1). Meanwhile,  
260 we also found the number of BDD in PDF1 subjects was highest among people aged 55 years  
261 old (figure 2).

262

### 263 **Associations with BDD**

#### 264 **Bivariate analysis**

265 The crude analysis using simple logistic regression found the variable with the strongest  
266 association to BDD to be PDF3 compared to non-PDF (OR=6.35, 95% CI 5.40 to 7.46,

1  
2  
3 267 P<0.001). Other factors that were significantly associated with BDD included: gender, with  
4  
5 268 male being more affected by BDD than female; age, with a progressively increasing OR;  
6  
7 269 lower education levels; occupations that was unemployed; infected liver fluke; PZQ used,  
8  
9 270 with a progressively increasing OR; having a history of smoking and alcohol consumption;  
10  
11 271 being positive for DM diagnosis (table 2).

12  
13  
14 272

### 15 273 **Multivariable analysis**

16  
17  
18 274 Through the multivariable analysis using multiple logistic regression, all factors were  
19  
20 275 adjusted and the association of PDF3 subjects having BDD remained significantly high  
21  
22 276 compared with non-PDF subjects (adjusted OR=5.74, 95% CI 4.57 to 7.21, P<0.001) (table  
23  
24 277 2). Compared to crude OR, the adjusted OR of gender, age, occupations, liver fluke infection,  
25  
26 278 smoking history and alcohol consumption history, and a positive diagnosis of DM remained  
27  
28 279 statistically significant, while a positive diagnosis of HB and HC remained non-significant  
29  
30 280 (figure 3). Our study also found that relatives diagnosed with CCA changed from non-  
31  
32 281 significant in bivariate analysis to significant in multivariable analysis, while education levels  
33  
34 282 and PZQ treatment changed from significant to non-significant.

35  
36  
37 283

38  
39 284 <Table 2 located here>

40  
41  
42 285

43  
44 286 <Figure 1 located here>

45  
46 287

47  
48 288 <Figure 2 located here>

49  
50 289

51  
52 290 <Figure 3 located here>

53  
54  
55 291



1  
2  
3 292 **DISCUSSION**

4  
5 293 Liver cancer is one of the leading causes of death throughout the world.<sup>27</sup> CCA accounts for  
6  
7 294 more than 60% of these liver cancer cases with Northeast Thailand reporting the highest  
8  
9 295 incidence in the world.<sup>28 29</sup> PDF and BDD have been recognized as the key risk factors of  
10  
11 296 CCA development.<sup>8 17 21</sup> Due to ambiguities in the relationship between PDF and BDD, our  
12  
13 297 study investigated the prevalence of PDF and BDD in a high-risk CCA population to find if  
14  
15 298 there was a presence of a statistically significant relationship between the two factors. Our  
16  
17 299 study specifically found that the prevalence of BDD was significantly higher (6.6%) among  
18  
19 300 subjects who were diagnosed with PDF3 and it was the most statistically significant  
20  
21 301 associated factor of BDD (adjusted OR=5.74, 95% CI 4.57 to 7.21, P<0.001). Although a  
22  
23 302 study conducted in Japan, concluded fibrosis and BDD as being indicators of CCA, they did  
24  
25 303 not mention an association between them.<sup>17</sup> In addition, studies conducted in Thailand report  
26  
27 304 only PDF as a major risk factor of CCA development.<sup>8 21 30</sup>

28  
29  
30  
31 305 We conducted a bivariate analysis via a simple logistic regression and found that gender,  
32  
33 306 age, and smoking history were the three most significant factors associated with BDD and  
34  
35 307 remained significant in the multivariable analysis. The factor of relatives diagnosed with  
36  
37 308 CCA became significant in multivariable analysis, but the magnitude of association was still  
38  
39 309 relatively low, while education levels and PZQ treatment became non-significant. The other  
40  
41 310 factors that were statistically significant in the bivariate analysis became less significant after  
42  
43 311 adjusting for all factors in the multivariable analysis included occupations, alcohol  
44  
45 312 consumption history, and being diagnosed with DM. Consistent with other studies,<sup>17-21</sup> our  
46  
47 313 results also found a significant association between current liver fluke infection and BDD.  
48  
49 314 Liver fluke infection in Northeast Thailand mainly results from the consumption of raw or  
50  
51 315 insufficiently fermented fish and is one of the main established risk factors for BDD and  
52  
53 316 CCA development.  
54  
55  
56  
57  
58  
59  
60

1  
2  
3 317 Our study found that those aged 60-years-old and over are more likely to have BDD than  
4  
5 318 other age groups. Meanwhile, our study also found the association of BDD increased with  
6  
7 319 increasing age. We conclude that age plays a role in BDD development. This result is similar  
8  
9 320 to a study conducted in Israel between 2001-2002 which found that bile duct size increases  
10  
11 321 with age and reported age was positively correlated with bile duct size.<sup>31</sup> A study from  
12  
13 322 Canada in 2014 found that older age was associated with bile duct diameters which increases  
14  
15 323 with age.<sup>32</sup> Therefore, it is not a surprise that those who were in the oldest age group in our  
16  
17 324 study had a strong association with BDD, which causes the bile duct to grow.

18  
19  
20 325 Subjects positive for HB and HC diagnosis demonstrated a non-significant association  
21  
22 326 with BDD (adjusted OR=1.16, 95% CI 0.88 to 1.52, P=0.298 and adjusted OR=1.69, 95% CI  
23  
24 327 0.87 to 3.31, P=0.124, respectively). Our findings are close to results reported by Barusrux  
25  
26 328 and colleagues in 2012 which found that HB and HC were not related to CCA.<sup>33</sup> However, it  
27  
28 329 is also important to mention contradictory results reported in South Korea which found that  
29  
30 330 HBV infection was a significant risk factor for intrahepatic cholangiocarcinoma (ICC)  
31  
32 331 development with OR=2.3, 95% CI 1.6 to 3.3 P<0.05.<sup>34</sup> HBV infection was also related to a  
33  
34 332 3.4-fold risk of ICC in China.<sup>35</sup> Another study conducted in Northeast Thailand in 2010,  
35  
36 333 examined the association of HB and HC with CCA and reported a greater risk of CCA for  
37  
38 334 those carrying the virus (OR=4, 95% CI 1.29 to 16.44, P<0.05).<sup>36</sup>

39  
40  
41 335 And interestingly, those who had CCA diagnosed relatives, had a higher association to  
42  
43 336 BDD than those who did not have CCA diagnosed relatives only 12% (adjusted OR=1.12,  
44  
45 337 95% CI 1.02 to 1.24, P=0.018). However, our results were consistent with Zhou et al. (2014),  
46  
47 338 who identified genetic and familial risk factors as significantly contributing to the  
48  
49 339 development of combined HCC-CCA through a bivariate analysis.<sup>37</sup> It is worth mentioning  
50  
51 340 that this significance could not be confirmed through a multivariable analysis. Other studies  
52  
53 341 also demonstrate that having a family history of cancer is a significant associated factor for  
54  
55  
56  
57  
58  
59  
60

1  
2  
3 342 CCA development.<sup>38 39</sup> A risk factor study of CCA in Northeast Thailand also reported  
4  
5 343 patients who had a family history of cancer were more likely to develop CCA than those  
6  
7 344 without a family history of liver cancer.<sup>40</sup> Death or traumatic incidences influence the  
8  
9 345 decision-making process. This may be the reason behind the lack of association between  
10  
11 346 family history of CCA and BDD in our statistical analysis. Perhaps family members who  
12  
13 347 experience a death of CCA-diagnosed family member are more likely to take measures in  
14  
15 348 preventing the occurrence of a second CCA incidence in the family. A CCA traumatic  
16  
17 349 experience may have served as a warning for family members to avoid this rapid and fatal  
18  
19 350 outcome. These results reveal the complicated nature of understanding the true risk factors of  
20  
21 351 CCA and pathogenesis to hepatic carcinoma in certain Asian societies.

22  
23  
24 352 This study has some limitations. Firstly, although large, the study population is not  
25  
26 353 representative of the overall population of Northeast Thailand. The recruitment method,  
27  
28 354 through tertiary hospitals, may mean that the study population has some underlying  
29  
30 355 differences in health status from the general population. In particular the prevalence of BDD  
31  
32 356 and PDF in the study group is likely to vary from overall population prevalence. However,  
33  
34 357 the study has internal validity meaning relationships found between the various hepatobiliary  
35  
36 358 abnormalities and other predictive factors are still important and useful. Also, many of the  
37  
38 359 risk factors including history of previous liver fluke infection (and PZQ treatment) as well as  
39  
40 360 health behaviors in terms of smoking and alcohol consumption were self-reported leading to  
41  
42 361 some potential bias in their measurements.

43  
44  
45 362

## 46 47 48 363 **CONCLUSIONS**

49  
50 364 In conclusion, our key findings included identifying the factors associated with biliary tract  
51  
52 365 disease in a high-risk population for CCA: PDF3, male gender, older age, having CCA-  
53  
54 366 diagnosed relatives, infected liver fluke, and smoking history. Based on our results, patients

1  
2  
3 367 should be considered suspected-CCA cases during US screenings in high-risk areas through  
4  
5 368 the detection of PDF, old age (50 and over), if they were infected for liver fluke, have CCA-  
6  
7 369 diagnosed relatives, and are current or previous smokers. The interesting results regarding  
8  
9 370 HB and HC diagnoses may need further evaluation and review due to some contradictions in  
10  
11 371 the data. Greater consideration toward CCA and HCC prevention should be aimed at those in  
12  
13 372 older age groups. Despite certain limitations, our data was based on a very large sample size  
14  
15 373 and suggests a statistically robust association between PDF and BDD, specifically the PDF3  
16  
17 374 grouping. Early and routine screening of BDD and PDF may provide a means to reduce the  
18  
19 375 incidence of liver-related diseases and CCA. Future planning of CCA surveillance should  
20  
21 376 focus on early screening for both PDF and BDD.  
22  
23  
24  
25

377

### 378 **Recommendations**

379 This study was conducted in Northeast Thailand and may not reflect the general population.  
380 Further study is necessary in the region to test the generality of our results. Nevertheless, the  
381 methodology and results of our study can be used as a guideline in formulating clinical  
382 practice and future research priorities.  
383

383

### 384 **List of abbreviations**

385 BDD, Bile duct dilatation; CASCAP, Cholangiocarcinoma Screening and Care Program;  
386 CCA, Cholangiocarcinoma; CI, Confidence interval; DM, Diabetes mellitus, HB, Hepatitis  
387 B; HC, Hepatitis C; HCC, Hepatocellular carcinoma; ICC, Intrahepatic cholangiocarcinoma;  
388 N/A, Not applicable; OR, Odds ratios; PDF, Periductal fibrosis; PZQ, Praziquantel; US,  
389 Ultrasonography; WHO, World Health Organization.  
390

390

### 391 **Conflict of interest**

1  
2  
3 392 All authors declare no conflict of interest.  
4

5 393

6  
7 394 **Acknowledgements** This study was supported by Khon Kaen University (KKU) through  
8  
9 395 CASCAP project and the National Research Council of Thailand through the Medical  
10  
11 396 Research Network of the Consortium of Thai Medical Schools. The study was also supported  
12  
13 397 by the Data Management and Statistical Analysis Center (DAMASAC), Faculty of Public  
14  
15 398 Health, KKU, Thailand. We would like to acknowledge and thank Dr.Malcolm Anthony  
16  
17 399 Moore for his comments and suggestions over the final version of the manuscript.  
18  
19

20 400

21  
22 401 **Author contributions** NC, SP, and KT conceived and designed this study. KT and BT  
23  
24 402 performed the analysis. NC, SP, NK, BT, KT, ATS and MK wrote the manuscript. NC, NK,  
25  
26 403 BT and KT collected the data and generated the clinical database. All authors have been  
27  
28 404 involved in revising the manuscript, and all authors have read and approved the final  
29  
30 405 manuscript.  
31  
32

33 406

34  
35  
36 407 **Funding** This work was supported by Khon Kaen University through CASCAP (Grant No .  
37  
38 408 CASCAP 1/60), the National Research Council of Thailand through the Medical Research  
39  
40 409 Network of the Consortium of Thai Medical Schools (Grant No .MRF.59-076) and National  
41  
42 410 Research Council of Thailand (NRCT/2559-134).  
43  
44

45 411

46  
47 412 **Competing interests** The authors declare that they have no competing interests.  
48

49 413

50  
51 414 **Patient consent** All patients gave written informed consent for the study.  
52

53 415  
54  
55  
56  
57  
58  
59  
60

1  
2  
3 416 **Ethics approval** The research protocol was approved by Khon Kaen University Ethics  
4  
5 417 Committee for Human Research, reference number HE591067.

6  
7 418

8  
9 419 **Provenance and peer review** Not commissioned; externally peer reviewed.  
10

11 420

12  
13 421 **Data sharing statement** No additional data are available.  
14

15 422

16 423

17  
18  
19  
20 424 **REFERENCES**

- 21  
22 425 1. Moore MA, Attasara P, Khuhaprema T, et al. Cancer epidemiology in mainland South-  
23  
24 426 East Asia - past, present and future. *Asian Pacific journal of cancer prevention : APJCP*  
25  
26 427 2010;11 Suppl 2:67-80.  
27  
28 428 2. Moore MA, Manan AA, Chow KY, et al. Cancer epidemiology and control in peninsular  
29  
30 429 and island South-East Asia - past, present and future. *Asian Pacific journal of cancer*  
31  
32 430 *prevention : APJCP* 2010;11 Suppl 2:81-98.  
33  
34 431 3. National Cancer Institue. Hospital based cancer registry annual report 2012. Bangkok:  
35  
36 432 Eastern Printing Public Company Limited PCL.157 2012.  
37  
38 433 4. Rosen CB, Nagorney DM, Wiesner RH, et al. Cholangiocarcinoma complicating primary  
39  
40 434 sclerosing cholangitis. *Annals of surgery* 1991;213(1):21-5.  
41  
42 435 5. Songserm N, Promthet S, Sithithaworn P, et al. Risk factors for cholangiocarcinoma in  
43  
44 436 high-risk area of Thailand: role of lifestyle, diet and methylenetetrahydrofolate reductase  
45  
46 437 polymorphisms. *Cancer epidemiology* 2012;36(2):e89-94. doi:  
47  
48 438 10.1016/j.canep.2011.11.007  
49  
50 439 6. Tao LY, He XD, Qu Q, et al. Risk factors for intrahepatic and extrahepatic  
51  
52 440 cholangiocarcinoma: a case-control study in China. *Liver international : official journal*

- 1  
2  
3 441 *of the International Association for the Study of the Liver* 2010;30(2):215-21. doi:  
4  
5 442 10.1111/j.1478-3231.2009.02149.x  
6  
7 443 7. Shaib YH, El-Serag HB, Nooka AK, et al. Risk factors for intrahepatic and extrahepatic  
8  
9 444 cholangiocarcinoma: a hospital-based case-control study. *The American journal of*  
10  
11 445 *gastroenterology* 2007;102(5):1016-21. doi: 10.1111/j.1572-0241.2007.01104.x  
12  
13 446 8. Chamadol N, Pairojkul C, Khuntikeo N, et al. Histological confirmation of periductal  
14  
15 447 fibrosis from ultrasound diagnosis in cholangiocarcinoma patients. *Journal of hepato-*  
16  
17 448 *biliary-pancreatic sciences* 2014;21(5):316-22. doi: 10.1002/jhbp.64  
18  
19  
20 449 9. Welzel TM, Graubard BI, El-Serag HB, et al. Risk factors for intrahepatic and  
21  
22 450 extrahepatic cholangiocarcinoma in the United States: a population-based case-control  
23  
24 451 study. *Clinical gastroenterology and hepatology : the official clinical practice journal of*  
25  
26 452 *the American Gastroenterological Association* 2007;5(10):1221-8. doi:  
27  
28 453 10.1016/j.cgh.2007.05.020  
29  
30  
31 454 10. Shaib YH, El-Serag HB, Davila JA, et al. Risk factors of intrahepatic cholangiocarcinoma  
32  
33 455 in the United States: a case-control study. *Gastroenterology* 2005;128(3):620-6.  
34  
35 456 11. Hamilton SR, Aaltonen LA. Pathology and genetics of tumours of the digestive system.  
36  
37 457 France: Lyon : Oxford : IARC Press ; Oxford University Press (distributor). 2000.  
38  
39 458 12. Khan SA, Davidson BR, Goldin RD, et al. Guidelines for the diagnosis and treatment of  
40  
41 459 cholangiocarcinoma: an update. *Gut* 2012;61(12):1657-69. doi: 10.1136/gutjnl-2011-  
42  
43 460 301748  
44  
45  
46 461 13. Saini S. Imaging of the hepatobiliary tract. *The New England journal of medicine*  
47  
48 462 1997;336(26):1889-94. doi: 10.1056/NEJM199706263362607  
49  
50 463 14. Blechacz B, Gores GJ. Cholangiocarcinoma: advances in pathogenesis, diagnosis, and  
51  
52 464 treatment. *Hepatology* 2008;48(1):308-21. doi: 10.1002/hep.22310  
53  
54  
55  
56  
57  
58  
59  
60

- 1  
2  
3 465 15. Zen Y, Adsay NV, Bardadin K, et al. Biliary intraepithelial neoplasia: an international  
4  
5 466 interobserver agreement study and proposal for diagnostic criteria. *Modern pathology* :  
6  
7 467 *an official journal of the United States and Canadian Academy of Pathology, Inc*  
8  
9 468 2007;20(6):701-9. doi: 10.1038/modpathol.3800788  
10  
11 469 16. Nakanuma Y, Sasaki M, Sato Y, et al. Multistep carcinogenesis of perihilar  
12  
13 470 cholangiocarcinoma arising in the intrahepatic large bile ducts. *World journal of*  
14  
15 471 *hepatology* 2009;1(1):35-42. doi: 10.4254/wjh.v1.i1.35  
16  
17  
18 472 17. Maetani Y, Itoh K, Watanabe C, et al. MR imaging of intrahepatic cholangiocarcinoma  
19  
20 473 with pathologic correlation. *AJR American journal of roentgenology* 2001;176(6):1499-  
21  
22 474 507. doi: 10.2214/ajr.176.6.1761499  
23  
24 475 18. National Cancer Institue. Guidelines for screening, diagnosis and treatment of liver  
25  
26 476 cancer and cholangiocarcinoma. Bangkok: National Office of Buddhism 2011:81.  
27  
28  
29 477 19. Nittaya Chamadol. Imaging in Cholangiocarcinoma. Khon Kaen, Thailand: Department  
30  
31 478 of Radiology, Faculty of Medicine, Khon Kaen University, Khon Kaen, Thailand 2014.  
32  
33 479 20. Xu HX, Chen LD, Liu LN, et al. Contrast-enhanced ultrasound of intrahepatic  
34  
35 480 cholangiocarcinoma: correlation with pathological examination. *The British journal of*  
36  
37 481 *radiology* 2012;85(1016):1029-37. doi: 10.1259/bjr/21653786  
38  
39 482 21. Sripa B, Mairiang E, Thinkhamrop B, et al. Advanced periductal fibrosis from infection  
40  
41 483 with the carcinogenic human liver fluke *Opisthorchis viverrini* correlates with elevated  
42  
43 484 levels of interleukin-6. *Hepatology* 2009;50(4):1273-81. doi: 10.1002/hep.23134  
44  
45  
46 485 22. Benedetti NJ, Desser TS, Jeffrey RB. Imaging of hepatic infections. *Ultrasound Q*  
47  
48 486 2008;24(4):267-78. doi: 10.1097/RUQ.0b013e31818e5981  
49  
50 487 23. Loria F, Loria G, Basile S, et al. Contrast-enhanced ultrasound appearances of  
51  
52 488 enhancement patterns of intrahepatic cholangiocarcinoma: correlation with pathological  
53  
54 489 findings. *Updates in surgery* 2014;66(2):135-43. doi: 10.1007/s13304-014-0251-6  
55  
56  
57  
58  
59  
60



- 1  
2  
3 490 24. Elkins DB, Mairiang E, Sithithaworn P, et al. Cross-sectional patterns of hepatobiliary  
4  
5 491 abnormalities and possible precursor conditions of cholangiocarcinoma associated with  
6  
7 492 *Opisthorchis viverrini* infection in humans. *The American journal of tropical medicine*  
8  
9 493 *and hygiene* 1996;55(3):295-301.  
10  
11 494 25. Khuntikeo N, Chamadol N, Yongvanit P, et al. Cohort profile: cholangiocarcinoma  
12  
13 495 screening and care program (CASCAP). *BMC cancer* 2015;15:459. doi: 10.1186/s12885-  
14  
15 496 015-1475-7  
16  
17 497 26. Berhe N, Geitung JT, Medhin G, et al. Large scale evaluation of WHO's ultrasonographic  
18  
19 498 staging system of schistosomal periportal fibrosis in Ethiopia. *Tropical Medicine &*  
20  
21 499 *International Health* 2006;11(8):1286-94. doi: DOI 10.1111/j.1365-3156.2006.01665.x  
22  
23 500 27. Ferlay J, Soerjomataram I, Dikshit R, et al. Cancer incidence and mortality worldwide:  
24  
25 501 sources, methods and major patterns in GLOBOCAN 2012. *International journal of*  
26  
27 502 *cancer Journal international du cancer* 2015;136(5):E359-86. doi: 10.1002/ijc.29210  
28  
29 503 28. Sripa B, Pairojkul C. Cholangiocarcinoma: lessons from Thailand. *Current opinion in*  
30  
31 504 *gastroenterology* 2008;24(3):349-56. doi: 10.1097/MOG.0b013e3282fbf9b3  
32  
33 505 29. Srivatanakul P, Sriplung H, Deerasamee S. Epidemiology of liver cancer: an overview.  
34  
35 506 *Asian Pacific journal of cancer prevention : APJCP* 2004;5(2):118-25.  
36  
37 507 30. Prakobwong S, Yongvanit P, Hiraku Y, et al. Involvement of MMP-9 in peribiliary  
38  
39 508 fibrosis and cholangiocarcinogenesis via Rac1-dependent DNA damage in a hamster  
40  
41 509 model. *International journal of cancer Journal international du cancer*  
42  
43 510 2010;127(11):2576-87. doi: 10.1002/ijc.25266  
44  
45 511 31. Bachar GN, Cohen M, Belenky A, et al. Effect of aging on the adult extrahepatic bile  
46  
47 512 duct: a sonographic study. *Journal of ultrasound in medicine : official journal of the*  
48  
49 513 *American Institute of Ultrasound in Medicine* 2003;22(9):879-82; quiz 83-5.  
50  
51  
52  
53  
54  
55  
56  
57  
58  
59  
60

- 1  
2  
3 514 32. Landry D, Tang A, Murphy-Lavallee J, et al. Dilatation of the bile duct in patients after  
4  
5 515 cholecystectomy: a retrospective study. *Canadian Association of Radiologists journal =*  
6  
7 516 *Journal l'Association canadienne des radiologistes* 2014;65(1):29-34. doi:  
8  
9 517 10.1016/j.carj.2012.09.004  
10  
11 518 33. Barusrux S, Nanok C, Puthisawas W, et al. Viral hepatitis B, C infection and genotype  
12  
13 519 distribution among cholangiocarcinoma patients in northeast Thailand. *Asian Pacific*  
14  
15 520 *journal of cancer prevention : APJCP* 2012;13 Suppl:83-7.  
16  
17 521 34. Lee TY, Lee SS, Jung SW, et al. Hepatitis B virus infection and intrahepatic  
18  
19 522 cholangiocarcinoma in Korea: a case-control study. *The American journal of*  
20  
21 523 *gastroenterology* 2008;103(7):1716-20. doi: 10.1111/j.1572-0241.2008.01796.x  
22  
23 524 35. Li M, Li J, Li P, et al. Hepatitis B virus infection increases the risk of  
24  
25 525 cholangiocarcinoma: a meta-analysis and systematic review. *Journal of gastroenterology*  
26  
27 526 *and hepatology* 2012;27(10):1561-8. doi: 10.1111/j.1440-1746.2012.07207.x  
28  
29 527 36. Srivatanakul P, Honjo S, Kittiwatanachot P, et al. Hepatitis viruses and risk of  
30  
31 528 cholangiocarcinoma in northeast Thailand. *Asian Pacific journal of cancer prevention :*  
32  
33 529 *APJCP* 2010;11(4):985-8.  
34  
35 530 37. Zhou YM, Zhang XF, Wu LP, et al. Risk factors for combined hepatocellular-  
36  
37 531 cholangiocarcinoma: a hospital-based case-control study. *World journal of*  
38  
39 532 *gastroenterology : WJG* 2014;20(35):12615-20. doi: 10.3748/wjg.v20.i35.12615  
40  
41 533 38. Kamsa-Ard S, Luvira V, Pugkhem A, et al. Association between praziquantel treatment  
42  
43 534 and cholangiocarcinoma: a hospital-based matched case-control study. *BMC cancer*  
44  
45 535 2015;15:776. doi: 10.1186/s12885-015-1788-6  
46  
47 536 39. Liu ZY, Zhou YM, Shi LH, et al. Risk factors of intrahepatic cholangiocarcinoma in  
48  
49 537 patients with hepatolithiasis: a case-control study. *Hepatobiliary & pancreatic diseases*  
50  
51 538 *international : HBPD INT* 2011;10(6):626-31.  
52  
53  
54  
55  
56  
57  
58  
59  
60

- 1  
2  
3 539 40. Manwong M, Songserm N, Promthet S, et al. Risk factors for cholangiocarcinoma in the  
4  
5 540 lower part of Northeast Thailand: a hospital-based case-control study. *Asian Pacific*  
6  
7 541 *journal of cancer prevention* : *APJCP* 2013;14(10):5953-6.  
8  
9 542  
10  
11 543  
12  
13  
14  
15  
16  
17  
18  
19  
20  
21  
22  
23  
24  
25  
26  
27  
28  
29  
30  
31  
32  
33  
34  
35  
36  
37  
38  
39  
40  
41  
42  
43  
44  
45  
46  
47  
48  
49  
50  
51  
52  
53  
54  
55  
56  
57  
58  
59  
60

For peer review only

1  
2  
3 544 **Captions for the figures:**  
4

5 545

6  
7 546 **Figure 1** Percentage of BDD between male and female according to PDF1, 2, and 3.  
8

9 547

10  
11 548 **Figure 2** Number of BDD in PDF subjects by age range.  
12

13 549

14  
15 550 **Figure 3** The adjusted OR and crude OR of the associated factors of BDD.  
16

17 551  
18  
19

20 **Table 1** Baseline demographic and clinical characteristics of subjects  
21

| Characteristics            | Number (n=394 026) | Percentage |
|----------------------------|--------------------|------------|
| Gender                     |                    |            |
| Female                     | 242 115            | 61.4       |
| Male                       | 151 866            | 38.6       |
| Missing data (n=45)        |                    |            |
| Age group (years)          |                    |            |
| 40-44                      | 49 281             | 12.9       |
| 45-49                      | 71 564             | 18.7       |
| 50-54                      | 78 428             | 20.5       |
| 55-59                      | 69 530             | 18.2       |
| 60 years and over          | 114 305            | 29.8       |
| Mean±Standard deviation    | 54.92±9.03         |            |
| Median (minimum : maximum) | 54 (40 : 100)      |            |
| Missing data (n=10 918)    |                    |            |
| Education levels           |                    |            |
| None                       | 6561               | 1.7        |
| Primary                    | 286 840            | 72.9       |

**Table 1** Baseline demographic and clinical characteristics of subjects

| Characteristics                       | Number (n=394 026) | Percentage |
|---------------------------------------|--------------------|------------|
| Secondary                             | 78 090             | 19.9       |
| Certificate/Bachelor                  | 18 632             | 4.7        |
| Higher than bachelor                  | 3055               | 0.8        |
| Missing data (n=848)                  |                    |            |
| Occupation                            |                    |            |
| Unemployed                            | 15 582             | 4.0        |
| Farmer                                | 306 421            | 77.9       |
| Labor                                 | 32 420             | 8.2        |
| Own business                          | 13 467             | 3.4        |
| Government official/State enterprises | 13 997             | 3.6        |
| Others                                | 11 335             | 2.9        |
| Missing data (n=804)                  |                    |            |
| Relatives diagnosed with CCA          |                    |            |
| No                                    | 319 902            | 81.4       |
| Yes                                   | 73 286             | 18.6       |
| Missing data (n=838)                  |                    |            |
| Liver fluke infection                 |                    |            |
| No                                    | 113 178            | 62.1       |
| Yes                                   | 68 979             | 37.9       |
| Missing data (n=211 869)              |                    |            |
| Praziquantel treatment                |                    |            |
| None                                  | 270 183            | 70.3       |
| One time                              | 84 136             | 21.9       |
| Two times                             | 18 126             | 4.7        |
| Three times                           | 5264               | 1.4        |

**Table 1** Baseline demographic and clinical characteristics of subjects

| Characteristics             | Number (n=394 026) | Percentage |
|-----------------------------|--------------------|------------|
| More than three times       | 6414               | 1.7        |
| Missing data (n=9903)       |                    |            |
| Smoking history             |                    |            |
| No                          | 308 776            | 78.7       |
| Yes, current or previous    | 83 754             | 21.3       |
| Missing data (n=1496)       |                    |            |
| Alcohol consumption history |                    |            |
| No                          | 214 495            | 54.6       |
| Yes, current or previous    | 178 564            | 45.4       |
| Missing data (n=967)        |                    |            |
| Hepatitis B                 |                    |            |
| No                          | 382 058            | 98.2       |
| Yes                         | 6803               | 1.8        |
| Missing data (n=5165)       |                    |            |
| Hepatitis C                 |                    |            |
| No                          | 388 114            | 99.8       |
| Yes                         | 747                | 0.2        |
| Missing data (n=5165)       |                    |            |
| Diabetes mellitus           |                    |            |
| No                          | 362 296            | 93.2       |
| Yes                         | 26 565             | 6.8        |
| Missing data (n=5165)       |                    |            |
| Periductal fibrosis         |                    |            |
| None                        | 324 482            | 82.4       |
| PDF1                        | 48 383             | 12.3       |

**Table 1** Baseline demographic and clinical characteristics of subjects

| Characteristics | Number (n=394 026) | Percentage |
|-----------------|--------------------|------------|
| PDF2            | 18 686             | 4.7        |
| PDF3            | 2475               | 0.6        |

552

**Table 2** Prevalence, and crude and adjusted odd ratios of BDD associated factors and their 95% confidence interval

| Factors              | Subjects | % BDD | Crude OR | Adjusted OR | 95% CI       | P value |
|----------------------|----------|-------|----------|-------------|--------------|---------|
| Over all             | 394 026  | 1.2   | N/A      | N/A         | N/A          | N/A     |
| Periductal fibrosis  |          |       |          |             |              | <0.001  |
| None                 | 324 482  | 1.1   | 1        | 1           |              |         |
| PDF1                 | 48 383   | 1.4   | 1.23     | 1.25        | 1.11 to 1.40 |         |
| PDF2                 | 18 686   | 1.7   | 1.55     | 1.24        | 1.04 to 1.47 |         |
| PDF3                 | 2475     | 6.6   | 6.35     | 5.74        | 4.57 to 7.21 |         |
| Gender               |          |       |          |             |              | <0.001  |
| Female               | 242 115  | 0.9   | 1        | 1           |              |         |
| Male                 | 151 866  | 1.7   | 2.00     | 1.46        | 1.31 to 1.63 |         |
| Age group (years)    |          |       |          |             |              | <0.001  |
| 40-44                | 49 281   | 0.6   | 1        | 1           |              |         |
| 45-49                | 71 564   | 0.6   | 1.04     | 1.10        | 0.88 to 1.38 |         |
| 50-54                | 78 428   | 0.9   | 1.44     | 1.42        | 1.15 to 1.75 |         |
| 55-59                | 69 530   | 1.1   | 1.77     | 1.74        | 1.42 to 2.14 |         |
| 60 years and over    | 114 305  | 2.1   | 3.46     | 3.14        | 2.59 to 3.81 |         |
| Education levels     |          |       |          |             |              | 0.472   |
| None                 | 6561     | 1.6   | 1        | 1           |              |         |
| Primary              | 286 840  | 1.3   | 0.82     | 0.91        | 0.65 to 1.27 |         |
| Secondary            | 78 090   | 0.8   | 0.53     | 0.72        | 0.51 to 1.03 |         |
| Certificate/Bachelor | 18 632   | 1.1   | 0.71     | 0.81        | 0.53 to 1.24 |         |
| Higher than bachelor | 3055     | 1.5   | 0.98     | 0.94        | 0.52 to 1.71 |         |

**Table 2** Prevalence, and crude and adjusted odd ratios of BDD associated factors and their 95% confidence interval

| Factors                      | Subjects | % BDD | Crude OR | Adjusted OR | 95% CI       | P value |
|------------------------------|----------|-------|----------|-------------|--------------|---------|
| Occupations                  |          |       |          |             |              | <0.001  |
| Unemployed                   | 15 582   | 2.5   | 1        | 1           |              |         |
| Farmer                       | 306 421  | 1.1   | 0.45     | 0.47        | 0.40 to 0.55 |         |
| Labor                        | 32 420   | 1.0   | 0.39     | 0.53        | 0.41 to 0.67 |         |
| Own business                 | 13 467   | 1.0   | 0.40     | 0.65        | 0.48 to 0.87 |         |
| Government/State enterprises | 13 997   | 1.5   | 0.59     | 0.87        | 0.63 to 1.20 |         |
| Others                       | 11 335   | 1.4   | 0.57     | 0.60        | 0.44 to 0.80 |         |
| Relatives diagnosed with CCA |          |       |          |             |              | 0.018   |
| No                           | 319 902  | 1.2   | 1        | 1           |              |         |
| Yes                          | 73 286   | 1.2   | 0.99     | 1.12        | 1.02 to 1.24 |         |
| Liver fluke infection        |          |       |          |             |              | <0.001  |
| No                           | 113 178  | 1.2   | 1        | 1           |              |         |
| Yes                          | 68 979   | 1.5   | 1.24     | 1.25        | 1.12 to 1.39 |         |
| Praziquantel treatment       |          |       |          |             |              | 0.067   |
| None                         | 270 183  | 1.1   | 1        | 1           |              |         |
| One time                     | 84 136   | 1.3   | 1.20     | 0.85        | 0.75 to 0.95 |         |
| Two times                    | 18 126   | 1.5   | 1.33     | 0.93        | 0.79 to 1.10 |         |
| Three times                  | 5264     | 1.7   | 1.56     | 1.10        | 0.85 to 1.43 |         |
| More than three times        | 6414     | 1.8   | 1.63     | 1.26        | 1.00 to 1.59 |         |
| Smoking history              |          |       |          |             |              | <0.001  |
| No                           | 308 776  | 1.0   | 1        | 1           |              |         |
| Yes, current or previous     | 83 754   | 2.0   | 2.11     | 1.31        | 1.17 to 1.46 |         |
| Alcohol consumption history  |          |       |          |             |              | 0.002   |
| No                           | 214 495  | 1.0   | 1        | 1           |              |         |
| Yes, current or previous     | 178 564  | 1.4   | 1.45     | 1.17        | 1.06 to 1.29 |         |
| Hepatitis B virus            |          |       |          |             |              | 0.298   |



**Table 2** Prevalence, and crude and adjusted odd ratios of BDD associated factors and their 95% confidence interval

| Factors           | Subjects | % BDD | Crude OR | Adjusted OR | 95% CI       | P value |
|-------------------|----------|-------|----------|-------------|--------------|---------|
| No                | 382 058  | 1.2   | 1        | 1           |              |         |
| Yes               | 6803     | 1.4   | 1.13     | 1.16        | 0.88 to 1.52 |         |
| Hepatitis C virus |          |       |          |             |              | 0.124   |
| No                | 388 114  | 1.2   | 1        | 1           |              |         |
| Yes               | 747      | 2.0   | 1.69     | 1.69        | 0.87 to 3.31 |         |
| Diabetes mellitus |          |       |          |             |              | 0.011   |
| No                | 362 296  | 1.2   | 1        | 1           |              |         |
| Yes               | 26 565   | 1.6   | 1.37     | 1.20        | 1.04 to 1.37 |         |

553 N/A, Not applicable.

554

1  
2  
3  
4  
5  
6  
7  
8  
9  
10  
11  
12  
13  
14  
15  
16  
17  
18  
19  
20  
21  
22  
23  
24  
25  
26  
27  
28  
29  
30  
31  
32  
33  
34  
35  
36  
37  
38  
39  
40  
41  
42  
43  
44  
45  
46  
47  
48  
49  
50  
51  
52  
53  
54  
55  
56  
57  
58  
59  
60

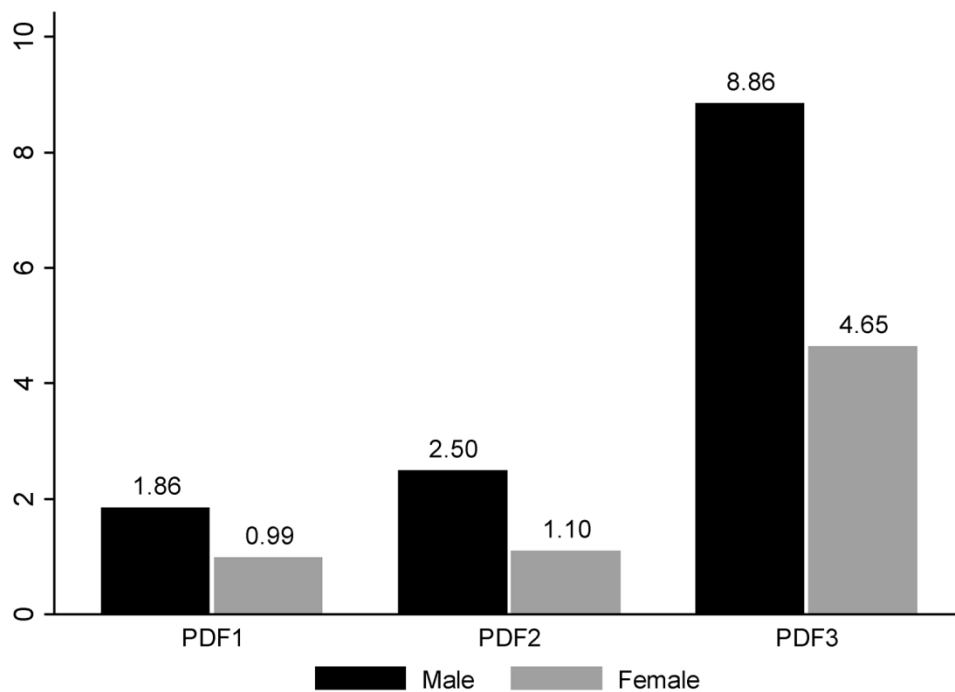

Figure 1 Percentage of BDD between male and female according to PDF1, 2, and 3.

143x104mm (300 x 300 DPI)

1  
2  
3  
4  
5  
6  
7  
8  
9  
10  
11  
12  
13  
14  
15  
16  
17  
18  
19  
20  
21  
22  
23  
24  
25  
26  
27  
28  
29  
30  
31  
32  
33  
34  
35  
36  
37  
38  
39  
40  
41  
42  
43  
44  
45  
46  
47  
48  
49  
50  
51  
52  
53  
54  
55  
56  
57  
58  
59  
60

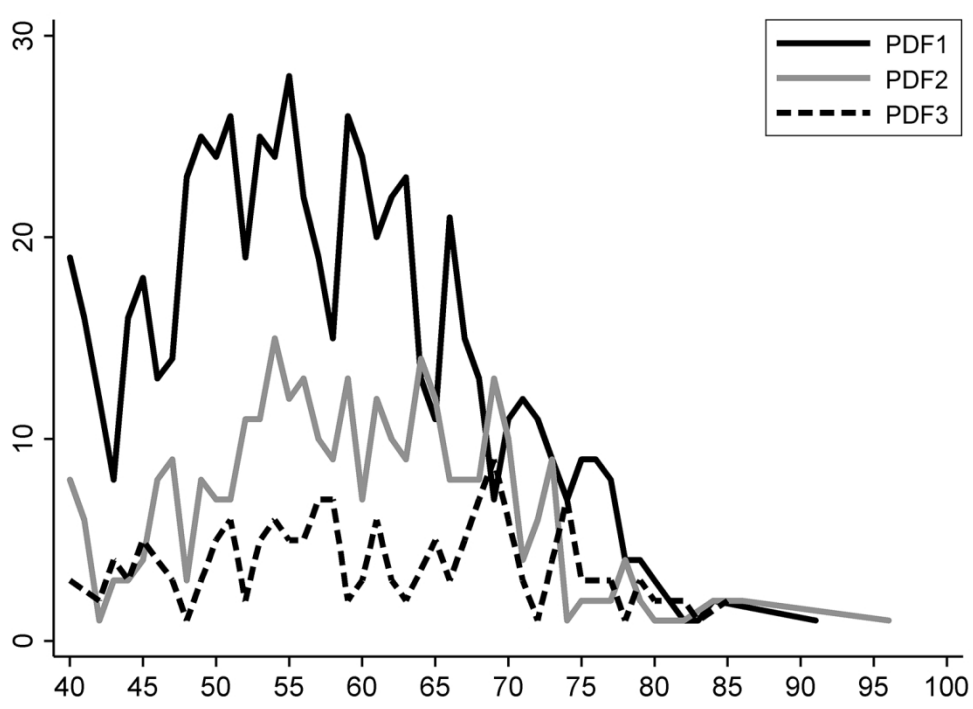

Figure 2 Number of BDD in PDF subjects by age range.

141x103mm (300 x 300 DPI)



Figure 3 The adjusted OR and crude OR of the associated factors of BDD.

154x215mm (300 x 300 DPI)

## STROBE Statement—checklist of items that should be included in reports of observational studies

|                              | Item No                                                                                                      | Location | Recommendation                                                                                                                                                                             |                                                                                                    |
|------------------------------|--------------------------------------------------------------------------------------------------------------|----------|--------------------------------------------------------------------------------------------------------------------------------------------------------------------------------------------|----------------------------------------------------------------------------------------------------|
| Title and abstract           | 1                                                                                                            | Pg3      | (a) Indicate the study's design with a commonly used term in the title or the abstract                                                                                                     |                                                                                                    |
|                              |                                                                                                              | Pg3      | (b) Provide in the abstract an informative and balanced summary of what was done and what was found                                                                                        |                                                                                                    |
| <b>Introduction</b>          |                                                                                                              |          |                                                                                                                                                                                            |                                                                                                    |
| Background/rationale         | 2                                                                                                            | Pgs5-6   | Explain the scientific background and rationale for the investigation being reported                                                                                                       |                                                                                                    |
| Objectives                   | 3                                                                                                            | Pg6      | State specific objectives, including any prespecified hypotheses                                                                                                                           |                                                                                                    |
| <b>Methods</b>               |                                                                                                              |          |                                                                                                                                                                                            |                                                                                                    |
| Study design                 | 4                                                                                                            | Pgs 6-7  | Present key elements of study design early in the paper                                                                                                                                    |                                                                                                    |
| Setting                      | 5                                                                                                            | Pgs 6-7  | Describe the setting, locations, and relevant dates, including periods of recruitment, exposure, follow-up, and data collection                                                            |                                                                                                    |
| Participants                 | 6                                                                                                            | Pgs6-7   | (a) <i>Cohort study</i> —Give the eligibility criteria, and the sources and methods of selection of participants. Describe methods of follow-up                                            |                                                                                                    |
|                              |                                                                                                              |          | <i>Case-control study</i> —Give the eligibility criteria, and the sources and methods of case ascertainment and control selection. Give the rationale for the choice of cases and controls |                                                                                                    |
|                              |                                                                                                              |          | <i>Cross-sectional study</i> —Give the eligibility criteria, and the sources and methods of selection of participants                                                                      |                                                                                                    |
| Variables                    | 7                                                                                                            | Pg8      | (b) <i>Cohort study</i> —For matched studies, give matching criteria and number of exposed and unexposed                                                                                   |                                                                                                    |
|                              |                                                                                                              |          | <i>Case-control study</i> —For matched studies, give matching criteria and the number of controls per case                                                                                 |                                                                                                    |
|                              |                                                                                                              |          | Clearly define all outcomes, exposures, predictors, potential confounders, and effect modifiers. Give diagnostic criteria, if applicable                                                   |                                                                                                    |
| Data sources/<br>measurement | 8*                                                                                                           | Pgs7-8   | For each variable of interest, give sources of data and details of methods of assessment (measurement). Describe comparability of assessment methods if there is more than one group       |                                                                                                    |
| Bias                         | 9                                                                                                            | Pg4      | Describe any efforts to address potential sources of bias                                                                                                                                  |                                                                                                    |
| Study size                   | 10                                                                                                           | Pg6-7    | Explain how the study size was arrived at                                                                                                                                                  |                                                                                                    |
| Quantitative variables       | 11                                                                                                           | Pg8-9    | Explain how quantitative variables were handled in the analyses. If applicable, describe which groupings were chosen and why                                                               |                                                                                                    |
| Statistical methods          | 12                                                                                                           | Pg8-9    | (a) Describe all statistical methods, including those used to control for confounding                                                                                                      |                                                                                                    |
|                              |                                                                                                              |          | N/A                                                                                                                                                                                        | (b) Describe any methods used to examine subgroups and interactions                                |
|                              |                                                                                                              |          | Pg9                                                                                                                                                                                        | (c) Explain how missing data were addressed                                                        |
|                              |                                                                                                              |          | N/A                                                                                                                                                                                        | (d) <i>Cohort study</i> —If applicable, explain how loss to follow-up was addressed                |
|                              |                                                                                                              |          |                                                                                                                                                                                            | <i>Case-control study</i> —If applicable, explain how matching of cases and controls was addressed |
| N/A                          | <i>Cross-sectional study</i> —If applicable, describe analytical methods taking account of sampling strategy |          |                                                                                                                                                                                            |                                                                                                    |
|                              | (e) Describe any sensitivity analyses                                                                        |          |                                                                                                                                                                                            |                                                                                                    |

Continued on next page

For peer review only

1  
2  
3  
4  
5  
6  
7  
8  
9  
10  
11  
12  
13  
14  
15  
16  
17  
18  
19  
20  
21  
22  
23  
24  
25  
26  
27  
28  
29  
30  
31  
32  
33  
34  
35  
36  
37  
38  
39  
40  
41  
42  
43  
44  
45  
46  
47  
48  
49  
50  
51  
52  
53  
54  
55  
56  
57  
58  
59  
60

| Location         |     | Results                  |                                                                                                                                                                                                              |
|------------------|-----|--------------------------|--------------------------------------------------------------------------------------------------------------------------------------------------------------------------------------------------------------|
| Participants     | 13* | Pg9                      | (a) Report numbers of individuals at each stage of study—eg numbers potentially eligible, examined for eligibility, confirmed eligible, included in the study, completing follow-up, and analysed            |
|                  |     | N/A                      | (b) Give reasons for non-participation at each stage                                                                                                                                                         |
|                  |     | N/A                      | (c) Consider use of a flow diagram                                                                                                                                                                           |
| Descriptive data | 14* | Pg9                      | (a) Give characteristics of study participants (eg demographic, clinical, social) and information on exposures and potential confounders                                                                     |
|                  |     | Pgs22-24                 | (b) Indicate number of participants with missing data for each variable of interest                                                                                                                          |
|                  |     | N/A                      | (c) <i>Cohort study</i> —Summarise follow-up time (eg, average and total amount)                                                                                                                             |
| Outcome data     | 15* | Pgs9-10                  | <i>Cohort study</i> —Report numbers of outcome events or summary measures over time                                                                                                                          |
|                  |     | N/A                      | <i>Case-control study</i> —Report numbers in each exposure category, or summary measures of exposure                                                                                                         |
|                  |     | Pg25                     | <i>Cross-sectional study</i> —Report numbers of outcome events or summary measures                                                                                                                           |
| Main results     | 16  | Pgs9-10                  | (a) Give unadjusted estimates and, if applicable, confounder-adjusted estimates and their precision (eg, 95% confidence interval). Make clear which confounders were adjusted for and why they were included |
|                  |     | N/a                      | (b) Report category boundaries when continuous variables were categorized                                                                                                                                    |
|                  |     | N/a                      | (c) If relevant, consider translating estimates of relative risk into absolute risk for a meaningful time period                                                                                             |
| Other analyses   | 17  | N/A                      | Report other analyses done—eg analyses of subgroups and interactions, and sensitivity analyses                                                                                                               |
|                  |     | <b>Discussion</b>        |                                                                                                                                                                                                              |
| Key results      | 18  | Pg11-12                  | Summarise key results with reference to study objectives                                                                                                                                                     |
| Limitations      | 19  | Pg4                      | Discuss limitations of the study, taking into account sources of potential bias or imprecision. Discuss both direction and magnitude of any potential bias                                                   |
| Interpretation   | 20  | Pg14                     | Give a cautious overall interpretation of results considering objectives, limitations, multiplicity of analyses, results from similar studies, and other relevant evidence                                   |
| Generalisability | 21  | Pg14                     | Discuss the generalisability (external validity) of the study results                                                                                                                                        |
|                  |     | <b>Other information</b> |                                                                                                                                                                                                              |
| Funding          | 22  | Pg15                     | Give the source of funding and the role of the funders for the present study and, if applicable, for the original study on which the present article is based                                                |

\*Give information separately for cases and controls in case-control studies and, if applicable, for exposed and unexposed groups in cohort and cross-sectional studies.

**Note:** An Explanation and Elaboration article discusses each checklist item and gives methodological background and published examples of transparent reporting. The STROBE checklist is best used in conjunction with this article (freely available on the Web sites of PLoS Medicine at <http://www.plosmedicine.org/>, Annals of Internal Medicine at <http://www.annals.org/>, and Epidemiology at <http://www.epidem.com/>). Information on the STROBE Initiative is available at [www.strobe-statement.org](http://www.strobe-statement.org).

# BMJ Open

## Association between periductal fibrosis and bile duct dilatation among a population at high-risk of cholangiocarcinoma: a cross-sectional study of cholangiocarcinoma screening in Northeast Thailand

|                                 |                                                                                                                                                                                                                                                                                                                                                                                                                                                                                                                                                                    |
|---------------------------------|--------------------------------------------------------------------------------------------------------------------------------------------------------------------------------------------------------------------------------------------------------------------------------------------------------------------------------------------------------------------------------------------------------------------------------------------------------------------------------------------------------------------------------------------------------------------|
| Journal:                        | <i>BMJ Open</i>                                                                                                                                                                                                                                                                                                                                                                                                                                                                                                                                                    |
| Manuscript ID                   | bmjopen-2018-023217.R2                                                                                                                                                                                                                                                                                                                                                                                                                                                                                                                                             |
| Article Type:                   | Research                                                                                                                                                                                                                                                                                                                                                                                                                                                                                                                                                           |
| Date Submitted by the Author:   | 24-Jan-2019                                                                                                                                                                                                                                                                                                                                                                                                                                                                                                                                                        |
| Complete List of Authors:       | Chamadol, Nittaya; Khon Kaen University Faculty of Medicine Khuntikeo, Narong; Khon Kaen University Faculty of Medicine Thinkhamrop , Bandit; Faculty of Public Health, Khon Kaen University, Department of Biostatistics and Epidemiology Thinkhamrop, Kavin; Khon Kaen University Faculty of Public Health Suwannatrai, Apiporn; Khon Kaen University Faculty of Medicine Kelly, Matthew; The Australian National University, Research School of Population Health Promthet, Supanee; Faculty of Public Health, Khon Kaen University, Department of Epidemiology |
| <b>Primary Subject Heading</b>: | Public health                                                                                                                                                                                                                                                                                                                                                                                                                                                                                                                                                      |
| Secondary Subject Heading:      | Global health                                                                                                                                                                                                                                                                                                                                                                                                                                                                                                                                                      |
| Keywords:                       | bile duct dilatation, periductal fibrosis, ULTRASONOGRAPHY, cholangiocarcinoma, screening, Thailand                                                                                                                                                                                                                                                                                                                                                                                                                                                                |
|                                 |                                                                                                                                                                                                                                                                                                                                                                                                                                                                                                                                                                    |

SCHOLARONE™  
Manuscripts



1  
2  
3 **1 TITLE PAGE**  
4

5  
6 **2**

7  
8 **Title:** Association between periductal fibrosis and bile duct dilatation among a population at  
9  
10 high-risk of cholangiocarcinoma: a cross-sectional study cholangiocarcinoma screening in  
11  
12 Northeast Thailand  
13

14  
15 **6**

16  
17 **Authors:** Nittaya Chamadol,<sup>1,2,3</sup> Narong Khuntikeo,<sup>1,2,4</sup> Bandit Thinkhamrop,<sup>1,2,5,6</sup> Kavin  
18  
19 Thinkhamrop,<sup>1,2,6</sup> Apiporn T. Suwannatrai,<sup>1,2,7</sup> Matthew Kelly,<sup>8</sup> and Supanee Promthet<sup>1,5,9</sup>  
20

21  
22 **9**

23  
24 **Affiliations:**

25  
26 <sup>1</sup>Cholangiocarcinoma Screening and Care Program (CASCAP), Khon Kaen University, Khon  
27  
28 Kaen, Thailand.  
29

30  
31 <sup>2</sup>Cholangiocarcinoma Research Institute, Khon Kaen University, Khon Kaen, Thailand.  
32

33  
34 <sup>3</sup>Department of Radiology, Faculty of Medicine, Khon Kaen University, Khon Kaen,  
35  
36 Thailand.  
37

38  
39 <sup>4</sup>Department of Surgery, Faculty of Medicine, Khon Kaen University, Khon Kaen, Thailand.  
40

41  
42 <sup>5</sup>Epidemiology and Biostatistics Section, Faculty of Public Health, Khon Kaen University,  
43  
44 Khon Kaen, Thailand.  
45

46  
47 <sup>6</sup>Data Management and Statistical Analysis Center (DAMASAC), Faculty of Public Health,  
48  
49 Khon Kaen University, Khon Kaen, Thailand.  
50

51  
52 <sup>7</sup>Department of Parasitology, Faculty of Medicine, Khon Kaen University, Khon Kaen,  
53  
54 Thailand.  
55

56  
57 <sup>8</sup>Department of Global Health, Research School of Population Health, Australian National  
58  
59 University, Canberra, Australia.  
60

1  
2  
3 25 <sup>9</sup>ASEAN Cancer Epidemiology and Prevention Research Group, Khon Kaen University,  
4  
5 26 Khon Kaen, Thailand.  
6  
7  
8 27  
9

10 28 **Email address:**

11  
12 29 NC: Nittaya Chamadol (nittayachamadol@yahoo.com)

13  
14 30 NK: Narong Khuntikeo (nkhuntikeo@gmail.com)

15  
16 31 BT: Bandit Thinkhamrop (bandit@kku.ac.th)

17  
18 32 KT: Kavin Thinkhamrop (kvinth@gmail.com/ kavith@kku.ac.th)

19  
20 33 ATS: Apiporn T. Suwannatrai (apiporn@kku.ac.th)

21  
22 34 MK: Matthew Kelly (matthew.kelly@anu.edu.au)

23  
24 35 SP: Supanee Promthet (supanee@kku.ac.th)  
25  
26  
27  
28  
29 36

30  
31 37 **Corresponding authors:**

32  
33 38 Name: Kavin Thinkhamrop, Dr.P.H.

34  
35 39 Address: Data Management and Statistical Analysis Center, Faculty of Public Health,  
36  
37 Khon Kaen University, Thailand.  
38  
39

40 41 Telephone: +66-97 317 1976

41  
42 42 e-Mail: kvinth@gmail.com/ kavith@kku.ac.th  
43  
44  
45  
46

47 44 **Type of contribution:** Research article

48  
49 45 **Number of words in the abstract:** 298

50  
51 46 **Number of words in the text:** 3,086 (excluding references and tables)

52  
53 47 **Number of tables:** 2

54  
55 48 **Number of figures:** 3  
56  
57  
58  
59  
60

1  
2  
3 49 **ABSTRACT**

4  
5 50 **Objectives** To assess associations between periductal fibrosis (PDF) and bile duct dilatation  
6  
7 51 (BDD) in ultrasonography (US) screening of population at risk of cholangiocarcinoma (CCA)  
8  
9 52 due to residence in an endemic area for *Opisthorchis viverrini*. CCA survival rates are low  
10  
11 53 and early identification of risk factors is essential. BDD is one symptom which can identify  
12  
13 54 patients at risk of CCA. Detection of PDF by US can also identify at risk patients, at an  
14  
15 55 earlier stage of CCA development. Identification of association between PDF and BDD will  
16  
17 56 inform screening practices for CCA risk, by increasing the viability of PDF screening for  
18  
19 57 CCA risk.

20  
21  
22  
23 58 **Setting** Nine tertiary care hospitals in Northeast Thailand.

24  
25  
26 59 **Design** Cross-sectional study.

27  
28 60 **Participants** Study subjects in the Cholangiocarcinoma Screening and Care Program  
29  
30 61 (CASCAP) in Northeast Thailand. CASCAP inclusion criteria are all residents of Northeast  
31  
32 62 Thailand aged 40 years and over. Participants are recruited through CCA screening centers  
33  
34 63 and through primary health care units. So far 394 026 have been enrolled.

35  
36  
37 64 **Methods** PDF and BDD were identified through US. PDF was categorized into three groups,  
38  
39 65 PDF1, 2 and 3, depending on their high echo locality in the peripheral, segmental and main  
40  
41 66 bile duct, respectively. Associations between PDF and BDD were determined by adjusted  
42  
43 67 odds ratio (OR) and 95% confidence interval (CI) using multiple logistic regression.

44  
45  
46 68 **Results** BDD was found in 6.6% of PDF3, 1.7% of PDF2, and 1.4% of PDF1 cases. Among  
47  
48 69 PDF cases, especially in PDF3, BDD was found in male more than female (8.9% and 4.6%,  
49  
50 70 respectively). Compared to non-PDF, the association between PDF3 and BDD was highly  
51  
52 71 significant (adjusted OR=5.74, 95% CI 4.57 to 7.21, P<0.001).  
53  
54  
55  
56  
57  
58  
59  
60

1  
2  
3 72 **Conclusions** Our findings reveal that there is a relationship between PDF and BDD, which is  
4  
5 73 associated with CCA. Therefore, PDF can also be an indicator for suspected-CCA diagnosis  
6  
7 74 through US.  
8  
9

10 75

11  
12 76 **Keywords** bile duct dilatation; periductal fibrosis; ultrasonography; cholangiocarcinoma;  
13  
14 77 screening; Thailand  
15  
16

17 78

18  
19 79 **Article summary**

20  
21 80 **Strengths and limitations of the study**

- 22  
23  
24 81 • The large size of the study population and its geographic distribution across Northeast  
25  
26 82 Thailand are a significant strength.  
27  
28 83 • This is the first and largest screening program for cholangiocarcinoma (CCA) in an area  
29  
30 84 with the highest incidence in the world.  
31  
32 85 • CCA risk factors (PDF and BDD) were measured using ultrasonography by skilled  
33  
34 86 radiologists.  
35  
36 87 • Demographic, and some health, data were self-reported leading to potential bias in  
37  
38 88 measurement of liver fluke infection, praziquantel treatment, and pre-existing medical  
39  
40 89 conditions including hepatitis B (HB), hepatitis C (HC), and diabetes mellitus (DM).  
41  
42 90 • Self-report could lead to prevalence underestimates due to the fact that subjects may  
43  
44 91 not have been willing to disclose sensitive or personal information.  
45  
46  
47  
48  
49

50 92  
51  
52  
53  
54  
55  
56  
57  
58  
59  
60

## 94 INTRODUCTION

95 Cholangiocarcinoma (CCA) and hepatocellular carcinoma (HCC), are ranked the most  
96 prevalent cancers in Southeast Asia.<sup>1-3</sup> The early-stages of CCA can manifest through  
97 obstructive jaundice, which is found in 30% of patients who are diagnosed with primary  
98 sclerosing cholangitis.<sup>4</sup> Other liver disorders: fatty liver disease, cirrhosis, and liver mass are  
99 likewise recognized risk factors for both CCA and HCC.<sup>5-10</sup> Suspected CCA cases can also be  
100 identified through the presence of bile duct dilatation (BDD), which can be identified in  
101 suspected CCA cases through ultrasonography (US) screening.<sup>11 12</sup> A previous study  
102 demonstrated that US screening is highly sensitive in identifying CCA through confirmed  
103 incidences of BDD.<sup>13</sup> However, upon the detection and diagnosis of bile duct and liver  
104 disorders, it is often too late to save patients with CCA and HCC due to the rapid progression  
105 to advanced stages of hepatic carcinoma.<sup>14</sup> As well, detection of BDD by US requires the  
106 services of specialist radiologists, who are generally only available in major hospitals,  
107 limiting access to screening. Thus, the best way to save a patient's life and prevent the  
108 likelihood of cancer development is through early, easily accessible, screenings to detect the  
109 risk factors that may lead to cancer among high-risk populations.

110 As well as BDD there are several other indicators for CCA risk including well-accepted  
111 premalignant lesions such as biliary intraepithelial neoplasm (BillIN), and intraductal  
112 papillary neoplasm of the bile duct (IPNB).<sup>15 16</sup> Periductal fibrosis (PDF) is another  
113 abnormality of the bile duct which has been used to identify people at risk of developing  
114 CCA. This hepatobiliary abnormality is particularly prominent among people infected with  
115 the liver fluke, *Opisthorchis viverrini*.<sup>17-21</sup> This infection is caused by the consumption of raw  
116 or lightly fermented fish products and is one of the key risk factors for development of CCA  
117 in the region. PDF is caused by the thickening of the bile duct wall, along the periportal  
118 space.<sup>22</sup>

1  
2  
3 119 The relationship between PDF and CCA is indicated by the regular detection of PDF in  
4  
5 120 confirmed CCA cases, and this has been particularly common in Northeast Thailand where  
6  
7  
8 121 *O. viverrini* is endemic and a leading potential cause of CCA.<sup>8</sup> As a result of this relationship,  
9  
10 122 US detection has been utilized to identify people with PDF as a risk group for CCA  
11  
12 123 development.<sup>8 20 23 24</sup> Hepatobiliary abnormalities identified through ultrasound have been  
13  
14 124 shown in other studies to correlate well with histopathological confirmation making US a  
15  
16 125 valuable tool in early identification of these health issues.<sup>8</sup> Importantly, PDF can be identified  
17  
18 126 through US, but does not require the services of a specialist radiologist increasing the  
19  
20 127 potential access to screening, and PDF can be detected earlier than BDD allowing more  
21  
22 128 effective intervention.

23  
24  
25  
26 129 The potential to detect the risk of CCA earlier and without the need for specialist  
27  
28 130 radiologists, through the identification of PDF may be an important breakthrough in reducing  
29  
30 131 CCA incidence. So, both PDF and BDD have been recognized as indicators of CCA<sup>8 17</sup>, but  
31  
32 132 their relationship to one another has yet to be established or even studied in depth.  
33  
34 133 Determining their relationship, such as learning if one precedes the other may make a  
35  
36 134 significant change in how we screen for CCA via US. Therefore, this study seeks to  
37  
38 135 determine if there is an association between PDF and BDD among people at a high-risk CCA  
39  
40 136 population in Northeast Thailand. The results of this work will clarify necessary directions  
41  
42 137 toward early screening methodologies and appropriate cancer treatment.  
43  
44  
45  
46

47 138

## 49 139 **METHODS**

### 51 140 **Study design**

52  
53 141 This study presents data collected from the Cholangiocarcinoma Screening and Care Program  
54  
55 142 (CASCAP) in Northeast Thailand. CASCAP is a prospective cohort study that is considered  
56  
57 143 the first project for CCA screening in a high-risk population with a community-based bottom-  
58  
59  
60

1  
2  
3 144 up approach.<sup>25</sup> Although this overall project is a prospective cohort study, the results  
4  
5 145 presented here use cross sectional data from the baseline study carried out with participants.  
6  
7  
8 146  
9  
10 147 The overall aim of the study is to recruit all adults aged 40 years or over who reside in  
11  
12 148 Northeast Thailand and to screen them for cholangiocarcinoma and its risk factors in terms of  
13  
14 149 hepatobiliary abnormalities and infection with the liver fluke *Opisthorchis viverrini*. As such  
15  
16  
17 150 there are no strict inclusion or exclusion criteria apart from age group and place of residence.  
18  
19 151 Once consent has been obtained, the participants will be enrolled in the program. The  
20  
21 152 primary place of recruitment for this cohort study were 9 tertiary care hospitals in the  
22  
23 153 Northeast of Thailand. These hospitals serve as the main source of affordable tertiary care for  
24  
25  
26 154 local people in the region. Subjects were recruited at these hospitals in two ways. Firstly the  
27  
28 155 screening group comprised individuals who had attended the hospital for other reasons and  
29  
30  
31 156 were invited to receive ultrasound screening without evidencing any symptoms. The second  
32  
33 157 group, the walk-in group, were individuals who were attending the hospital because of CCA  
34  
35 158 symptoms and this group can then receive treatment. All participants were asked to join the  
36  
37 159 project by signing a consent form. All CCA patients were diagnosed and treated according to  
38  
39 160 routine, real world clinical practice by participating hospitals. Patients were followed-up and  
40  
41 161 provided with either clinical or palliative care depending on the stage of their disease.  
42  
43  
44 162 Treatment outcomes were recorded. Follow-up took place every 3-6 months depending on the  
45  
46  
47 163 patient's condition and unless scheduled otherwise.  
48

164

### 165 **Study population**

166 Our study recruited subjects from among people who participated the CASCAP project.  
167 These subjects form two groups (screening and walk-in). The screening group was people  
168 who have undergone routine US and who showed no symptoms that could be related to CCA.

1  
2  
3 169 The walk-in group was people who come to the hospital with symptoms indicating CCA  
4  
5  
6 170 which has been diagnosed with US. The subjects included in our study only those enrolled in  
7  
8 171 the CASCAP database from 2013-2017 with a total of 394 026 subjects.  
9

10  
11 172

### 14 173 **Patient and Public Involvement**

16 174 The CASCAP project is a comprehensive screening and treatment program for CCA.  
17  
18 175 Members of the public were first involved in the research in two ways. Firstly when members  
19  
20 176 of the public attended a participating hospital for any reason, hospital staff would actively  
21  
22 177 recruit them to the study. Village health volunteers also recruited participants while carrying  
23  
24 178 out their work. A second group were those who already has some suspected symptoms and  
25  
26 179 attended a hospital for screening at which point they were recruited into the study. The study  
27  
28 180 participants were not directly involved in the design of the study. Participants will be  
29  
30 181 contacted at least annually to be screened for CCA risk. Patients identified as having CCA  
31  
32 182 will receive standard care for the condition through the project. For the screening procedures  
33  
34 183 covered by this report participants are informed of the purpose, outcomes and implications of  
35  
36 184 these procedures.  
37  
38  
39  
40  
41  
42  
43

### 44 186 **Main outcome and independent variables**

46 187 The primary outcome for this study was BDD which was categorized into two groups  
47  
48 188 (no/yes). The independent variable of interest was PDF. We classify PDF into 3 categories  
49  
50 189 (PDF1, 2 and 3) using a World Health Organization standard methodology originally  
51  
52 190 developed for use in the assessment of schistosomal periportal fibrosis (PPF) but which is  
53  
54 191 also valid for the study of PDF given that PPF and PDF have the same ultrasound images of  
55  
56 192 Increased Periportal Echo.<sup>26</sup> We only use 3 of the 5 classifications utilized in this  
57  
58 193 methodology since anatomically extra and intra hepatic bile ducts run in parallel to the portal  
59  
60



1  
2  
3 194 vein in the periportal space, so the pathology of the bile duct should be detected first in the  
4  
5 195 periportal space. This identification system has been validated by comparing US diagnoses  
6  
7 196 with histopathologically proven cases of PDF with good agreement between the methods.<sup>8</sup>  
8  
9  
10 197 Using this system PDF is categorized based on the anatomical location of the intrahepatic and  
11  
12 198 extrahepatic bile duct. PDF1 is defined as having a high echo in the wall of small bile ducts  
13  
14 199 scattered in the liver as a starry sky pattern, PDF2 is a high echo along the segmental bile  
15  
16 200 duct wall running parallel with the portal vein, and PDF3 is a high echo along the main bile  
17  
18 201 duct wall running parallel with the portal vein in the periportal space.<sup>19</sup>  
19  
20  
21 202 Both BDD and PDF diagnosed via US by radiologists from the CASCAP project all of whom  
22  
23 203 took part in a special training course for ultrasound examination including all criteria to  
24  
25 204 diagnose hepatobiliary abnormalities. A teleconsultation system was also set up to confirm  
26  
27 205 diagnoses from radiologists. Demographic characteristics of PDF and non-PDF subjects were  
28  
29 206 the independent variables includes gender, age, education levels, occupations, having a  
30  
31 207 relative diagnosed with CCA, liver fluke infection, praziquantel (PZQ) treatments, smoking  
32  
33 208 (current or previous), alcohol consumption (current or previous) and diagnosis with hepatitis  
34  
35 209 B (HB), hepatitis C (HC), and diabetes mellitus (DM). All demographic characteristics listed  
36  
37 210 above were collected via face-to-face interview by interviewer from the CASCAP using  
38  
39 211 questionnaire.  
40  
41  
42  
43  
44  
45  
46

### 213 **Statistical analysis**

47  
48  
49 214 The demographic characteristics that were categorical data were summarized using  
50  
51 215 frequencies and percentages (i.e. gender, age groups, education levels, occupations, having a  
52  
53 216 relative diagnosed with CCA, liver fluke infection, PZQ treatments, smoking history, alcohol  
54  
55 217 consumption history and diagnosis with HB, HC, DM, and PDFs). The continuous data, such  
56  
57  
58  
59  
60

1  
2  
3 218 as the age of the subjects, were summarized by their mean, standard deviation, median,  
4  
5 219 minimum and maximum range.

6  
7 220 The prevalence of BDD was calculated and the percentage of the prevalence was  
8  
9 221 computed based on a normal approximation to a binomial distribution. Bivariate analysis  
10  
11 222 using simple logistic regression was performed to investigate the association between the  
12  
13 223 independent factors listed above and BDD. They were determined by crude odds ratio (OR)  
14  
15 224 and their 95% confidence intervals (CI). Then multivariable analysis using multiple logistic  
16  
17 225 regression was carried out to investigate the association between PDF and BDD as  
18  
19 226 determined by the adjusted OR and 95% CI. The final multivariate model was adjusted for all  
20  
21 227 factors which previous studies have reported to be associated with the hepatobiliary disease:  
22  
23 228 PDF, gender, age, education levels, occupations, having a relative diagnosed with CCA, liver  
24  
25 229 fluke infection, PZQ treatments, smoking, alcohol consumption as well as diagnosis with HB,  
26  
27 230 HC, and DM.

28  
29 231 There were missing values for some variables due to unwillingness of some participants  
30  
31 232 to answer some socio-demographic or health history questions or from errors in data  
32  
33 233 collection. Missing values for most variables were rare with proportions missing less than 3%  
34  
35 234 of participants. The only variable with a significant proportion of missing values was that of  
36  
37 235 previous liver fluke diagnosis (n=211 869), but this number includes those who had reported  
38  
39 236 never having been tested for infection.

40  
41 237 All test statistics were two-tailed and a p-value of less than 0.05 was considered  
42  
43 238 statistically significant. All analyses were performed by using a statistical package, Stata  
44  
45 239 version 15 (StataCorp, College Station, Texas, USA).

46  
47 240

## 48 241 **RESULTS**

### 49 242 **Descriptive summary**

1  
2  
3 243 The demographic characteristics of subjects were presented as numbers and percentages. A  
4  
5 244 total of 394 026 subjects who underwent US screenings for CCA were enrolled in our study.  
6  
7  
8 245 The subjects were all between the ages of 40-100 years old and reported a mean age of  
9  
10 246 54.92±9.03 years old. Of these, approximately two-thirds were female (61.4%) and the  
11  
12 247 majority of them completed primary school education level (72.9%) and worked as farmers  
13  
14 248 (77.9%). About one-third (29.7%) had ever used PZQ treatment, and about one-fourth  
15  
16 249 (21.3%) reported being a smoker or ex-smoker. The data of PDF diagnosis, 17.6% have  
17  
18 250 positive diagnosed and the highest percentage was in subjects diagnosed with PDF1 (12.3%)  
19  
20 251 while only 0.6% for PDF3 (table 1).  
21  
22  
23

24 252  
25  
26 253 <Table 1 located here>  
27  
28 254  
29

### 30 255 **Prevalence of BDD**

31  
32 256 From this study, the overall prevalence of BDD was reported to be 1.2%. The highest  
33  
34 257 prevalence of BDD was 6.6% from the PDF3 group under periductal fibrosis. PDF1 and  
35  
36 258 PDF2 subjects reported a low prevalence rate of only 1.4% and 1.7%, respectively (table 2).  
37  
38 259 Our study found that the prevalence of BDD occurring in PDF subjects was high in male  
39  
40 260 more than female, particularly in PDF3 (8.9% and 4.6%, respectively) (figure 1). Meanwhile,  
41  
42 261 we also found the number of BDD in PDF1 subjects was highest among people aged 55 years  
43  
44 262 old (figure 2).  
45  
46  
47  
48  
49

### 50 263 51 264 **Associations with BDD**

#### 52 265 **Bivariate analysis**

53  
54 266 The crude analysis using simple logistic regression found the variable with the strongest  
55  
56 267 association to BDD to be PDF3 compared to non-PDF (OR=6.35, 95% CI 5.40 to 7.46,  
57  
58  
59  
60

1  
2  
3 268 P<0.001). Other factors that were significantly associated with BDD included: gender, with  
4  
5 269 male being more affected by BDD than female; age, with a progressively increasing OR;  
6  
7 270 lower education levels; occupations that was unemployed; infected liver fluke; PZQ used,  
8  
9  
10 271 with a progressively increasing OR; having a history of smoking and alcohol consumption;  
11  
12 272 being positive for DM diagnosis (table 2).  
13  
14

15 273

### 17 274 **Multivariable analysis**

18  
19 275 Through the multivariable analysis using multiple logistic regression, all factors were  
20  
21 276 adjusted and the association of PDF3 subjects having BDD remained significantly high  
22  
23 277 compared with non-PDF subjects (adjusted OR=5.74, 95% CI 4.57 to 7.21, P<0.001) (table  
24  
25 278 2). Compared to crude OR, the adjusted OR of gender, age, occupations, liver fluke infection,  
26  
27 279 smoking history and alcohol consumption history, and a positive diagnosis of DM remained  
28  
29 280 statistically significant, while a positive diagnosis of HB and HC remained non-significant  
30  
31 281 (figure 3). Our study also found that relatives diagnosed with CCA changed from non-  
32  
33 282 significant in bivariate analysis to significant in multivariable analysis, while education levels  
34  
35 283 and PZQ treatment changed from significant to non-significant.  
36  
37  
38  
39

40 284

42 285 <Table 2 located here>

44 286

47 287 <Figure 1 located here>

49 288

51 289 <Figure 2 located here>

53 290

56 291 <Figure 3 located here>

58 292

## 293 DISCUSSION

294 Liver cancer is one of the leading causes of death throughout the world.<sup>27</sup> CCA accounts for  
295 more than 60% of these liver cancer cases with Northeast Thailand reporting the highest  
296 incidence in the world.<sup>28 29</sup> PDF and BDD have been recognized as the key risk factors of  
297 CCA development.<sup>8 17 21</sup> Due to ambiguities in the relationship between PDF and BDD, our  
298 study investigated the prevalence of PDF and BDD in a high-risk CCA population to find if  
299 there was a presence of a statistically significant relationship between the two factors. Our  
300 study specifically found that the prevalence of BDD was significantly higher (6.6%) among  
301 subjects who were diagnosed with PDF3 and it was the most statistically significant  
302 associated factor of BDD (adjusted OR=5.74, 95% CI 4.57 to 7.21, P<0.001). Although a  
303 study conducted in Japan, concluded fibrosis and BDD as being indicators of CCA, they did  
304 not mention an association between them.<sup>17</sup> In addition, studies conducted in Thailand report  
305 only PDF as a major risk factor of CCA development.<sup>8 21 30</sup>

306 We conducted a bivariate analysis via a simple logistic regression and found that gender,  
307 age, and smoking history were the three most significant factors associated with BDD and  
308 remained significant in the multivariable analysis. The factor of relatives diagnosed with  
309 CCA became significant in multivariable analysis, but the magnitude of association was still  
310 relatively low, while education levels and PZQ treatment became non-significant. The other  
311 factors that were statistically significant in the bivariate analysis became less significant after  
312 adjusting for all factors in the multivariable analysis included occupations, alcohol  
313 consumption history, and being diagnosed with DM. Consistent with other studies,<sup>17-21</sup> our  
314 results also found a significant association between current liver fluke infection and BDD.  
315 Liver fluke infection in Northeast Thailand mainly results from the consumption of raw or  
316 insufficiently fermented fish and is one of the main established risk factors for BDD and  
317 CCA development.

1  
2  
3 318 Our study found that those aged 60-years-old and over are more likely to have BDD than  
4  
5 319 other age groups. Meanwhile, our study also found the association of BDD increased with  
6  
7 320 increasing age. We conclude that age plays a role in BDD development. This result is similar  
8  
9  
10 321 to a study conducted in Israel between 2001-2002 which found that bile duct size increases  
11  
12 322 with age and reported age was positively correlated with bile duct size.<sup>31</sup> A study from  
13  
14 323 Canada in 2014 found that older age was associated with bile duct diameters which increases  
15  
16 324 with age.<sup>32</sup> Therefore, it is not a surprise that those who were in the oldest age group in our  
17  
18 325 study had a strong association with BDD, which causes the bile duct to grow.

19  
20  
21 326 Subjects positive for HB and HC diagnosis demonstrated a non-significant association  
22  
23 327 with BDD (adjusted OR=1.16, 95% CI 0.88 to 1.52, P=0.298 and adjusted OR=1.69, 95% CI  
24  
25 328 0.87 to 3.31, P=0.124, respectively). Our findings are close to results reported by Barusrux  
26  
27 329 and colleagues in 2012 which found that HB and HC were not related to CCA.<sup>33</sup> However, it  
28  
29 330 is also important to mention contradictory results reported in South Korea which found that  
30  
31 331 HBV infection was a significant risk factor for intrahepatic cholangiocarcinoma (ICC)  
32  
33 332 development with OR=2.3, 95% CI 1.6 to 3.3 P<0.05.<sup>34</sup> HBV infection was also related to a  
34  
35 333 3.4-fold risk of ICC in China.<sup>35</sup> Another study conducted in Northeast Thailand in 2010,  
36  
37 334 examined the association of HB and HC with CCA and reported a greater risk of CCA for  
38  
39 335 those carrying the virus (OR=4, 95% CI 1.29 to 16.44, P<0.05).<sup>36</sup>

40  
41 336 And interestingly, those who had CCA diagnosed relatives, had a higher association to  
42  
43 337 BDD than those who did not have CCA diagnosed relatives only 12% (adjusted OR=1.12,  
44  
45 338 95% CI 1.02 to 1.24, P=0.018). However, our results were consistent with Zhou et al. (2014),  
46  
47 339 who identified genetic and familial risk factors as significantly contributing to the  
48  
49 340 development of combined HCC-CCA through a bivariate analysis.<sup>37</sup> It is worth mentioning  
50  
51 341 that this significance could not be confirmed through a multivariable analysis. Other studies  
52  
53 342 also demonstrate that having a family history of cancer is a significant associated factor for  
54  
55  
56  
57  
58  
59  
60

1  
2  
3 343 CCA development.<sup>38 39</sup> A risk factor study of CCA in Northeast Thailand also reported  
4  
5 344 patients who had a family history of cancer were more likely to develop CCA than those  
6  
7 345 without a family history of liver cancer.<sup>40</sup> Death or traumatic incidences influence the  
8  
9  
10 346 decision-making process. This may be the reason behind the lack of association between  
11  
12 347 family history of CCA and BDD in our statistical analysis. Perhaps family members who  
13  
14 348 experience a death of CCA-diagnosed family member are more likely to take measures in  
15  
16 349 preventing the occurrence of a second CCA incidence in the family. A CCA traumatic  
17  
18 350 experience may have served as a warning for family members to avoid this rapid and fatal  
19  
20 351 outcome. These results reveal the complicated nature of understanding the true risk factors of  
21  
22 352 CCA and pathogenesis to hepatic carcinoma in certain Asian societies.  
23  
24

25  
26 353 This study has some limitations. Firstly, although large, the study population is not  
27  
28 354 representative of the overall population of Northeast Thailand. The recruitment method,  
29  
30 355 through tertiary hospitals, may mean that the study population has some underlying  
31  
32 356 differences in health status from the general population. In particular the prevalence of BDD  
33  
34 357 and PDF in the study group is likely to vary from overall population prevalence. However,  
35  
36 358 the study has internal validity meaning relationships found between the various hepatobiliary  
37  
38 359 abnormalities and other predictive factors are still important and useful. Also, many of the  
39  
40 360 risk factors including history of previous liver fluke infection (and PZQ treatment) as well as  
41  
42 361 health behaviors in terms of smoking and alcohol consumption were self-reported leading to  
43  
44 362 some potential bias in their measurements.  
45  
46  
47  
48

49 363 PDF and BDD can be detected by ultrasound screening before any clinical symptom of  
50  
51 364 CCA are evident. Additional further characterization by other advanced imaging and  
52  
53 365 endoscopic examinations is standard for differential diagnosis of CCA from other diseases.  
54  
55 366 Histopathological confirmation is mandatory in the patient with a surgical indication.  
56  
57  
58  
59  
60

1  
2  
3 367 Longitudinal data collection is necessary for further study of the relationship between PDF  
4  
5 368 and BDD and CCA.  
6  
7  
8 369

## 10 370 **CONCLUSIONS**

11  
12 371 In conclusion, our key findings included identifying the factors associated with biliary tract  
13  
14 372 disease in a high-risk population for CCA: PDF3, male gender, older age, having CCA-  
15  
16 373 diagnosed relatives, infected liver fluke, and smoking history. Based on our results, patients  
17  
18 374 should be considered suspected-CCA cases during US screenings in high-risk areas through  
19  
20 375 the detection of PDF, old age (50 and over), if they were infected for liver fluke, have CCA-  
21  
22 376 diagnosed relatives, and are current or previous smokers. The interesting results regarding  
23  
24 377 HB and HC diagnoses may need further evaluation and review due to some contradictions in  
25  
26 378 the data. Greater consideration toward CCA and HCC prevention should be aimed at those in  
27  
28 379 older age groups. Despite certain limitations, our data was based on a very large sample size  
29  
30 380 and suggests a statistically robust association between PDF and BDD, specifically the PDF3  
31  
32 381 grouping. Early and routine screening of BDD and PDF may provide a means to reduce the  
33  
34 382 incidence of liver-related diseases and CCA. Future planning of CCA surveillance should  
35  
36 383 focus on early screening for both PDF and BDD.  
37  
38  
39  
40  
41  
42  
43  
44  
45  
46  
47  
48  
49  
50  
51  
52  
53  
54  
55  
56  
57  
58  
59  
60

## 385 **Recommendations**

386 This study was conducted in Northeast Thailand and may not reflect the general population.  
387 Further study is necessary in the region to test the generality of our results. Nevertheless, the  
388 methodology and results of our study can be used as a guideline in formulating clinical  
389 practice and future research priorities.

## 391 **List of abbreviations**



1  
2  
3 392 BDD, Bile duct dilatation; CASCAP, Cholangiocarcinoma Screening and Care Program;  
4  
5 393 CCA, Cholangiocarcinoma; CI, Confidence interval; DM, Diabetes mellitus, HB, Hepatitis  
6  
7 394 B; HC, Hepatitis C; HCC, Hepatocellular carcinoma; ICC, Intrahepatic cholangiocarcinoma;  
8  
9 395 N/A, Not applicable; OR, Odds ratios; PDF, Periductal fibrosis; PZQ, Praziquantel; US,  
10  
11 396 Ultrasonography; WHO, World Health Organization.  
12  
13  
14  
15 397

16  
17 398 **Conflict of interest**

18  
19 399 All authors declare no conflict of interest.  
20  
21  
22 400

23  
24 401 **Acknowledgements** This study was supported by Khon Kaen University (KKU) through  
25  
26 402 CASCAP project and the National Research Council of Thailand through the Medical  
27  
28 403 Research Network of the Consortium of Thai Medical Schools. The study was also supported  
29  
30 404 by the Data Management and Statistical Analysis Center (DAMASAC), Faculty of Public  
31  
32 405 Health, KKU, Thailand. We would like to acknowledge and thank Dr.Malcolm Anthony  
33  
34 406 Moore for his comments and suggestions over the final version of the manuscript.  
35  
36  
37  
38 407

39  
40 408 **Author contributions** NC, SP, and KT conceived and designed this study. KT and BT  
41  
42 409 performed the analysis. NC, SP, NK, BT, KT, ATS and MK wrote the manuscript. NC, NK,  
43  
44 410 BT and KT collected the data and generated the clinical database. All authors have been  
45  
46 411 involved in revising the manuscript, and all authors have read and approved the final  
47  
48 412 manuscript.  
49  
50  
51

52 413

53  
54 414 **Funding** This work was supported by Khon Kaen University through CASCAP (Grant No .  
55  
56 415 CASCAP 1/60), the National Research Council of Thailand through the Medical Research  
57  
58  
59  
60

1  
2  
3 416 Network of the Consortium of Thai Medical Schools (Grant No .MRF.59-076) and National  
4  
5 417 Research Council of Thailand (NRCT/2559-134).  
6  
7

8 418

9  
10 419 **Competing interests** The authors declare that they have no competing interests.  
11  
12

13 420

14  
15 421 **Patient consent** All patients gave written informed consent for the study.  
16  
17

18 422

19  
20 423 **Ethics approval** The research protocol was approved by Khon Kaen University Ethics  
21  
22

23 424 Committee for Human Research, reference number HE591067.  
24  
25

26 425

27 426 **Provenance and peer review** Not commissioned; externally peer reviewed.  
28  
29

30 427

31 428 **Data sharing statement** No additional data are available.  
32  
33

34 429

35 430

36  
37  
38 431 **REFERENCES**  
39

40 432 1. Moore MA, Attasara P, Khuhaprema T, et al. Cancer epidemiology in mainland South-  
41  
42 433 East Asia - past, present and future. *Asian Pacific journal of cancer prevention : APJCP*  
43  
44 434 2010;11 Suppl 2:67-80.

45  
46 435 2. Moore MA, Manan AA, Chow KY, et al. Cancer epidemiology and control in peninsular  
47  
48 436 and island South-East Asia - past, present and future. *Asian Pacific journal of cancer*  
49  
50 437 *prevention : APJCP* 2010;11 Suppl 2:81-98.  
51  
52

53  
54 438 3. National Cancer Institue. Hospital based cancer registry annual report 2012. Bangkok:  
55  
56 439 Eastern Printing Public Company Limited PCL.157 2012.  
57  
58  
59  
60

- 1  
2  
3 440 4. Rosen CB, Nagorney DM, Wiesner RH, et al. Cholangiocarcinoma complicating primary  
4  
5 441 sclerosing cholangitis. *Annals of surgery* 1991;213(1):21-5.
- 6  
7 442 5. Songserm N, Promthet S, Sithithaworn P, et al. Risk factors for cholangiocarcinoma in  
8  
9 443 high-risk area of Thailand: role of lifestyle, diet and methylenetetrahydrofolate reductase  
10  
11 444 polymorphisms. *Cancer epidemiology* 2012;36(2):e89-94. doi:  
12  
13 445 10.1016/j.canep.2011.11.007
- 14  
15 446 6. Tao LY, He XD, Qu Q, et al. Risk factors for intrahepatic and extrahepatic  
16  
17 447 cholangiocarcinoma: a case-control study in China. *Liver international : official journal*  
18  
19 448 *of the International Association for the Study of the Liver* 2010;30(2):215-21. doi:  
20  
21 449 10.1111/j.1478-3231.2009.02149.x
- 22  
23 450 7. Shaib YH, El-Serag HB, Nooka AK, et al. Risk factors for intrahepatic and extrahepatic  
24  
25 451 cholangiocarcinoma: a hospital-based case-control study. *The American journal of*  
26  
27 452 *gastroenterology* 2007;102(5):1016-21. doi: 10.1111/j.1572-0241.2007.01104.x
- 28  
29 453 8. Chamadol N, Pairojkul C, Khuntikeo N, et al. Histological confirmation of periductal  
30  
31 454 fibrosis from ultrasound diagnosis in cholangiocarcinoma patients. *Journal of hepato-*  
32  
33 455 *biliary-pancreatic sciences* 2014;21(5):316-22. doi: 10.1002/jhbp.64
- 34  
35 456 9. Welzel TM, Graubard BI, El-Serag HB, et al. Risk factors for intrahepatic and  
36  
37 457 extrahepatic cholangiocarcinoma in the United States: a population-based case-control  
38  
39 458 study. *Clinical gastroenterology and hepatology : the official clinical practice journal of*  
40  
41 459 *the American Gastroenterological Association* 2007;5(10):1221-8. doi:  
42  
43 460 10.1016/j.cgh.2007.05.020
- 44  
45 461 10. Shaib YH, El-Serag HB, Davila JA, et al. Risk factors of intrahepatic cholangiocarcinoma  
46  
47 462 in the United States: a case-control study. *Gastroenterology* 2005;128(3):620-6.
- 48  
49 463 11. Hamilton SR, Aaltonen LA. Pathology and genetics of tumours of the digestive system.  
50  
51 464 France: Lyon : Oxford : IARC Press ; Oxford University Press (distributor). 2000.

- 1  
2  
3 465 12. Khan SA, Davidson BR, Goldin RD, et al. Guidelines for the diagnosis and treatment of  
4  
5 466 cholangiocarcinoma: an update. *Gut* 2012;61(12):1657-69. doi: 10.1136/gutjnl-2011-  
6  
7 467 301748  
8  
9  
10 468 13. Saini S. Imaging of the hepatobiliary tract. *The New England journal of medicine*  
11  
12 469 1997;336(26):1889-94. doi: 10.1056/NEJM199706263362607  
13  
14 470 14. Blechacz B, Gores GJ. Cholangiocarcinoma: advances in pathogenesis, diagnosis, and  
15  
16 471 treatment. *Hepatology* 2008;48(1):308-21. doi: 10.1002/hep.22310  
17  
18 472 15. Zen Y, Adsay NV, Bardadin K, et al. Biliary intraepithelial neoplasia: an international  
19  
20 473 interobserver agreement study and proposal for diagnostic criteria. *Modern pathology :*  
21  
22 474 *an official journal of the United States and Canadian Academy of Pathology, Inc*  
23  
24 475 2007;20(6):701-9. doi: 10.1038/modpathol.3800788  
25  
26 476 16. Nakanuma Y, Sasaki M, Sato Y, et al. Multistep carcinogenesis of perihilar  
27  
28 477 cholangiocarcinoma arising in the intrahepatic large bile ducts. *World journal of*  
29  
30 478 *hepatology* 2009;1(1):35-42. doi: 10.4254/wjh.v1.i1.35  
31  
32 479 17. Maetani Y, Itoh K, Watanabe C, et al. MR imaging of intrahepatic cholangiocarcinoma  
33  
34 480 with pathologic correlation. *AJR American journal of roentgenology* 2001;176(6):1499-  
35  
36 481 507. doi: 10.2214/ajr.176.6.1761499  
37  
38 482 18. National Cancer Institue. Guidelines for screening, diagnosis and treatment of liver  
39  
40 483 cancer and cholangiocarcinoma. Bangkok: National Office of Buddhism 2011:81.  
41  
42 484 19. Nittaya Chamadol. Imaging in Cholangiocarcinoma. Khon Kaen, Thailand: Department  
43  
44 485 of Radiology, Faculty of Medicine, Khon Kaen University, Khon Kaen, Thailand 2014.  
45  
46 486 20. Xu HX, Chen LD, Liu LN, et al. Contrast-enhanced ultrasound of intrahepatic  
47  
48 487 cholangiocarcinoma: correlation with pathological examination. *The British journal of*  
49  
50 488 *radiology* 2012;85(1016):1029-37. doi: 10.1259/bjr/21653786  
51  
52  
53  
54  
55  
56  
57  
58  
59  
60

- 1  
2  
3 489 21. Sripa B, Mairiang E, Thinkhamrop B, et al. Advanced periductal fibrosis from infection  
4  
5 490 with the carcinogenic human liver fluke *Opisthorchis viverrini* correlates with elevated  
6  
7 491 levels of interleukin-6. *Hepatology* 2009;50(4):1273-81. doi: 10.1002/hep.23134  
8  
9  
10 492 22. Benedetti NJ, Desser TS, Jeffrey RB. Imaging of hepatic infections. *Ultrasound Q*  
11  
12 493 2008;24(4):267-78. doi: 10.1097/RUQ.0b013e31818e5981  
13  
14  
15 494 23. Loria F, Loria G, Basile S, et al. Contrast-enhanced ultrasound appearances of  
16  
17 495 enhancement patterns of intrahepatic cholangiocarcinoma: correlation with pathological  
18  
19 496 findings. *Updates in surgery* 2014;66(2):135-43. doi: 10.1007/s13304-014-0251-6  
20  
21  
22 497 24. Elkins DB, Mairiang E, Sithithaworn P, et al. Cross-sectional patterns of hepatobiliary  
23  
24 498 abnormalities and possible precursor conditions of cholangiocarcinoma associated with  
25  
26 499 *Opisthorchis viverrini* infection in humans. *The American journal of tropical medicine*  
27  
28 500 *and hygiene* 1996;55(3):295-301.  
29  
30  
31 501 25. Khuntikeo N, Chamadol N, Yongvanit P, et al. Cohort profile: cholangiocarcinoma  
32  
33 502 screening and care program (CASCAP). *BMC cancer* 2015;15:459. doi: 10.1186/s12885-  
34  
35 503 015-1475-7  
36  
37  
38 504 26. Berhe N, Geitung JT, Medhin G, et al. Large scale evaluation of WHO's ultrasonographic  
39  
40 505 staging system of schistosomal periportal fibrosis in Ethiopia. *Tropical Medicine &*  
41  
42 506 *International Health* 2006;11(8):1286-94. doi: DOI 10.1111/j.1365-3156.2006.01665.x  
43  
44  
45 507 27. Ferlay J, Soerjomataram I, Dikshit R, et al. Cancer incidence and mortality worldwide:  
46  
47 508 sources, methods and major patterns in GLOBOCAN 2012. *International journal of*  
48  
49 509 *cancer Journal international du cancer* 2015;136(5):E359-86. doi: 10.1002/ijc.29210  
50  
51  
52 510 28. Sripa B, Pairojkul C. Cholangiocarcinoma: lessons from Thailand. *Current opinion in*  
53  
54 511 *gastroenterology* 2008;24(3):349-56. doi: 10.1097/MOG.0b013e3282fbf9b3  
55  
56  
57 512 29. Srivatanakul P, Sriplung H, Deerasamee S. Epidemiology of liver cancer: an overview.  
58  
59 513 *Asian Pacific journal of cancer prevention : APJCP* 2004;5(2):118-25.  
60

- 1  
2  
3 514 30. Prakobwong S, Yongvanit P, Hiraku Y, et al. Involvement of MMP-9 in peribiliary  
4  
5 515 fibrosis and cholangiocarcinogenesis via Rac1-dependent DNA damage in a hamster  
6  
7 516 model. *International journal of cancer Journal international du cancer*  
8  
9 517 2010;127(11):2576-87. doi: 10.1002/ijc.25266  
10  
11  
12 518 31. Bachar GN, Cohen M, Belenky A, et al. Effect of aging on the adult extrahepatic bile  
13  
14 519 duct: a sonographic study. *Journal of ultrasound in medicine : official journal of the*  
15  
16 520 *American Institute of Ultrasound in Medicine* 2003;22(9):879-82; quiz 83-5.  
17  
18  
19 521 32. Landry D, Tang A, Murphy-Lavallee J, et al. Dilatation of the bile duct in patients after  
20  
21 522 cholecystectomy: a retrospective study. *Canadian Association of Radiologists journal =*  
22  
23 523 *Journal l'Association canadienne des radiologistes* 2014;65(1):29-34. doi:  
24  
25 524 10.1016/j.carj.2012.09.004  
26  
27  
28 525 33. Barusrux S, Nanok C, Puthisawas W, et al. Viral hepatitis B, C infection and genotype  
29  
30 526 distribution among cholangiocarcinoma patients in northeast Thailand. *Asian Pacific*  
31  
32 527 *journal of cancer prevention : APJCP* 2012;13 Suppl:83-7.  
33  
34  
35 528 34. Lee TY, Lee SS, Jung SW, et al. Hepatitis B virus infection and intrahepatic  
36  
37 529 cholangiocarcinoma in Korea: a case-control study. *The American journal of*  
38  
39 530 *gastroenterology* 2008;103(7):1716-20. doi: 10.1111/j.1572-0241.2008.01796.x  
40  
41  
42 531 35. Li M, Li J, Li P, et al. Hepatitis B virus infection increases the risk of  
43  
44 532 cholangiocarcinoma: a meta-analysis and systematic review. *Journal of gastroenterology*  
45  
46 533 *and hepatology* 2012;27(10):1561-8. doi: 10.1111/j.1440-1746.2012.07207.x  
47  
48  
49 534 36. Srivatanakul P, Honjo S, Kittiwatanachot P, et al. Hepatitis viruses and risk of  
50  
51 535 cholangiocarcinoma in northeast Thailand. *Asian Pacific journal of cancer prevention :*  
52  
53 536 *APJCP* 2010;11(4):985-8.  
54  
55  
56  
57  
58  
59  
60

- 1  
2  
3 537 37. Zhou YM, Zhang XF, Wu LP, et al. Risk factors for combined hepatocellular-  
4  
5 538 cholangiocarcinoma: a hospital-based case-control study. *World journal of*  
6  
7 539 *gastroenterology : WJG* 2014;20(35):12615-20. doi: 10.3748/wjg.v20.i35.12615  
8  
9  
10 540 38. Kamsa-Ard S, Luvira V, Pugkhem A, et al. Association between praziquantel treatment  
11  
12 541 and cholangiocarcinoma: a hospital-based matched case-control study. *BMC cancer*  
13  
14 542 2015;15:776. doi: 10.1186/s12885-015-1788-6  
15  
16  
17 543 39. Liu ZY, Zhou YM, Shi LH, et al. Risk factors of intrahepatic cholangiocarcinoma in  
18  
19 544 patients with hepatolithiasis: a case-control study. *Hepatobiliary & pancreatic diseases*  
20  
21 545 *international : HBPD INT* 2011;10(6):626-31.  
22  
23  
24 546 40. Manwong M, Songserm N, Promthet S, et al. Risk factors for cholangiocarcinoma in the  
25  
26 547 lower part of Northeast Thailand: a hospital-based case-control study. *Asian Pacific*  
27  
28 548 *journal of cancer prevention : APJCP* 2013;14(10):5953-6.  
29  
30  
31 549  
32  
33  
34  
35  
36  
37  
38  
39  
40  
41  
42  
43  
44  
45  
46  
47  
48  
49  
50  
51  
52  
53  
54  
55  
56  
57  
58  
59  
60

1  
2  
3 551 **Captions for the figures:**  
4

5  
6 552

7  
8 553 **Figure 1** Percentage of BDD between male and female according to PDF1, 2, and 3.  
9

10  
11 554

12 555 **Figure 2** Number of BDD in PDF subjects by age range.  
13

14  
15 556

16  
17 557 **Figure 3** The adjusted OR and crude OR of the associated factors of BDD.  
18

19  
20 558

21  
22 **Table 1** Baseline demographic and clinical characteristics of subjects  
23

| Characteristics            | Number (n=394 026) | Percentage |
|----------------------------|--------------------|------------|
| Gender                     |                    |            |
| Female                     | 242 115            | 61.4       |
| Male                       | 151 866            | 38.6       |
| Missing data (n=45)        |                    |            |
| Age group (years)          |                    |            |
| 40-44                      | 49 281             | 12.9       |
| 45-49                      | 71 564             | 18.7       |
| 50-54                      | 78 428             | 20.5       |
| 55-59                      | 69 530             | 18.2       |
| 60 years and over          | 114 305            | 29.8       |
| Mean±Standard deviation    | 54.92±9.03         |            |
| Median (minimum : maximum) | 54 (40 : 100)      |            |
| Missing data (n=10 918)    |                    |            |
| Education levels           |                    |            |
| None                       | 6561               | 1.7        |
| Primary                    | 286 840            | 72.9       |



**Table 1** Baseline demographic and clinical characteristics of subjects

| Characteristics                       | Number (n=394 026) | Percentage |
|---------------------------------------|--------------------|------------|
| Secondary                             | 78 090             | 19.9       |
| Certificate/Bachelor                  | 18 632             | 4.7        |
| Higher than bachelor                  | 3055               | 0.8        |
| Missing data (n=848)                  |                    |            |
| Occupation                            |                    |            |
| Unemployed                            | 15 582             | 4.0        |
| Farmer                                | 306 421            | 77.9       |
| Labor                                 | 32 420             | 8.2        |
| Own business                          | 13 467             | 3.4        |
| Government official/State enterprises | 13 997             | 3.6        |
| Others                                | 11 335             | 2.9        |
| Missing data (n=804)                  |                    |            |
| Relatives diagnosed with CCA          |                    |            |
| No                                    | 319 902            | 81.4       |
| Yes                                   | 73 286             | 18.6       |
| Missing data (n=838)                  |                    |            |
| Liver fluke infection                 |                    |            |
| No                                    | 113 178            | 62.1       |
| Yes                                   | 68 979             | 37.9       |
| Missing data (n=211 869)              |                    |            |
| Praziquantel treatment                |                    |            |
| None                                  | 270 183            | 70.3       |
| One time                              | 84 136             | 21.9       |
| Two times                             | 18 126             | 4.7        |
| Three times                           | 5264               | 1.4        |

**Table 1** Baseline demographic and clinical characteristics of subjects

| Characteristics             | Number (n=394 026) | Percentage |
|-----------------------------|--------------------|------------|
| More than three times       | 6414               | 1.7        |
| Missing data (n=9903)       |                    |            |
| Smoking history             |                    |            |
| No                          | 308 776            | 78.7       |
| Yes, current or previous    | 83 754             | 21.3       |
| Missing data (n=1496)       |                    |            |
| Alcohol consumption history |                    |            |
| No                          | 214 495            | 54.6       |
| Yes, current or previous    | 178 564            | 45.4       |
| Missing data (n=967)        |                    |            |
| Hepatitis B                 |                    |            |
| No                          | 382 058            | 98.2       |
| Yes                         | 6803               | 1.8        |
| Missing data (n=5165)       |                    |            |
| Hepatitis C                 |                    |            |
| No                          | 388 114            | 99.8       |
| Yes                         | 747                | 0.2        |
| Missing data (n=5165)       |                    |            |
| Diabetes mellitus           |                    |            |
| No                          | 362 296            | 93.2       |
| Yes                         | 26 565             | 6.8        |
| Missing data (n=5165)       |                    |            |
| Periductal fibrosis         |                    |            |
| None                        | 324 482            | 82.4       |
| PDF1                        | 48 383             | 12.3       |

**Table 1** Baseline demographic and clinical characteristics of subjects

| Characteristics | Number (n=394 026) | Percentage |
|-----------------|--------------------|------------|
| PDF2            | 18 686             | 4.7        |
| PDF3            | 2475               | 0.6        |

559

**Table 2** Prevalence, and crude and adjusted odd ratios of BDD associated factors and their 95% confidence interval

| Factors              | Subjects | % BDD | Crude OR | Adjusted OR | 95% CI       | P value |
|----------------------|----------|-------|----------|-------------|--------------|---------|
| Over all             | 394 026  | 1.2   | N/A      | N/A         | N/A          | N/A     |
| Periductal fibrosis  |          |       |          |             |              | <0.001  |
| None                 | 324 482  | 1.1   | 1        | 1           |              |         |
| PDF1                 | 48 383   | 1.4   | 1.23     | 1.25        | 1.11 to 1.40 |         |
| PDF2                 | 18 686   | 1.7   | 1.55     | 1.24        | 1.04 to 1.47 |         |
| PDF3                 | 2475     | 6.6   | 6.35     | 5.74        | 4.57 to 7.21 |         |
| Gender               |          |       |          |             |              | <0.001  |
| Female               | 242 115  | 0.9   | 1        | 1           |              |         |
| Male                 | 151 866  | 1.7   | 2.00     | 1.46        | 1.31 to 1.63 |         |
| Age group (years)    |          |       |          |             |              | <0.001  |
| 40-44                | 49 281   | 0.6   | 1        | 1           |              |         |
| 45-49                | 71 564   | 0.6   | 1.04     | 1.10        | 0.88 to 1.38 |         |
| 50-54                | 78 428   | 0.9   | 1.44     | 1.42        | 1.15 to 1.75 |         |
| 55-59                | 69 530   | 1.1   | 1.77     | 1.74        | 1.42 to 2.14 |         |
| 60 years and over    | 114 305  | 2.1   | 3.46     | 3.14        | 2.59 to 3.81 |         |
| Education levels     |          |       |          |             |              | 0.472   |
| None                 | 6561     | 1.6   | 1        | 1           |              |         |
| Primary              | 286 840  | 1.3   | 0.82     | 0.91        | 0.65 to 1.27 |         |
| Secondary            | 78 090   | 0.8   | 0.53     | 0.72        | 0.51 to 1.03 |         |
| Certificate/Bachelor | 18 632   | 1.1   | 0.71     | 0.81        | 0.53 to 1.24 |         |
| Higher than bachelor | 3055     | 1.5   | 0.98     | 0.94        | 0.52 to 1.71 |         |

**Table 2** Prevalence, and crude and adjusted odd ratios of BDD associated factors and their 95% confidence interval

| Factors                      | Subjects | % BDD | Crude OR | Adjusted OR | 95% CI       | P value |
|------------------------------|----------|-------|----------|-------------|--------------|---------|
| Occupations                  |          |       |          |             |              | <0.001  |
| Unemployed                   | 15 582   | 2.5   | 1        | 1           |              |         |
| Farmer                       | 306 421  | 1.1   | 0.45     | 0.47        | 0.40 to 0.55 |         |
| Labor                        | 32 420   | 1.0   | 0.39     | 0.53        | 0.41 to 0.67 |         |
| Own business                 | 13 467   | 1.0   | 0.40     | 0.65        | 0.48 to 0.87 |         |
| Government/State enterprises | 13 997   | 1.5   | 0.59     | 0.87        | 0.63 to 1.20 |         |
| Others                       | 11 335   | 1.4   | 0.57     | 0.60        | 0.44 to 0.80 |         |
| Relatives diagnosed with CCA |          |       |          |             |              | 0.018   |
| No                           | 319 902  | 1.2   | 1        | 1           |              |         |
| Yes                          | 73 286   | 1.2   | 0.99     | 1.12        | 1.02 to 1.24 |         |
| Liver fluke infection        |          |       |          |             |              | <0.001  |
| No                           | 113 178  | 1.2   | 1        | 1           |              |         |
| Yes                          | 68 979   | 1.5   | 1.24     | 1.25        | 1.12 to 1.39 |         |
| Praziquantel treatment       |          |       |          |             |              | 0.067   |
| None                         | 270 183  | 1.1   | 1        | 1           |              |         |
| One time                     | 84 136   | 1.3   | 1.20     | 0.85        | 0.75 to 0.95 |         |
| Two times                    | 18 126   | 1.5   | 1.33     | 0.93        | 0.79 to 1.10 |         |
| Three times                  | 5264     | 1.7   | 1.56     | 1.10        | 0.85 to 1.43 |         |
| More than three times        | 6414     | 1.8   | 1.63     | 1.26        | 1.00 to 1.59 |         |
| Smoking history              |          |       |          |             |              | <0.001  |
| No                           | 308 776  | 1.0   | 1        | 1           |              |         |
| Yes, current or previous     | 83 754   | 2.0   | 2.11     | 1.31        | 1.17 to 1.46 |         |
| Alcohol consumption history  |          |       |          |             |              | 0.002   |
| No                           | 214 495  | 1.0   | 1        | 1           |              |         |
| Yes, current or previous     | 178 564  | 1.4   | 1.45     | 1.17        | 1.06 to 1.29 |         |
| Hepatitis B virus            |          |       |          |             |              | 0.298   |

**Table 2** Prevalence, and crude and adjusted odd ratios of BDD associated factors and their 95% confidence interval

| Factors           | Subjects | % BDD | Crude OR | Adjusted OR | 95% CI       | P value |
|-------------------|----------|-------|----------|-------------|--------------|---------|
| No                | 382 058  | 1.2   | 1        | 1           |              |         |
| Yes               | 6803     | 1.4   | 1.13     | 1.16        | 0.88 to 1.52 |         |
| Hepatitis C virus |          |       |          |             |              | 0.124   |
| No                | 388 114  | 1.2   | 1        | 1           |              |         |
| Yes               | 747      | 2.0   | 1.69     | 1.69        | 0.87 to 3.31 |         |
| Diabetes mellitus |          |       |          |             |              | 0.011   |
| No                | 362 296  | 1.2   | 1        | 1           |              |         |
| Yes               | 26 565   | 1.6   | 1.37     | 1.20        | 1.04 to 1.37 |         |

560 N/A, Not applicable.

561

1  
2  
3  
4  
5  
6  
7  
8  
9  
10  
11  
12  
13  
14  
15  
16  
17  
18  
19  
20  
21  
22  
23  
24  
25  
26  
27  
28  
29  
30  
31  
32  
33  
34  
35  
36  
37  
38  
39  
40  
41  
42  
43  
44  
45  
46  
47  
48  
49  
50  
51  
52  
53  
54  
55  
56  
57  
58  
59  
60



Figure 1 Percentage of BDD between male and female according to PDF1, 2, and 3.

143x104mm (300 x 300 DPI)

1  
2  
3  
4  
5  
6  
7  
8  
9  
10  
11  
12  
13  
14  
15  
16  
17  
18  
19  
20  
21  
22  
23  
24  
25  
26  
27  
28  
29  
30  
31  
32  
33  
34  
35  
36  
37  
38  
39  
40  
41  
42  
43  
44  
45  
46  
47  
48  
49  
50  
51  
52  
53  
54  
55  
56  
57  
58  
59  
60



Figure 2 Number of BDD in PDF subjects by age range.

141x103mm (300 x 300 DPI)



Figure 3 The adjusted OR and crude OR of the associated factors of BDD.

154x215mm (300 x 300 DPI)



## STROBE Statement—checklist of items that should be included in reports of observational studies

|                              | Item No                                                                                                      | Location                              | Recommendation                                                                                                                                                                             |
|------------------------------|--------------------------------------------------------------------------------------------------------------|---------------------------------------|--------------------------------------------------------------------------------------------------------------------------------------------------------------------------------------------|
| Title and abstract           | 1                                                                                                            | Pg3                                   | (a) Indicate the study's design with a commonly used term in the title or the abstract                                                                                                     |
|                              |                                                                                                              | Pg3                                   | (b) Provide in the abstract an informative and balanced summary of what was done and what was found                                                                                        |
| <b>Introduction</b>          |                                                                                                              |                                       |                                                                                                                                                                                            |
| Background/rationale         | 2                                                                                                            | Pgs5-6                                | Explain the scientific background and rationale for the investigation being reported                                                                                                       |
| Objectives                   | 3                                                                                                            | Pg6                                   | State specific objectives, including any prespecified hypotheses                                                                                                                           |
| <b>Methods</b>               |                                                                                                              |                                       |                                                                                                                                                                                            |
| Study design                 | 4                                                                                                            | Pgs 6-7                               | Present key elements of study design early in the paper                                                                                                                                    |
| Setting                      | 5                                                                                                            | Pgs 6-7                               | Describe the setting, locations, and relevant dates, including periods of recruitment, exposure, follow-up, and data collection                                                            |
| Participants                 | 6                                                                                                            | Pgs6-7                                | (a) <i>Cohort study</i> —Give the eligibility criteria, and the sources and methods of selection of participants. Describe methods of follow-up                                            |
|                              |                                                                                                              |                                       | <i>Case-control study</i> —Give the eligibility criteria, and the sources and methods of case ascertainment and control selection. Give the rationale for the choice of cases and controls |
|                              |                                                                                                              | N/A                                   | (b) <i>Cohort study</i> —For matched studies, give matching criteria and number of exposed and unexposed                                                                                   |
|                              |                                                                                                              |                                       | <i>Case-control study</i> —For matched studies, give matching criteria and the number of controls per case                                                                                 |
| Variables                    | 7                                                                                                            | Pg8                                   | Clearly define all outcomes, exposures, predictors, potential confounders, and effect modifiers. Give diagnostic criteria, if applicable                                                   |
| Data sources/<br>measurement | 8*                                                                                                           | Pgs7-8                                | For each variable of interest, give sources of data and details of methods of assessment (measurement). Describe comparability of assessment methods if there is more than one group       |
| Bias                         | 9                                                                                                            | Pg4                                   | Describe any efforts to address potential sources of bias                                                                                                                                  |
| Study size                   | 10                                                                                                           | Pg6-7                                 | Explain how the study size was arrived at                                                                                                                                                  |
| Quantitative variables       | 11                                                                                                           | Pg8-9                                 | Explain how quantitative variables were handled in the analyses. If applicable, describe which groupings were chosen and why                                                               |
| Statistical methods          | 12                                                                                                           | Pg8-9                                 | (a) Describe all statistical methods, including those used to control for confounding                                                                                                      |
|                              |                                                                                                              |                                       | N/A                                                                                                                                                                                        |
|                              |                                                                                                              | Pg9                                   | (c) Explain how missing data were addressed                                                                                                                                                |
|                              |                                                                                                              | N/A                                   | (d) <i>Cohort study</i> —If applicable, explain how loss to follow-up was addressed                                                                                                        |
|                              |                                                                                                              |                                       | <i>Case-control study</i> —If applicable, explain how matching of cases and controls was addressed                                                                                         |
|                              | <i>Cross-sectional study</i> —If applicable, describe analytical methods taking account of sampling strategy |                                       |                                                                                                                                                                                            |
|                              | N/A                                                                                                          | (e) Describe any sensitivity analyses |                                                                                                                                                                                            |

Continued on next page

For peer review only

1  
2  
3  
4  
5  
6  
7  
8  
9  
10  
11  
12  
13  
14  
15  
16  
17  
18  
19  
20  
21  
22  
23  
24  
25  
26  
27  
28  
29  
30  
31  
32  
33  
34  
35  
36  
37  
38  
39  
40  
41  
42  
43  
44  
45  
46  
47  
48  
49  
50  
51  
52  
53  
54  
55  
56  
57  
58  
59  
60

| Location         |     | Results                  |                                                                                                                                                                                                              |
|------------------|-----|--------------------------|--------------------------------------------------------------------------------------------------------------------------------------------------------------------------------------------------------------|
| Participants     | 13* | Pg9                      | (a) Report numbers of individuals at each stage of study—eg numbers potentially eligible, examined for eligibility, confirmed eligible, included in the study, completing follow-up, and analysed            |
|                  |     | N/A                      | (b) Give reasons for non-participation at each stage                                                                                                                                                         |
|                  |     | N/A                      | (c) Consider use of a flow diagram                                                                                                                                                                           |
| Descriptive data | 14* | Pg9                      | (a) Give characteristics of study participants (eg demographic, clinical, social) and information on exposures and potential confounders                                                                     |
|                  |     | Pgs22-24                 | (b) Indicate number of participants with missing data for each variable of interest                                                                                                                          |
|                  |     | N/A                      | (c) <i>Cohort study</i> —Summarise follow-up time (eg, average and total amount)                                                                                                                             |
| Outcome data     | 15* | Pgs9-10                  | <i>Cohort study</i> —Report numbers of outcome events or summary measures over time                                                                                                                          |
|                  |     | N/A                      | <i>Case-control study</i> —Report numbers in each exposure category, or summary measures of exposure                                                                                                         |
|                  |     | Pg25                     | <i>Cross-sectional study</i> —Report numbers of outcome events or summary measures                                                                                                                           |
| Main results     | 16  | Pgs9-10                  | (a) Give unadjusted estimates and, if applicable, confounder-adjusted estimates and their precision (eg, 95% confidence interval). Make clear which confounders were adjusted for and why they were included |
|                  |     | N/a                      | (b) Report category boundaries when continuous variables were categorized                                                                                                                                    |
|                  |     | N/a                      | (c) If relevant, consider translating estimates of relative risk into absolute risk for a meaningful time period                                                                                             |
| Other analyses   | 17  | N/A                      | Report other analyses done—eg analyses of subgroups and interactions, and sensitivity analyses                                                                                                               |
|                  |     | <b>Discussion</b>        |                                                                                                                                                                                                              |
| Key results      | 18  | Pg11-12                  | Summarise key results with reference to study objectives                                                                                                                                                     |
| Limitations      | 19  | Pg4                      | Discuss limitations of the study, taking into account sources of potential bias or imprecision. Discuss both direction and magnitude of any potential bias                                                   |
| Interpretation   | 20  | Pg14                     | Give a cautious overall interpretation of results considering objectives, limitations, multiplicity of analyses, results from similar studies, and other relevant evidence                                   |
| Generalisability | 21  | Pg14                     | Discuss the generalisability (external validity) of the study results                                                                                                                                        |
|                  |     | <b>Other information</b> |                                                                                                                                                                                                              |
| Funding          | 22  | Pg15                     | Give the source of funding and the role of the funders for the present study and, if applicable, for the original study on which the present article is based                                                |

\*Give information separately for cases and controls in case-control studies and, if applicable, for exposed and unexposed groups in cohort and cross-sectional studies.

**Note:** An Explanation and Elaboration article discusses each checklist item and gives methodological background and published examples of transparent reporting. The STROBE checklist is best used in conjunction with this article (freely available on the Web sites of PLoS Medicine at <http://www.plosmedicine.org/>, Annals of Internal Medicine at <http://www.annals.org/>, and Epidemiology at <http://www.epidem.com/>). Information on the STROBE Initiative is available at [www.strobe-statement.org](http://www.strobe-statement.org).
